# Supplementary material for: Effect of Transgenesis on mRNA and miRNA Profiles in Cucumber Fruits Expressing Thaumatin II
Source: MDPI journal article supplement (doi:10.3390/genes11030334), 2020-03-20
Supplement: s1 [file s1]

Supplementary materials - Results of the SRING molecular network for Annexin (ANNATA3) according to *A. thaliana* database. Blue - present calcium binding domain and red present proteins involved in plant – pathogen interaction.

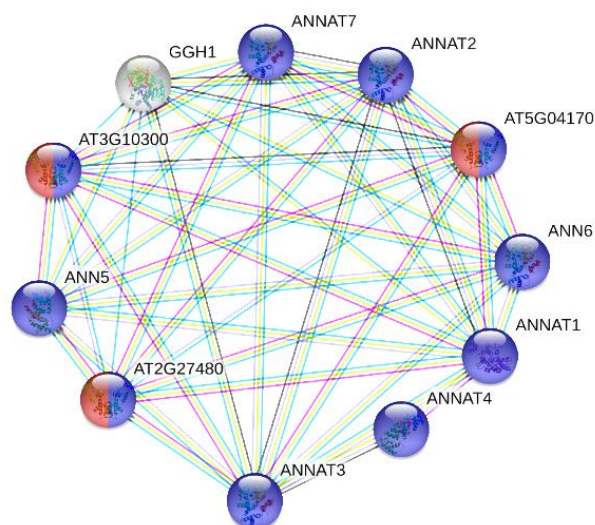

number of nodes: 11  
 number of edges: 47  
 average node degree: 8.55  
 avg. local clustering coefficient: 0.968

expected number of edges: 10  
 PPI enrichment p-value: 1.11e-16  
*your network has significantly more interactions than expected (what does that mean?)*

#### Functional enrichments in your network

*Note: some enrichments may be expected here (why?)*

##### Biological Process (GO)

| GO-term    | description                      | count in gene set | false discovery rate |
|------------|----------------------------------|-------------------|----------------------|
| GO:0009408 | response to heat                 | 7 of 184          | 2.57e-11             |
| GO:0009414 | response to water deprivation    | 7 of 292          | 3.04e-10             |
| GO:0009409 | response to cold                 | 7 of 347          | 4.98e-10             |
| GO:0009651 | response to salt stress          | 7 of 492          | 4.40e-09             |
| GO:0009639 | response to red or far red light | 2 of 186          | 0.0184               |

(more ...)

##### Molecular Function (GO)

| GO-term    | description                                            | count in gene set | false discovery rate |
|------------|--------------------------------------------------------|-------------------|----------------------|
| GO:0005544 | calcium-dependent phospholipid binding                 | 7 of 11           | 2.40e-19             |
| GO:0005509 | calcium ion binding                                    | 10 of 226         | 5.32e-19             |
| GO:0004198 | calcium-dependent cysteine-type endopeptidase activity | 2 of 3            | 9.68e-06             |
| GO:0070011 | peptidase activity, acting on L-amino acid peptides    | 3 of 394          | 0.0020               |

##### Reference publications

| publication   | (year) title                                                  | count in gene set | false discovery rate |
|---------------|---------------------------------------------------------------|-------------------|----------------------|
| PMID:23133603 | (2012) Genome-wide comparative analysis of annexin supe...    | 7 of 11           | 9.57e-19             |
| PMID:23750279 | (2013) A cotton annexin protein AnxGb6 regulates fiber elo... | 7 of 23           | 3.06e-17             |
| PMID:27236332 | (2016) Comprehensive analyses of the annexin gene family...   | 6 of 14           | 2.13e-15             |
| PMID:28935951 | (2017) Overexpression of annexin gene AnnSp2, enhances ...    | 5 of 12           | 1.16e-12             |
| PMID:28422051 | (2017) Annexins as Overlooked Regulators of Membrane Tr...    | 5 of 40           | 1.83e-10             |

(more ...)

##### KEGG Pathways

| pathway  | description                | count in gene set | false discovery rate |
|----------|----------------------------|-------------------|----------------------|
| ath04626 | Plant-pathogen interaction | 3 of 165          | 7.19e-05             |

| Reactome Pathways                     |                                         |                          |                             |
|---------------------------------------|-----------------------------------------|--------------------------|-----------------------------|
| <i>pathway</i>                        | <i>description</i>                      | <i>count in gene set</i> | <i>false discovery rate</i> |
| <a href="#">ATH-109582</a>            | Hemostasis                              | 9 of 154                 | 8.47e-18                    |
| <a href="#">ATH-6798695</a>           | Neutrophil degranulation                | 10 of 533                | 9.68e-16                    |
| <a href="#">ATH-114608</a>            | Platelet degranulation                  | 6 of 50                  | 1.06e-13                    |
| <a href="#">ATH-1474228</a>           | Degradation of the extracellular matrix | 3 of 9                   | 2.77e-08                    |
| <a href="#">ATH-425561</a>            | Sodium/Calcium exchangers               | 3 of 10                  | 2.88e-08                    |
| (more ...)                            |                                         |                          |                             |
| UniProt Keywords                      |                                         |                          |                             |
| <i>keyword</i>                        | <i>description</i>                      | <i>count in gene set</i> | <i>false discovery rate</i> |
| <a href="#">KW-0111</a>               | Calcium/phospholipid-binding            | 7 of 8                   | 1.47e-20                    |
| <a href="#">KW-0041</a>               | Annexin                                 | 7 of 8                   | 1.47e-20                    |
| <a href="#">KW-0106</a>               | Calcium                                 | 10 of 437                | 6.93e-17                    |
| <a href="#">KW-0677</a>               | Repeat                                  | 10 of 3072               | 1.25e-08                    |
| <a href="#">KW-0007</a>               | Acetylation                             | 6 of 840                 | 1.10e-06                    |
| (more ...)                            |                                         |                          |                             |
| PFAM Protein Domains                  |                                         |                          |                             |
| <i>domain</i>                         | <i>description</i>                      | <i>count in gene set</i> | <i>false discovery rate</i> |
| <a href="#">PF00191</a>               | Annexin                                 | 7 of 8                   | 5.50e-21                    |
| <a href="#">PF13202</a>               | EF hand                                 | 2 of 119                 | 0.0031                      |
| INTERPRO Protein Domains and Features |                                         |                          |                             |
| <i>domain</i>                         | <i>description</i>                      | <i>count in gene set</i> | <i>false discovery rate</i> |
| <a href="#">IPR037104</a>             | Annexin superfamily                     | 7 of 8                   | 1.01e-20                    |
| <a href="#">IPR018502</a>             | Annexin repeat                          | 7 of 8                   | 1.01e-20                    |
| <a href="#">IPR001464</a>             | Annexin                                 | 7 of 8                   | 1.01e-20                    |
| <a href="#">IPR018252</a>             | Annexin repeat, conserved site          | 6 of 7                   | 3.69e-18                    |
| <a href="#">IPR009118</a>             | Annexin D, plant                        | 4 of 5                   | 3.88e-12                    |
| (more ...)                            |                                         |                          |                             |
