# Supplementary material for: Effect of Transgenesis on mRNA and miRNA Profiles in Cucumber Fruits Expressing Thaumatin II
Source: MDPI journal article supplement (doi:10.3390/genes11030334), 2020-03-20
Supplement: s1 [file s1]

Supplementary materials - Results of the SRING molecular network for NF-Y transcription factor (NF-YA10) according to *A. thaliana* database. Blue is Histone-like TF domain (PF00808) and green is core histone domain (PF00125). Blue/green nodes present proteins with both domains (PF00808 and PF00125)

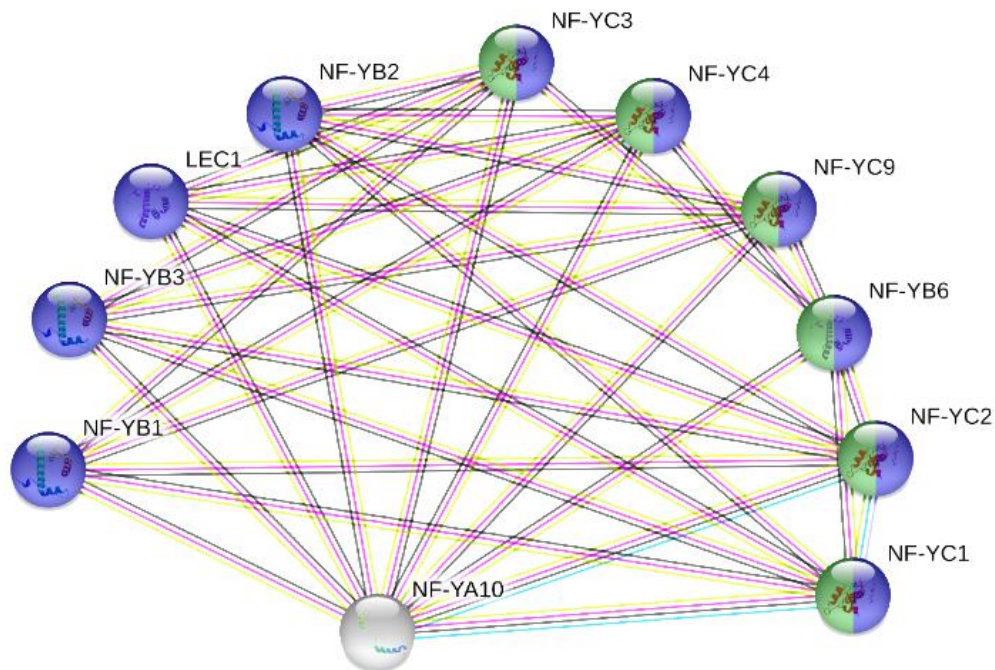

#### Network Stats

number of nodes: 11  
 number of edges: 36  
 average node degree: 6.55  
 avg. local clustering coefficient: 0.42

expected number of edges: 10  
 PPI enrichment p-value: 2.54e-10  
 your network has significantly more interactions  
 than expected (*what does that mean?*)

## Functional enrichments in your network

Note: some enrichments may be expected here ([why?](#))

| Biological Process (GO) |                                            |                   |                      |
|-------------------------|--------------------------------------------|-------------------|----------------------|
| GO-term                 | description                                | count in gene set | false discovery rate |
| GO:2000306              | positive regulation of photomorphogenesis  | 4 of 6            | 4.18e-11             |
| GO:0051252              | regulation of RNA metabolic process        | 11 of 2209        | 4.18e-11             |
| GO:0006355              | regulation of transcription, DNA-templated | 11 of 2167        | 4.18e-11             |
| GO:0006351              | transcription, DNA-templated               | 11 of 1957        | 4.18e-11             |
| GO:0016070              | RNA metabolic process                      | 11 of 3007        | 1.66e-10             |
| (more ...)              |                                            |                   |                      |

| Molecular Function (GO) |                                           |                   |                      |
|-------------------------|-------------------------------------------|-------------------|----------------------|
| GO-term                 | description                               | count in gene set | false discovery rate |
| GO:0046982              | protein heterodimerization activity       | 10 of 103         | 1.54e-22             |
| GO:0003677              | DNA binding                               | 11 of 1983        | 1.46e-12             |
| GO:0003700              | DNA-binding transcription factor activity | 10 of 1333        | 3.03e-12             |
| GO:0043565              | sequence-specific DNA binding             | 6 of 730          | 2.26e-07             |
| GO:0003712              | transcription coregulator activity        | 2 of 70           | 0.00046              |

| Cellular Component (GO) |                              |                   |                      |
|-------------------------|------------------------------|-------------------|----------------------|
| GO-term                 | description                  | count in gene set | false discovery rate |
| GO:0005634              | nucleus                      | 11 of 4229        | 2.39e-08             |
| GO:0016602              | CCAAT-binding factor complex | 3 of 11           | 1.74e-07             |

| Reference publications |                                                                 |                   |                      |
|------------------------|-----------------------------------------------------------------|-------------------|----------------------|
| publication            | (year) title                                                    | count in gene set | false discovery rate |
| PMID:21738795          | (2011) Identification and characterization of NF-Y transcrip... | 10 of 21          | 3.24e-27             |
| PMID:25542200          | (2015) Genome-wide expression analysis of soybean NF-Y ...      | 10 of 23          | 3.38e-27             |
| PMID:22489162          | (2012) Homologous NF-YC2 subunit from Arabidopsis and ...       | 10 of 29          | 1.55e-26             |
| PMID:23527203          | (2013) NUCLEAR FACTOR Y transcription factors have both...      | 10 of 31          | 2.05e-26             |
| PMID:28119722          | (2016) The Arabidopsis thaliana Nuclear Factor Y Transcrip...   | 10 of 53          | 1.87e-24             |
| (more ...)             |                                                                 |                   |                      |

| UniProt Keywords |                                  |                   |                      |
|------------------|----------------------------------|-------------------|----------------------|
| keyword          | description                      | count in gene set | false discovery rate |
| KW-0010          | Activator                        | 10 of 497         | 4.16e-16             |
| KW-0238          | DNA-binding                      | 10 of 1902        | 1.23e-10             |
| KW-0805          | Transcription regulation         | 10 of 1996        | 1.32e-10             |
| KW-0539          | Nucleus                          | 10 of 3725        | 3.77e-08             |
| KW-0938          | Absciscic acid signaling pathway | 3 of 154          | 4.40e-05             |

| PFAM Protein Domains |                                                                 |                   |                      |
|----------------------|-----------------------------------------------------------------|-------------------|----------------------|
| domain               | description                                                     | count in gene set | false discovery rate |
| PF00808              | Histone-like transcription factor (CBF/NF-Y) and archaeal hi... | 10 of 38          | 3.26e-27             |
| PF00125              | Core histone H2A/H2B/H3/H4                                      | 6 of 51           | 4.22e-14             |

| INTERPRO Protein Domains and Features |                                                       |                   |                      |
|---------------------------------------|-------------------------------------------------------|-------------------|----------------------|
| domain                                | description                                           | count in gene set | false discovery rate |
| IPR003958                             | Transcription factor CBF/NF-Y/archaeal histone domain | 10 of 27          | 2.89e-28             |
| IPR009072                             | Histone-fold                                          | 10 of 75          | 1.30e-24             |
| IPR003956                             | Transcription factor, NFYB/HAP3, conserved site       | 5 of 10           | 1.79e-14             |
