# Supplementary material for: Effect of Transgenesis on mRNA and miRNA Profiles in Cucumber Fruits Expressing Thaumatin II
Source: Genes (Basel). 2020 Mar 20;11(3):334. doi: 10.3390/genes11030334 (PMC7140888; doi:10.3390/genes11030334)
Supplement: Supplementary file 1 [file genes-11-00334-s001.zip]

Archive with 9 entries (9 files):
- S5 Results of the functional annotation.xlsx
- S4 Results of the Gene Ontology assignment.xlsx
- S2 Statistics of the short reads mRNA and miRNA.xlsx
- S1 Primers for qPCR.xlsx
- S3 Results of the qPCR analysis.xlsx
- S8 Results of the STRING molecular network for NF-Y.pdf
- S9 Results of the STRING molecular network for Annexin.pdf
- S7 Results of the promotors analysis with PlanCARE.xlsx
- S6 Results of miRNA.xlsx
