# Supplementary material for: Effect of Transgenesis on mRNA and miRNA Profiles in Cucumber Fruits Expressing Thaumatin II
Source: Genes (Basel). 2020 Mar 20;11(3):334. doi: 10.3390/genes11030334 (PMC7140888; doi:10.3390/genes11030334)
Supplement: Supplementary file 1 [file genes-11-00334-s001.zip › S1 Primers for qPCR.xlsx]

## Sheet: startery qPCR sekwencje
Gene	Primer symbol	Line	Product lenght	Sequence 5' - 3'
G20340	T1F	212	81	AAGGTAATAAAGGCGGCAAAC
	T1R			CCATAAGCGGAAGCAAACAA
G7760	T4F	224	149	TAACCCACGCACGAAAGAG
	T4R	225		CGCCAGAAGAGAGGAAGAAG
G15468	T5F	225	156	CTCTCTTTGATTTGGCTGATGG
	T5R			ATTCTCCTGCTGTTGTTGGT
G19558	T7F	224	190	GTTGAGATTGTGATGGGACTTG
	T7R			GGGAGACTTGTGTTCGCT
G19560	T8F	224	222	GATGTCTCTACGATGCTGTT
	T8R			CTTCCTTTCTATGTGATGGGT
G17693	T10F	224	230	CGCCGATTACCAACTCCTC
	T10R			CAAACAACGCCTGACCAAC
G14363	T11F	224	154	TTCCACGACCATCCTTCTATTT
	T11R			GCACTACCACCTTCTTCTTCT
G13243	T28F	224	163	ACAACTCTTCTCCTTCTTCCTC
	T28R			ACTAAACCCTTCTCCTCTACCT
G11114	T12F	224	194	GTAAAGGAGATGTGTGGGCT
	T12R			CGATGGATTTGAGTGCTGTTT
G4326	T17F	212	155	AACCAAACCTACCATCCCAAA
	T17R			CATTCTTCTCGGCTTCGCT
G6726	T21F	224	182	TCTTCCTCCACCCAACTCC
	T21R			TTTCGTTATGCCCACACCC
G12598	T23F	224	196	TCCTCTCTCTCTCTCTCTCTCT
	T23R			CCAGTTTGTGGTGCCATTTC
G10467	T25F	224	172	GCTTTCACCTCTCTGCTTTG
	T25R			CTCATCTTCCTCTTCTCCATTCT
G10813	T26F	224	121	AATCCCACAAATCTTCGCCT
	T26R			GAGAGACAAATGAACCACCAAC
ThaumatinII	THF	212, 224, 225	182	GCCACCTTCGAGATCGTCAAC
	THR			TGTCGTCGAAATAGCAGTCG
nptII	NF	212, 224, 225	110	GTCATCTCACCTTGCTCCT
	NR			GATGTTTCGCTTGGTGGTC
UBI-ep	UF	212, 224, 225	220	CACCAAGCCCAAGAAGATC
	UR			TAAACCTAATCACCACCAGC
