# Supplementary material for: Effect of Transgenesis on mRNA and miRNA Profiles in Cucumber Fruits Expressing Thaumatin II
Source: Genes (Basel). 2020 Mar 20;11(3):334. doi: 10.3390/genes11030334 (PMC7140888; doi:10.3390/genes11030334)
Supplement: Supplementary file 1 [file genes-11-00334-s001.zip › S2 Statistics of the short reads mRNA and miRNA.xlsx]

## Sheet: Arkusz1
Name	Library source	Number of Reads	Number of Bases	Average Quality	% Duplicate
212 replica 1	mRNA	46,172,869	9,234,573,800	36	25.336
212 replica 2	mRNA	50,096,753	10,019,350,600	36	31.631
212 replica 3	mRNA	45,032,954	9,006,590,800	36	27.932
224 replica 1	mRNA	53,001,678	10,600,335,600	36	27.128
224 replica 2	mRNA	46,076,076	9,215,215,200	36	36.469
224 replica 3	mRNA	42,910,826	8,582,165,200	36	29.03
225 replica 1	mRNA	48,933,487	9,786,697,400	36	32.873
225 replica 2	mRNA	48,505,073	9,701,014,600	36	30.689
225 replica 3	mRNA	58,486,376	11,697,275,200	36	30.088
B10-1 replica 1	mRNA	53,896,123	10,779,224,600	35	42.54
B10-1 replica 2	mRNA	51,749,000	10,349,800,000	35	38.829
B10-1 replica 3	mRNA	48,061,118	9,612,223,600	35	32.994
B10-1 replica 1	miRNA	53,443,079	2,672,153,950	37	96.547
B10-1 replica 2	miRNA	54,414,580	2,720,729,000	37	96.538
B10-1 replica 3	miRNA	52,662,855	2,633,142,750	38	96.851
212 replica 1	miRNA	60,655,724	3,032,786,200	38	96.306
212 replica 2	miRNA	44,256,489	2,212,824,450	38	95.347
212 replica 3	miRNA	62,718,319	3,135,915,950	38	96.511
224 replica 1	miRNA	54,596,369	2,729,818,450	38	95.816
224 replica 2	miRNA	59,746,225	2,987,311,250	38	96.127
224 replica 3	miRNA	49,757,735	2,487,886,750	38	96.186
225 replica 1	miRNA	56,833,265	2,841,663,250	38	96.447
225 replica 2	miRNA	54,580,686	2,729,034,300	38	96.168
225 replica 3	miRNA	50,849,815	2,542,490,750	37	95.639
