# Supplementary material for: Effect of Transgenesis on mRNA and miRNA Profiles in Cucumber Fruits Expressing Thaumatin II
Source: Genes (Basel). 2020 Mar 20;11(3):334. doi: 10.3390/genes11030334 (PMC7140888; doi:10.3390/genes11030334)
Supplement: Supplementary file 1 [file genes-11-00334-s001.zip › S3 Results of the qPCR analysis.xlsx]

## Sheet: Arkusz1
Gene	Tested line	Primer efficiency	Control line	Relative expression	St dev	Relative expression	St dev
G10467	224	0.82	B10	1	0.0981873	16.296	0.0424352
G10813	224	0.83	B10	1	0.288988	21.1775	1.59134
G11114	224	0.84	B10	1	0.129373	0.264	0.019
G12598	224	0.7	B10	1	0.323815	5.0575	0.311481
G13243	224	0.8	B10	1	0.0981873	0.675	0.0424352
G14363	224	0.77	B10	1	0.118528	1.17933	0.4338
G15468	225	0.91	B10	1	0.146809	326.044	24.7487
G17693	224	0.81	B10	1	0.0203654	2.10033	1.15245
G19558	224	0.89	B10	1	0.0759951	3.19167	1.33427
G19560	224	0.9	B10	1	0.133863	1.8935	0.560382
G20340	212	0.87	B10	1	0.0105633	2.64967	0.32809
G4326	212	0.84	B10	1	0.0603517	0.028	0.00264575
G6726	224	0.64	B10	1	0.24533	2.18233	0.106702
G7760	224	0.84	B10	1	0.0936194	3.043	0.0977765
G7760	225	0.84	B10	1	0.0910165	3.04	0.0193455
