# Supplementary material for: Effect of Transgenesis on mRNA and miRNA Profiles in Cucumber Fruits Expressing Thaumatin II
Source: Genes (Basel). 2020 Mar 20;11(3):334. doi: 10.3390/genes11030334 (PMC7140888; doi:10.3390/genes11030334)
Supplement: Supplementary file 1 [file genes-11-00334-s001.zip › S4 Results of the Gene Ontology assignment.xlsx]

## Sheet: Arkusz1
SeqName	#GO	GO IDs	GO Names
G10467	5	P:GO:0006950; F:GO:0008289; P:GO:0009628; C:GO:0016020; P:GO:0042221	P:response to stress; F:lipid binding; P:response to abiotic stimulus; C:membrane; P:response to chemical
G10686
G10813	3	F:GO:0005215; P:GO:0006810; C:GO:0016020	F:transporter activity; P:transport; C:membrane
G11114
G1149
G12174	2	P:GO:0006810; F:GO:0008289	P:transport; F:lipid binding
G12465	3	F:GO:0000166; P:GO:0006464; F:GO:0016301	F:nucleotide binding; P:cellular protein modification process; F:kinase activity
G12598	3	F:GO:0003700; P:GO:0006139; P:GO:0009058	F:DNA-binding transcription factor activity; P:nucleobase-containing compound metabolic process; P:biosynthetic process
G12648	3	C:GO:0005634; C:GO:0005737; F:GO:0016787	C:nucleus; C:cytoplasm; F:hydrolase activity
G13243	4	F:GO:0003824; F:GO:0005488; P:GO:0008152; P:GO:0009987	F:catalytic activity; F:binding; P:metabolic process; P:cellular process
G14363	3	F:GO:0003824; F:GO:0005488; P:GO:0008152	F:catalytic activity; F:binding; P:metabolic process
G14398	1	C:GO:0016020	C:membrane
G14592	6	F:GO:0003723; F:GO:0005198; C:GO:0005829; C:GO:0005840; C:GO:0005886; P:GO:0006412	F:RNA binding; F:structural molecule activity; C:cytosol; C:ribosome; C:plasma membrane; P:translation
G14791	1	F:GO:0016787	F:hydrolase activity
G149	2	F:GO:0003824; F:GO:0005488	F:catalytic activity; F:binding
G15513	2	C:GO:0016020; F:GO:0016740	C:membrane; F:transferase activity
G15599
G15648	6	F:GO:0005515; C:GO:0005622; P:GO:0006464; P:GO:0007049; F:GO:0016301; F:GO:0030234	F:protein binding; C:intracellular; P:cellular protein modification process; P:cell cycle; F:kinase activity; F:enzyme regulator activity
G16954
G17313	7	C:GO:0005576; C:GO:0005618; P:GO:0005975; C:GO:0016020; P:GO:0016043; F:GO:0016740; F:GO:0016787	C:extracellular region; C:cell wall; P:carbohydrate metabolic process; C:membrane; P:cellular component organization; F:transferase activity; F:hydrolase activity
G17428
G17693	2	P:GO:0009058; F:GO:0016740	P:biosynthetic process; F:transferase activity
G18039	7	F:GO:0003824; P:GO:0006629; P:GO:0006950; P:GO:0009628; P:GO:0009719; P:GO:0009987; P:GO:0042221	F:catalytic activity; P:lipid metabolic process; P:response to stress; P:response to abiotic stimulus; P:response to endogenous stimulus; P:cellular process; P:response to chemical
G1817	3	F:GO:0003824; F:GO:0005488; P:GO:0008152	F:catalytic activity; F:binding; P:metabolic process
G18456	2	C:GO:0016020; C:GO:0016021	C:membrane; C:integral component of membrane
G19558	4	F:GO:0005488; P:GO:0006629; P:GO:0009058; P:GO:0009987	F:binding; P:lipid metabolic process; P:biosynthetic process; P:cellular process
G19560	5	F:GO:0003824; C:GO:0005622; P:GO:0006629; P:GO:0009058; P:GO:0009987	F:catalytic activity; C:intracellular; P:lipid metabolic process; P:biosynthetic process; P:cellular process
G21621	1	F:GO:0016787	F:hydrolase activity
G3425	5	F:GO:0003677; F:GO:0003700; C:GO:0005634; P:GO:0006139; P:GO:0009058	F:DNA binding; F:DNA-binding transcription factor activity; C:nucleus; P:nucleobase-containing compound metabolic process; P:biosynthetic process
G3896	1	P:GO:0009791	P:post-embryonic development
G4326	6	F:GO:0005515; C:GO:0005730; C:GO:0005773; C:GO:0005783; C:GO:0005794; C:GO:0016020	F:protein binding; C:nucleolus; C:vacuole; C:endoplasmic reticulum; C:Golgi apparatus; C:membrane
G6182	7	F:GO:0000166; F:GO:0005515; C:GO:0005634; C:GO:0005737; P:GO:0006464; P:GO:0007165; F:GO:0016301	F:nucleotide binding; F:protein binding; C:nucleus; C:cytoplasm; P:cellular protein modification process; P:signal transduction; F:kinase activity
G6441	6	F:GO:0003824; F:GO:0005488; C:GO:0005576; P:GO:0006091; P:GO:0009856; P:GO:0009908	F:catalytic activity; F:binding; C:extracellular region; P:generation of precursor metabolites and energy; P:pollination; P:flower development
G6726	3	F:GO:0005215; P:GO:0006810; C:GO:0016020	F:transporter activity; P:transport; C:membrane
G6838
G6936
G7198	3	F:GO:0005488; C:GO:0005576; C:GO:0005618	F:binding; C:extracellular region; C:cell wall
G7760
G828	6	C:GO:0005737; P:GO:0005975; P:GO:0006091; P:GO:0009058; F:GO:0016740; F:GO:0016787	C:cytoplasm; P:carbohydrate metabolic process; P:generation of precursor metabolites and energy; P:biosynthetic process; F:transferase activity; F:hydrolase activity
G8549	2	F:GO:0003723; F:GO:0004518	F:RNA binding; F:nuclease activity
G9940	8	P:GO:0006464; P:GO:0006950; P:GO:0007165; F:GO:0008289; P:GO:0009719; F:GO:0030234; F:GO:0038023; P:GO:0042221	P:cellular protein modification process; P:response to stress; P:signal transduction; F:lipid binding; P:response to endogenous stimulus; F:enzyme regulator activity; F:signaling receptor activity; P:response to chemical
G9998	9	C:GO:0005618; C:GO:0005783; C:GO:0005886; P:GO:0006810; P:GO:0006950; P:GO:0007275; F:GO:0008289; P:GO:0009605; P:GO:0009607	C:cell wall; C:endoplasmic reticulum; C:plasma membrane; P:transport; P:response to stress; P:multicellular organism development; F:lipid binding; P:response to external stimulus; P:response to biotic stimulus
