# Supplementary material for: Effect of Transgenesis on mRNA and miRNA Profiles in Cucumber Fruits Expressing Thaumatin II
Source: Genes (Basel). 2020 Mar 20;11(3):334. doi: 10.3390/genes11030334 (PMC7140888; doi:10.3390/genes11030334)
Supplement: Supplementary file 1 [file genes-11-00334-s001.zip › S5 Results of the functional annotation.xlsx]

## Sheet: Arkusz1
Gene C. sativus	A. thaliana protein functions	Line	Primers name	RNA-seq	BLAST NCBI	Pfam	InterPro	Prosite	TargetP	WolfPsort
G20340	lncRNA	GM1	T1	DOWN	None predicted	None predicted	None predicted	None predicted	None predicted	None predicted
G4326	SPFH/Band 7/PHB domain-containing membrane associated protein	GM1	T17	DOWN	PREDICTED: erlin-2-B	SPFH domain / Band 7 - family	Band-7 domain	None predicted	chloroplast	plastid
G14398	Uncharacterized protein	GM1 GM3	T16	UP	PREDICTED: uncharacterized protein LOC101218166 [Cucumis sativus]	Protein of unknown function DUF604	Protein of unknown function DUF604	None predicted	mitochondrial	plastid
G9998	glycosylphosphatidylinositol-anchored lipid protein transfer 1	GM2		UP	PREDICTED: non-specific lipid transfer protein GPI-anchored 1 [Cucumis sativus]	Probable lipid transfer	Bifunctional inhibitor/plant lipid transfer protein/seed storage helical domain	Tubulin subunits alpha, beta, and gamma	chloroplast	endoplasmatic reticulum
G1817	Elicitor-activated gene 3-1; Involved in lignin biosynthesis. Catalyzes the final step specific for the production of lignin monomers. Catalyzes the NADPH-dependent reduction of coniferaldehyde, 5- hydroxyconiferaldehyde, sinapaldehyde, 4-coumaraldehyde and caffeyl aldehyde to their respective alcohols	GM2	T18	UP	probable mannitol dehydrogenase-like [Cucumis sativus]	Alcohol dehydrogenase GroES-like domain, Zinc-binding dehydrogenase	GroES-like superfamily, Polyketide synthase, enoylreductase domain	Zinc-containing alcohol dehydrogenases	chloroplast	None predicted
G12174	Lipid transfer protein 4; Plant non-specific lipid-transfer proteins transfer phospholipids as well as galactolipids across membranes. May play a role in wax or cutin deposition in the cell walls of expanding epidermal cells and certain secretory tissues (By similarity)	GM2	T27	UP	PREDICTED: non-specific lipid-transfer protein 1 [Cucumis sativus]	Protease inhibitor/seed storage/LTP family	Plant lipid transfer protein/Par allergen	Plant lipid transfer protein	signal peptide	extracellular
G10686	not found	GM2		UP	hypothetical protein Csa_7G037600 [Cucumis sativus]	Glycine rich protein family	Glycine rich protein	EGF-like domain	signal peptide	vacuoles
G10467	Annexin 3	GM2	T25	UP	annexin D3-like	annexin	annexin D	annexin domain	plastid	mitochondrial
G17693	Chalcone synthase; The primary product of this enzyme is 4,2’,4’,6’- tetrahydroxychalcone (also termed naringenin-chalcone or chalcone) which can under specific conditions spontaneously isomerize into naringenin	GM2	T10	UP	PREDICTED: chalcone synthase 2	Chalcone and stilbene synthase	stilben and chalcon synthase	chalcon synthase	other	cytoplasm
G149	synthase	GM2		UP	PREDICTED: (-)-germacrene D synthase-like [Cucumis sativus]	Terpene synthase family, metal binding domain	Terpenoid cyclases/protein prenyltransferase alpha-alpha toroid	Terpene synthase, N-terminal domain	other	chloroplast
G12598	Nuclear factor Y, subunit A10; Stimulates the transcription of various genes by recognizing and binding to a CCAAT motif in promoters	GM2	T24	UP	PREDICTED: nuclear transcription factor Y subunit A-10-like isoform X2	Transcription factor that binding the CCAAT sequence (CBF-B / NF-YA) subunit B	Nuclear transcriptionfactor Y subunit A	Nuclear transcriptionfactor Y subunit A	other	nuclear
G10813	MATE efflux family protein	GM2	T26	UP	PREDICTED: protein TRANSPARENT TESTA 12	MatE domain	antibacterial protein	None predicted	-	plastid
G15513	not found	GM2		UP	PREDICTED: protein O-glucosyltransferase 1-like [Cucumis sativus]	Glycosyl transferase family 90	Glycosyl transferase CAP10 domain	Glycosyl transferase 90	other	chloroplast
G17313	Xyloglucan:xyloglucosyl transferase; Catalyzes xyloglucan endohydrolysis (XEH) and/or endotransglycosylation (XET). Cleaves and religates xyloglucan polymers, an essential constituent of the primary cell wall, and thereby participates in cell wall construction of growing tissues	GM2	T2	DOWN	xyloglucan endotransglycosylase [Cucumis sativus]	Glycosyl hydrolases family 16 / Xyloglucan endo-transglycosylase (XET) C-terminus	Xyloglucan endo-transglycosylase, C-terminal	Glycosyl hydrolases family 16 (GH16) domain	signal peptide	chloroplast
G17428	not found	GM2		DOWN	PREDICTED: uncharacterized protein LOC101218869 [Cucumis sativus]	Domain of unknown function (DUF1338)	Domain of unknown function DUF1338	Domain of unknown function DUF1338	chloroplast	chloroplast
G18456	not found	GM2		UP	PREDICTED: uncharacterized protein LOC101223225 [Cucumis sativus]	None predicted	Tetratricopeptide-like helical domain superfamily	None predicted	other	chloroplast
G6838	Restriction endonuclease, type II-like protein	GM2	T22	DOWN	PREDICTED: uncharacterized protein LOC101223120 isoform X1 [Cucumis sativus]	YqaJ-like viral recombinase domain	YqaJ viral recombinase	N-myristoylation site, Protein kinase C phosphorylation site	chloroplast	chloroplast
G6441	Plantacyanin; Forms a concentration gradient along the pollen tube growth path, with a lower level in the stigma papilla cell wall and a higher level in the transmitting tract extracellular matix of the style	GM2	T15	UP	PREDICTED: basic blue protein [Cucumis sativus]	Plastocyanin-like domain	Phytocyanin domain	Phytocyanin domain	mitochondrial	cytoplasmatic
G9940	acyl-CoA N-acyltransferases-like protein	GM2	T13	UP	PREDICTED: MLP-like protein 423	bet-v-1 - protein family (patoghen-related)	Bet-v-1-like	None predicted	other	cytoplasmatic
G12465	Serine threonine-protein kinase	GM2		DOWN	PREDICTED: serine/threonine-protein kinase AFC1 isoform X2 [Cucumis sativus]	Protein kinase domain	Serine/threonine-protein kinase, active site	Protein kinase domain	other	cytosol
G12648	Plant non-specific lipid-transfer proteins transfer phospholipids as well as galactolipids across membranes. May play a role in wax or cutin deposition in the cell walls of expanding epidermal cells and certain secretory tissues (By similarity)	GM2		UP	PREDICTED: ovarian cancer-associated gene 2 protein homolog [Cucumis sativus]	Serine hydrolase (FSH1)	Serine hydrolase FSH	FSH1	other	cytosol
G14592	ribosomal protein L19	GM2		UP	PREDICTED: 60S ribosomal protein L19-3-like [Cucumis sativus]	Ribosomal protein L19e	60S ribosomal protein L19	Ribosomal protein L19e	chloroplast	cytosol
G3896	Pollen proteins Ole e I like	GM2		UP	PREDICTED: LOW QUALITY PROTEIN: uncharacterized protein LOC101204870 [Cucumis sativus]	Pollen proteins Ole e I like	Protodermal factor 1	Protodermal factor 1	signal peptide	extracellular
G14791	GDSL esterase lipase	GM2		UP	PREDICTED: GDSL esterase/lipase At3g48460 [Cucumis sativus]	GDSL-like Lipase/Acylhydrolase	GDSL-like Lipase / hydrolase	GDSL-like Lipase / hydrolase	mitochondrial	mitochondrial
G15599	thylakoid lumenal 17.4 kDa protein	GM2		DOWN	PREDICTED: thylakoid lumenal 17.4 kDa protein, chloroplastic [Cucumis sativus]	Pentapeptide repeats (9 copies)	pentapeptide repeats	Pentapeptide repeats	other	mitochondrial
G1149	lncRNA	GM2		UP	None predicted	None predicted	None predicted	None predicted	None predicted	None predicted
G853	lncRNA	GM2		UP	None predicted	None predicted	None predicted	None predicted	None predicted	None predicted
G16954	Protein of unknown function (DUF1685)	GM2		DOWN	PREDICTED: uncharacterized protein LOC101213862 [Cucumis sativus]	Protein of unknown function (DUF1685)	Protein of unknown function DUF1685	Protein of unknown function DUF1685	other	nuclear
G21621	GDSL esterase/lipase	GM2	T9	UP	PREDICTED: GDSL esterase/lipase At5g33370-like [Cucumis sativus]	None predicted	SGNH hydrolase superfamily	Protein kinase C phosphorylation site	mitochondrial	nuclear
G3425	ARIA-interacting double AP2 domain protein; Probably acts as a transcriptional activator. Binds to the GCC-box pathogenesis-related promoter element. May be involved in the regulation of gene expression by stress factors and by components of stress signal transduction pathways	GM2	T19	UP	PREDICTED: AP2-like ethylene-responsive transcription factor At1g16060 [Cucumis sativus]	AP2 domain	AP2/ERF domain	AP2/ERF domain	chloroplast	nuclear
G6936	Probable transcription factor that binds specifically to the core DNA sequence 5’-GGTTAA-3’. May act as a molecular switch in response to light signals	GM2	T3	DOWN	PREDICTED: trihelix transcription factor GT-1 isoform X2	Myb-like domain /SANT-binding DNA	Myb-like domain	Myb-like domain	other	nuclear
G828	Trehalose-6-phosphate phosphatase G; Removes the phosphate from trehalose 6-phosphate to produce free trehalose. Trehalose accumulation in plant may improve abiotic stress tolerance	GM2	T20	UP	PREDICTED: probable trehalose-phosphate phosphatase F [Cucumis sativus]	Trehalose-phosphatase	Trehalose-phosphatase	Protein kinase C phosphorylation site	other	nuclear
G11114	Chaperone DnaJ-domain containing protein	GM2	T12	DOWN	PREDICTED: uncharacterized protein LOC101223022	DNA-binding protein	DNA-binding domain, chaperon domain	DNA-binding domain	mitochondrial	plastid
G13243	Cystathionine gamma-synthase; Catalyzes the first committed step of methionine (Met) biosynthesis. Catalyzes the formation of L-cystathionine from homoserine esters and L-cysteine, via a gamma-replacement reaction. Substrate preference for cystathionine synthesis is O- phospho-L-homoserine (OPH) > O(4)-succinyl-L-homoserine (OSH) >> O-acetyl-L-homoserine (OAH). Is able, at extremely low rate, to …	GM2	T28	DOWN	PREDICTED: cystathionine gamma-synthase 1, chloroplastic	PLP dependent Cys / Met metabolism enzyme	pyridoxal phosphate-dependent transferase	alanine-rich region	mitochondrial	plastid
G14363	NAD(P)H dehydrogenase B4; Alternative NADH-ubiquinone oxidoreductase which catalyzes the oxidation of mitochondrial NADH does not translocate protons across the inner mitochondrial membrane (By similarity). NAD(P)H dehydrogenase; more efficient on NADH	GM2	T11	UP	PREDICTED: external alternative NAD(P)H-ubiquinone oxidoreductase B2, mitochondrial	Pyroxidium disulfide oxidase	FAD/NAD-binding domain	calcium-binding domain	mitochondrial	plastid
G19558	Acyl carrier protein 4; Carrier of the growing fatty acid chain in fatty acid biosynthesis	GM2	T7	UP	PREDICTED: acyl carrier protein 1, chloroplastic	None predicted	Zinc-finger domain	transporter	plastid	plastid
G19560	Camelliol C synthase 1; Converts oxidosqualene to camelliol C. Minor production of achilleol and beta-amyrin	GM2	T8	UP	PREDICTED: isomultiflorenol synthase-like	squalen cyclase	squalen cyclase	terpen synthase	other	plastid
G6726	Polyol transporter 5; Plasma membrane broad-spectrum sugar-proton symporter. Mediates the uptake of linear polyols such as sorbitol, xylitol, erythritol or glycerol. Can transport the cyclic polyol myo- inositol and different hexoses, pentoses (including ribose), tetroses and sugar alcohols	GM2	T21	UP	PREDICTED: putative polyol transporter 2	sugar transporter	inositol sugar transporter	MFS sugar transporter	other	plastid
G8549	Ribonuclease T2	GM2	T23	UP	PREDICTED: ribonuclease 1 isoform X1 [Cucumis sativus]	Ribonuclease T2 family	Ribonuclease T2-like	N-glycosylation site	mitochondrial	plastid
G7198	germin-like protein	GM2		UP	PREDICTED: auxin-binding protein ABP19a [Cucumis sativus]	Cupin	Germin	RmlC-like jelly roll fold	signal peptide	vacuoles
G7760	Pentotricopeptide repeat-containing protein	GM2GM3	T4	UP	PREDICTED: pentatricopeptide repeat-containing protein At3g49740 isoform X2	pentatricopeptide repeat protein	pentatricopeptide repeat protein	pentatricopeptide repeat protein	other	nuclear
G10371	lncRNA	GM3		UP	None predicted	None predicted	None predicted	None predicted	None predicted	None predicted
G6182	Calcium and calcium calmodulin-dependent serine. May play a role in signal transduction pathways that involve calcium as a second messenger	GM3	T6	UP	hypothetical protein Csa_6G052030 [Cucumis sativus]	Protein kinase domain, EF-hand domain pair	Protein kinase domain, EF-hand domain	Protein kinase domain	signal peptide	chloroplast
G15468	lncRNA	GM3	T5	UP	PREDICTED: cyclin-dependent kinases regulatory subunit 1-like	None predicted	None predicted	None predicted	None predicted	None predicted
G20381	lncRNA	GM3		UP	None predicted	None predicted	None predicted	None predicted	None predicted	None predicted

## Sheet: Arkusz2
Cucsat.PASA.G853
Cucsat.PASA.G14592
Cucsat.PASA.G9998
Cucsat.PASA.G10686
Cucsat.PASA.G14791
Cucsat.PASA.G149
Cucsat.PASA.G3896
Cucsat.PASA.G7198
Cucsat.PASA.G12648
Cucsat.PASA.G1149
Cucsat.PASA.G15513
Cucsat.PASA.G18456
Cucsat.PASA.G16954
Cucsat.PASA.G15599
Cucsat.PASA.G12465
Cucsat.PASA.G17428
Cucsat.PASA.G10371
Cucsat.PASA.G20381

## Sheet: Arkusz3
	Wiązanie DNA, RNA i białek
G6936	F:Wiązanie DNA	Prawdopodobny czynnik transkrypcyjny wiążący się specyficznie do nici DNA o sekwencji 5’-GGTTAA-3’. Może działać jako włącznik molekularny w odpowiedzi na sygnały świetlne	GT-1	AT1G13450
G3425	F: aktywność czynnika transkrypcyjnego wiążącego DNA; P:regulacja transkrypcji	Białko z dwoma domenami AP2 wchodzące w interakcje z ARIA; Prawdopodobnie działa jako aktywator transkrypcji. Wiąże się z kasetą GCC element promotora związanego z patogenezą. Może być zaangażowany w regulację ekspresji genów przez czynniki stresowe i przez komponenty szlaku transdukcji sygnału w odpowiedzi na czynniki stresowe	ADAP
			AT1G16060
G12598	F: aktywność czynnika transkrypcyjnego wiążącego DNA; P: regulacja transkrypcji	Jądrowy czynnik Y, podjednostka A10; Stymuluje transkrypcje genów przez rozpoznawanie i wiązanie do motywu CCAAT w promotorze	NF-YA10
			AT5G06510
G8549	F: wiązanie RNA; F:aktywność rybonukleazy T2	Rybonukleaza T2	AT1G14220
G7760	F:wiązanie białek	Białko z motywem pentatrikopeptydowym	AT3G49740
	Procesy utleniania i redukcji
G1817	P: procesy utleniania i redukcji	Gen 3-1 aktywowany przez elicytor; Zaangażowany w biosyntezę ligniny. Katalizuje końcowy etap produkcji monomerów ligniny. Katalizuje zależną od NADPH redukcję koniferaldehydu, 5-hydroksykoniferaldehydu, sinapaldehydu, 4-kumaraldehydu i aldehydu kofylowego do ich alkoholi	ELI3-1
			AT4G37980
G6441	F:aktywność transportera elektronów	Plantacyjanina; Tworzy gradient stężenia wzdłuż ścieżki wzrostu łagiewki pyłkowej, z niższym poziomem w ścianie komórkowej znamienia słupka i wyższym poziomem w macierzy zewnątrzkomórkowej słupka	ARPN	AT2G02850
	Transport
G6726	C:integralny składnik błony komórkowej; F:aktywność transportera przezbłonowego; P:transport przez błonę komórkową	Transporter polioli 5; Symporter protonów w błonie komórkowej o szerokim spectrum. Zarządza pobieraniem liniowych polioli takich jak: sorbitol, ksylitol, erytrol i glicerol. Może transportować cykliczne poliole: mioinozytol i heksozy, pentozy (włączając rybozę), tetrozy i alkohole cukrowe	PMT5	AT2G03480
			AT2G03480
G10813	P:transport transmembranowy substancji; F:aktywność transportera przezbłonowego; F:aktywność antyportera; C:błona komórkowa	Białko z rodziny MATE	AT3G21690
G12174	P:transport lipidów; F:wiązanie lipidów	Białko transportujące lipidy; Niespecyficzne białko roślinne transportujące lipidy przez błonę komórkową. Może odgrywać rolę w przebudowie wosków i kutyny w ścianie komórkowej rozszerzających się komórek skórki i tkanek wydzielniczych	LTP4
			AT5G59310
	Wiązanie jonów
G14363	F:wiązanie jonów wapnia; F:aktywność oksydoreduktazy; P:proces utleniania i redukcji	Dehydrogenaza NAD(P)H B4; Alternatywna oksydoreduktaza NADH-ubichinon, która katalizuje utlenianie mitochondrialnego NADH, nie przemieszcza protonów przez wewnętrzną błonę mitochondrialną	NDB 1,2,3,4
			AT4G28220
G10467	F:wiązanie jonów wapnia; F:wiązanie fosfolipidów zależne od wapnia	Aneksyna 3	ANNAT3
			AT2G38760
G13243	F:aktywność katalityczna; F:wiązanie fosforanu pirydoksalu	Syntaza gamma cystationiny; Katalizuje pierwszy etap biosyntezy metioniny. Katalizuje formowanie L-cystationiny z estrów homoseryny I L-cysteiny, przez reakcję przemieszczania gamma. Preferowane substraty przy biosyntezie to: O- fosfo-L-homoseryna (OPH) > O(4)-sukcynylo-L-homoseryna (OSH) >> O-acetylo-L-homoseryna (OAH). Jest w stanie, przy bardzo niskim współczynniku, katalizować eliminację gamm…	MTO1
			AT3G01120
	Procesy biosyntezy
G19558	P:process biosyntezy kwasów tłuszczowych	Białko przenoszące grupy acylowe 4; Nośnik rosnącego łańcucha kwasów tłuszczowych w biosyntezie kwasów tłuszczowych	ACP4
			AT4G25050
G17693	P:process biosyntezy; F:aktywność transferazy, przenoszenie grup acylowych innych niż amino-acylowe	Syntaza chalkonowa; Pierwotny product tego enzyme to 4,2’,4’,6’- tetrahydroksychalkon (chalkon) które może w szczególnych przypadkach spontanicznie izomeryzować do naringeniny	TT4
			AT5G13930
G828	F:aktywność katalityczna; P:proces biosyntezy trehalozy	Fosfataza G trehalozo-6-fosforanowa; Usuwa fosforan z 6-fosforanu trehalozy w celu uzyskania wolnej trehalozy. Akumulacja trehalozy w roślinie może poprawić tolerancję stresu abiotycznego	TPPF
			AT4G12430
	Inne
G9940	P:odpowiedź obronna	Białko podobne do MLP 423	MLP423
			AT1G24020
G19560	F:aktywność transferazy wewnątrzkomórkowej	Syntaza beta-amyryny; Przekształca oksydokwalen w beta-amyrynę	BAS
			AT3G11630
G17313	F:aktywność hydrolazy, hydrozylacja składników O-glikozylowych; P:procesy metaboliczne węglowodorów	Ksyloglukan: ksyloglukozylotransferaza; Katalizuje endohydrolizę ksyloglukanu (XEH) i / lub endotransglikozylację (XET). Rozszczepia się i wyzwala polimery ksyloglukanu, niezbędny składnik pierwotnej ściany komórkowej, a tym samym uczestniczy w budowie ściany komórkowej rosnących tkanek	XTH16
			AT3G23730
	Brak GO
G6182		Seryna zależna od kalmoduliny wapniowej i wapnia. Może odgrywać rolę w szlakach przekazywania sygnału, które wiążą wapń jako drugi przekaźnik	CPK2
			AT3G10660
G21621		GDSL esteraza/lipaza	AT5G33370
G11114		Białko zawierające białko opiekuńcze	AT5G37380
G14398		Niescharakteryzowane białko	AT1G07850
G4326		Związane z błoną białko zawierające domenę SPFH / Band 7 / PHB	AT2G03510
G6838		Endonukleaza restrykcyjna, białko typu II	AT1G67660
G18039		Białko zawierające domenę RING / U-box; Zapewnia homeostazę kwasu abscysynowego na poziomie potranslacyjnym, prawdopodobnie poprzez zależną od substratu degradację ubikwityny / proteasomu	XERICO
			AT2G04240
