# Supplementary material for: Effect of Transgenesis on mRNA and miRNA Profiles in Cucumber Fruits Expressing Thaumatin II
Source: Genes (Basel). 2020 Mar 20;11(3):334. doi: 10.3390/genes11030334 (PMC7140888; doi:10.3390/genes11030334)
Supplement: Supplementary file 1 [file genes-11-00334-s001.zip › S6 Results of miRNA.xlsx]

## Sheet: Arkusz1
Control line	Line	miRNA	sequence	log2FoldChange	pvalue	No of targets	Targets
B10	212	320	CCGCAGGAGAGATGACACCCAC	-2.09723	5.24e-05	20	"G8689";"G7567";"G14764";"G8316";"G10826";"G18275";"G9935";"G10456";"G158";"G3862";"G519";"G6726";"G6701";"G10534";"G606";"G10366";"G18859";"G18787";"G9524";"G4637"
B10	224	27	AGTGATCGGTCATTTTTAGTGATT	-2.01494	0.000227538	15	"G8241";"G19620";"G14508";"G9484";"G2060";"G13545";"G6456";"G8706";"G7692";"G10659";"G8656";"G14669";"G7209";"G4077";"G12332"
B10	224	42	AAGCTCAGGAGGGATAGCGCC	2.07747	6.23e-06	22	"G18117";"G6866";"G419";"G330";"G233";"G12185";"G8072";"G12958";"G10580";"G445";"G5331";"G18807";"G15080";"G3692";"G6030";"G15590";"G3240";"G14342";"G12170";"G6425";"G10822";"G14584"
B10	224	93	ACACGTACCTAGAAGTTGAAGCCT	2.29892	8.7e-05	21	"G18119";"G6553";"G6343";"G3317";"G1685";"G12194";"G9570";"G2872";"G5705";"G20223";"G19746";"G6211";"G8501";"G6090";"G16487";"G14324";"G9727";"G2249";"G8933";"G11480";"G14401"
B10	224	123	TATTGGTCCGGTTCACTCAGA	3.54742	3.7e-11	25	"G10870";"G293";"G294";"G227";"G4193";"G334";"G365";"G52";"G19801";"G5172";"G1070";"G10664";"G13447";"G13564";"G5170";"G209";"G14822";"G19842";"G18222";"G2827";"G9504";"G12764";"G16116";"G9837";"G3189"
B10	224	131	TTCTCTCCCTCAAGGGCTTCGA	-2.84365	0.000111115	24	"G18127";"G170";"G16807";"G19578";"G399";"G7539";"G14388";"G5177";"G3156";"G18574";"G7123";"G16231";"G5185";"G3967";"G13125";"G376";"G12647";"G12498";"G19160";"G1653";"G6648";"G11320";"G10467";"G6113"
B10	224	206	AATTTTACTTAAGATGAACCGAGA	2.23005	0.00026965	18	"G16225";"G14826";"G12820";"G5987";"G5022";"G14898";"G5094";"G11320";"G16761";"G19128";"G14600";"G18582";"G19";"G7311";"G16952";"G11166";"G9002";"G6885"
B10	224	218	TAGCCAAAAATGACTTGCCTGC	-3.39218	4.52e-07	28	"G12598";"G196";"G14269";"G16593";"G6376";"G6092";"G12659";"G21706";"G13151";"G16400";"G3007";"G13060";"G65";"G10747";"G183";"G15509";"G581";"G10804";"G11403";"G19445";"G5334";"G21258";"G2620";"G12511";"G16282";"G5722";"G18862";"G10630"
B10	224	222	TGAGCCAAACATGACTTGCCT	-3.71955	4.96e-07	29	"G12598";"G196";"G8662";"G11940";"G14583";"G1262";"G878";"G15353";"G12251";"G1161";"G9206";"G10747";"G973";"G1275";"G18000";"G8120";"G1839";"G6202";"G18633";"G14534";"G20908";"G11220";"G219";"G6819";"G12222";"G18072";"G10291";"G18869";"G13151"
B10	224	289	TATTGGCCCGGTTCACTCAGA	3.27916	2.45e-09	23	"G294";"G227";"G4193";"G334";"G365";"G52";"G19801";"G13447";"G5170";"G209";"G19842";"G14822";"G16116";"G9837";"G14902";"G214";"G12170";"G11456";"G522";"G12948";"G11911";"G8042";"G16545"
B10	225	206	AATTTTACTTAAGATGAACCGAGA	2.20268	1.42e-05	18	"G16225";"G14826";"G12820";"G5987";"G5022";"G14898";"G5094";"G11320";"G16761";"G19128";"G14600";"G18582";"G19";"G7311";"G16952";"G11166";"G9002";"G6885"
B10	225	218	TAGCCAAAAATGACTTGCCTGC	-2.0873	8.66e-05	28	"G12598";"G196";"G14269";"G16593";"G6376";"G6092";"G12659";"G21706";"G13151";"G16400";"G3007";"G13060";"G65";"G10747";"G183";"G15509";"G581";"G10804";"G11403";"G19445";"G5334";"G21258";"G2620";"G12511";"G16282";"G5722";"G18862";"G10630"
