# Supplementary material for: Effect of Transgenesis on mRNA and miRNA Profiles in Cucumber Fruits Expressing Thaumatin II
Source: Genes (Basel). 2020 Mar 20;11(3):334. doi: 10.3390/genes11030334 (PMC7140888; doi:10.3390/genes11030334)
Supplement: Supplementary file 1 [file genes-11-00334-s001.zip › S7 Results of the promotors analysis with PlanCARE.xlsx]

## Sheet: Arkusz1
Line	Access ID	Site Name	Organism	Position	Strand	sequence	function
212	G20340	A-box	Petroselinum crispum	692	+	CCGTCC	cis-acting regulatory element
212	G20340	AAGAA-motif	Avena sativa	606	-	GAAAGAA
212	G20340	AAGAA-motif	Avena sativa	822	-	GAAAGAA
212	G20340	ABRE	Arabidopsis thaliana	376	+	ACGTG	cis-acting element involved in the abscisic acid responsiveness
212	G20340	ABRE	Arabidopsis thaliana	333	-	ACGTG	cis-acting element involved in the abscisic acid responsiveness
212	G20340	ABRE3a	Zea mays	375	+	TACGTG
212	G20340	ABRE4	Zea mays	375	-	CACGTA
212	G20340	AT~TATA-box	Arabidopsis thaliana	502	-	TATATA
212	G20340	AT~TATA-box	Arabidopsis thaliana	536	-	TATATA
212	G20340	AT~TATA-box	Arabidopsis thaliana	523	-	TATATAAA
212	G20340	AT~TATA-box	Arabidopsis thaliana	595	-	TATATA
212	G20340	AT~TATA-box	Arabidopsis thaliana	527	-	TATATA
212	G20340	AT~TATA-box	Arabidopsis thaliana	534	-	TATATAAA
212	G20340	AT~TATA-box	Arabidopsis thaliana	504	-	TATATA
212	G20340	AT~TATA-box	Arabidopsis thaliana	525	-	TATATA
212	G20340	AT~TATA-box	Arabidopsis thaliana	474	+	TATATA
212	G20340	AT~TATA-box	Arabidopsis thaliana	506	-	TATATA
212	G20340	Box 4	Petroselinum crispum	555	-	ATTAAT	part of a conserved DNA module involved in light responsiveness
212	G20340	CAAT-box	Nicotiana glutinosa	371	+	CAAT
212	G20340	CAAT-box	Nicotiana glutinosa	490	+	CAAT
212	G20340	CAAT-box	Nicotiana glutinosa	360	+	CAAT
212	G20340	CAAT-box	Nicotiana glutinosa	145	+	CAAT
212	G20340	CAAT-box	Nicotiana glutinosa	64	-	CAAT
212	G20340	CAAT-box	Pisum sativum	431	+	CAAAT	common cis-acting element in promoter and enhancer regions
212	G20340	CAAT-box	Nicotiana glutinosa	62	+	CAAT
212	G20340	CAAT-box	Nicotiana glutinosa	5	-	CAAT
212	G20340	CAAT-box	Arabidopsis thaliana	489	+	CCAAT	common cis-acting element in promoter and enhancer regions
212	G20340	CCGTCC motif	Nicotiana tabacum	692	+	CCGTCC
212	G20340	CCGTCC-box	Petroselinum hortense	692	+	CCGTCC
212	G20340	DRE core	Arabidopsis thaliana	752	-	GCCGAC
212	G20340	DRE core	Arabidopsis thaliana	712	+	GCCGAC
212	G20340	G-Box	Pisum sativum	333	+	CACGTT	cis-acting regulatory element involved in light responsiveness
212	G20340	G-box	Arabidopsis thaliana	375	+	TACGTG	cis-acting regulatory element involved in light responsiveness
212	G20340	G-box	Zea mays	269	-	CACGAC	cis-acting regulatory element involved in light responsiveness
212	G20340	MYC	Arabidopsis thaliana	62	+	CAATTG
212	G20340	MYC	Arabidopsis thaliana	761	-	CATGTG
212	G20340	Myb	Arabidopsis thaliana	410	-	TAACTG
212	G20340	Myb	Arabidopsis thaliana	402	+	TAACTG
212	G20340	STRE	Arabidopsis thaliana	811	-	AGGGG
212	G20340	STRE	Arabidopsis thaliana	682	-	AGGGG
212	G20340	Sp1	Oryza sativa	928	-	GGGCGG	light responsive element
212	G20340	Sp1	Oryza sativa	808	-	GGGCGG	light responsive element
212	G20340	TATA	Arabidopsis thaliana	532	-	TATAAAAT
212	G20340	TATA-box	Arabidopsis thaliana	597	-	TATA	core promoter element around -30 of transcription start
212	G20340	TATA-box	Arabidopsis thaliana	525	-	TATATA	core promoter element around -30 of transcription start
212	G20340	TATA-box	Helianthus annuus	523	-	TATAAA	core promoter element around -30 of transcription start
212	G20340	TATA-box	Arabidopsis thaliana	524	-	TATATAA	core promoter element around -30 of transcription start
212	G20340	TATA-box	Arabidopsis thaliana	502	-	TATATA	core promoter element around -30 of transcription start
212	G20340	TATA-box	Arabidopsis thaliana	474	+	TATATA	core promoter element around -30 of transcription start
212	G20340	TATA-box	Arabidopsis thaliana	243	+	TATA	core promoter element around -30 of transcription start
212	G20340	TATA-box	Arabidopsis thaliana	594	-	TATATAA	core promoter element around -30 of transcription start
212	G20340	TATA-box	Arabidopsis thaliana	560	-	TATTTAAA	core promoter element around -30 of transcription start
212	G20340	TATA-box	Helianthus annuus	534	-	TATAAA	core promoter element around -30 of transcription start
212	G20340	TATA-box	Arabidopsis thaliana	535	-	TATATAA	core promoter element around -30 of transcription start
212	G20340	TATA-box	Arabidopsis thaliana	508	-	TATA	core promoter element around -30 of transcription start
212	G20340	TATA-box	Arabidopsis thaliana	506	-	TATATA	core promoter element around -30 of transcription start
212	G20340	TATA-box	Arabidopsis thaliana	504	-	TATATA	core promoter element around -30 of transcription start
212	G20340	TATA-box	Arabidopsis thaliana	595	-	TATATA	core promoter element around -30 of transcription start
212	G20340	TATA-box	Pisum sativum	522	-	TATAAAA	core promoter element around -30 of transcription start
212	G20340	TATA-box	Arabidopsis thaliana	529	-	TATA	core promoter element around -30 of transcription start
212	G20340	TATA-box	Pisum sativum	533	-	TATAAAA	core promoter element around -30 of transcription start
212	G20340	TATA-box	Arabidopsis thaliana	476	+	TATA	core promoter element around -30 of transcription start
212	G20340	TATA-box	Brassica napus	503	-	ATATAT	core promoter element around -30 of transcription start
212	G20340	TATA-box	Brassica napus	475	+	ATATAT	core promoter element around -30 of transcription start
212	G20340	TATA-box	Brassica napus	242	+	ATATAT	core promoter element around -30 of transcription start
212	G20340	TATA-box	Arabidopsis thaliana	536	-	TATATA	core promoter element around -30 of transcription start
212	G20340	TATA-box	Brassica napus	505	-	ATATAT	core promoter element around -30 of transcription start
212	G20340	TATA-box	Brassica napus	528	-	ATATAT	core promoter element around -30 of transcription start
212	G20340	TATA-box	Avena sativa	499	-	TATATTTATATTT	core promoter element around -30 of transcription start
212	G20340	TATA-box	Brassica napus	501	-	ATATAT	core promoter element around -30 of transcription start
212	G20340	TATA-box	Arabidopsis thaliana	81	+	TATA	core promoter element around -30 of transcription start
212	G20340	TATA-box	Avena sativa	538	+	TATATTTATATTT	core promoter element around -30 of transcription start
212	G20340	TATA-box	Oryza sativa	116	+	TACAAAA	core promoter element around -30 of transcription start
212	G20340	TATA-box	Brassica napus	593	+	ATTATA	core promoter element around -30 of transcription start
212	G20340	TATA-box	Brassica napus	537	-	ATATAT	core promoter element around -30 of transcription start
212	G20340	TATA-box	Brassica napus	526	-	ATATAT	core promoter element around -30 of transcription start
212	G20340	TATA-box	Brassica napus	596	-	ATATAT	core promoter element around -30 of transcription start
212	G20340	TATA-box	Arabidopsis thaliana	527	-	TATATA	core promoter element around -30 of transcription start
212	G20340	TATC-box	Oryza sativa	200	-	TATCCCA	cis-acting element involved in gibberellin-responsiveness
212	G20340	TC-rich repeats	Nicotiana tabacum	972	+	GTTTTCTTAC	cis-acting element involved in defense and stress responsiveness
212	G20340	TC-rich repeats	Nicotiana tabacum	919	+	GTTTTCTTAC	cis-acting element involved in defense and stress responsiveness
212	G20340	TC-rich repeats	Nicotiana tabacum	866	+	GTTTTCTTAC	cis-acting element involved in defense and stress responsiveness
212	G20340	TCT-motif	Arabidopsis thaliana	237	-	TCTTAC	part of a light responsive element
212	G20340	Unnamed__4	Petroselinum hortense	843	+	CTCC
212	G20340	Unnamed__4	Petroselinum hortense	718	+	CTCC
212	G20340	Unnamed__4	Petroselinum hortense	688	+	CTCC
212	G20340	Unnamed__4	Petroselinum hortense	659	+	CTCC
212	G20340	Unnamed__4	Petroselinum hortense	666	+	CTCC
212	G20340	Unnamed__4	Petroselinum hortense	364	-	CTCC
212	G20340	WRE3	Pisum sativum	197	-	CCACCT
212	G4326	AAGAA-motif	Avena sativa	322	+	GAAAGAA
212	G4326	ABRE	Arabidopsis thaliana	981	-	CACGTG	cis-acting element involved in the abscisic acid responsiveness
212	G4326	ABRE	Arabidopsis thaliana	982	+	ACGTG	cis-acting element involved in the abscisic acid responsiveness
212	G4326	ABRE	Arabidopsis thaliana	900	+	ACGTG	cis-acting element involved in the abscisic acid responsiveness
212	G4326	ABRE	Arabidopsis thaliana	899	-	CACGTG	cis-acting element involved in the abscisic acid responsiveness
212	G4326	AE-box	Arabidopsis thaliana	155	-	AGAAACTT	part of a module for light response
212	G4326	ARE	Zea mays	69	-	AAACCA	cis-acting regulatory element essential for the anaerobic induction
212	G4326	ARE	Zea mays	163	+	AAACCA	cis-acting regulatory element essential for the anaerobic induction
212	G4326	CAAT-box	Nicotiana glutinosa	773	+	CAAT
212	G4326	CAAT-box	Nicotiana glutinosa	763	-	CAAT
212	G4326	CAAT-box	Nicotiana glutinosa	801	-	CAAT
212	G4326	CAAT-box	Nicotiana glutinosa	376	-	CAAT
212	G4326	CAAT-box	Arabidopsis thaliana	679	-	CCAAT	common cis-acting element in promoter and enhancer regions
212	G4326	CAAT-box	Nicotiana glutinosa	180	+	CAAT
212	G4326	CAAT-box	Pisum sativum	868	+	CAAAT	common cis-acting element in promoter and enhancer regions
212	G4326	CAAT-box	Nicotiana glutinosa	258	+	CAAT
212	G4326	CAAT-box	Nicotiana glutinosa	219	+	CAAT
212	G4326	CAAT-box	Nicotiana glutinosa	845	+	CAAT
212	G4326	CAAT-box	Pisum sativum	839	+	CAAAT	common cis-acting element in promoter and enhancer regions
212	G4326	CAAT-box	Pisum sativum	874	+	CAAAT	common cis-acting element in promoter and enhancer regions
212	G4326	CAAT-box	Nicotiana glutinosa	972	+	CAAT
212	G4326	CAAT-box	Nicotiana glutinosa	582	-	CAAT
212	G4326	CAAT-box	Nicotiana glutinosa	81	+	CAAT
212	G4326	CAAT-box	Nicotiana glutinosa	444	+	CAAT
212	G4326	CAAT-box	Nicotiana glutinosa	103	+	CAAT
212	G4326	CAAT-box	Nicotiana glutinosa	528	-	CAAT
212	G4326	CGTCA-motif	Hordeum vulgare	378	-	CGTCA	cis-acting regulatory element involved in the MeJA-responsiveness
212	G4326	G-Box	Pisum sativum	896	-	CACGTGAAA	cis-acting regulatory element involved in light responsiveness
212	G4326	G-Box	Pisum sativum	981	-	CACGTG	cis-acting regulatory element involved in light responsiveness
212	G4326	G-Box	Pisum sativum	978	-	CACGTGAAA	cis-acting regulatory element involved in light responsiveness
212	G4326	G-Box	Pisum sativum	899	-	CACGTG	cis-acting regulatory element involved in light responsiveness
212	G4326	G-box	Arabidopsis thaliana	981	-	CACGTG	cis-acting regulatory element involved in light responsiveness
212	G4326	G-box	Brassica oleracea	484	+	TAACACGTAG	cis-acting regulatory element involved in light responsiveness
212	G4326	G-box	Arabidopsis thaliana	899	-	CACGTG	cis-acting regulatory element involved in light responsiveness
212	G4326	MRE	Petroselinum crispum	113	+	AACCTAA	MYB binding site involved in light responsiveness
212	G4326	MYC	Arabidopsis thaliana	874	-	CATTTG
212	G4326	MYC	Arabidopsis thaliana	37	-	CATGTG
212	G4326	MYC	Arabidopsis thaliana	560	+	CATGTG
212	G4326	MYC	Arabidopsis thaliana	839	-	CATTTG
212	G4326	P-box	Oryza sativa	993	+	CCTTTTG	gibberellin-responsive element
212	G4326	STRE	Arabidopsis thaliana	461	-	AGGGG
212	G4326	TATA-box	Oryza sativa	404	+	TACAAAA	core promoter element around -30 of transcription start
212	G4326	TCA-element	Nicotiana tabacum	930	+	CCATCTTTTT	cis-acting element involved in salicylic acid responsiveness
212	G4326	TGA-element	Brassica oleracea	601	+	AACGAC	auxin-responsive element
212	G4326	TGACG-motif	Hordeum vulgare	378	+	TGACG	cis-acting regulatory element involved in the MeJA-responsiveness
212	G4326	Unnamed__1	Zea mays	983	+	CGTGG
212	G4326	Unnamed__1	Zea mays	901	+	CGTGG
212	G4326	Unnamed__4	Petroselinum hortense	919	+	CTCC
212	G4326	Unnamed__4	Petroselinum hortense	879	-	CTCC
212	G4326	Unnamed__4	Petroselinum hortense	24	-	CTCC
212	G4326	Unnamed__4	Petroselinum hortense	807	-	CTCC
212	G4326	Unnamed__4	Petroselinum hortense	344	-	CTCC
212	G4326	Unnamed__4	Petroselinum hortense	196	+	CTCC
212	G4326	Unnamed__4	Petroselinum hortense	210	-	CTCC
212	G4326	Unnamed__4	Petroselinum hortense	777	-	CTCC
212	G4326	as-1	Arabidopsis thaliana	378	+	TGACG
212.225	G14398	ARE	Zea mays	141	-	AAACCA	cis-acting regulatory element essential for the anaerobic induction
212.225	G14398	ARE	Zea mays	403	+	AAACCA	cis-acting regulatory element essential for the anaerobic induction
212.225	G14398	ARE	Zea mays	395	-	AAACCA	cis-acting regulatory element essential for the anaerobic induction
212.225	G14398	AT1-motif	Solanum tuberosum	99	-	AATTATTTTTTATT	part of a light responsive module
212.225	G14398	CAAT-box	Arabidopsis thaliana	268	+	CCAAT	common cis-acting element in promoter and enhancer regions
212.225	G14398	CAAT-box	Pisum sativum	97	+	CAAAT	common cis-acting element in promoter and enhancer regions
212.225	G14398	CAAT-box	Pisum sativum	353	+	CAAAT	common cis-acting element in promoter and enhancer regions
212.225	G14398	CAAT-box	Pisum sativum	408	-	CAAAT	common cis-acting element in promoter and enhancer regions
212.225	G14398	CAAT-box	Nicotiana glutinosa	77	-	CAAT
212.225	G14398	CAAT-box	Nicotiana glutinosa	269	+	CAAT
212.225	G14398	CAAT-box	Nicotiana glutinosa	385	+	CAAT
212.225	G14398	CAAT-box	Petunia hybrida	260	-	TGCCAAC	common cis-acting element in promoter and enhancer regions
212.225	G14398	CAAT-box	Pisum sativum	328	-	CAAAT	common cis-acting element in promoter and enhancer regions
212.225	G14398	ERE	Nicotiana glutinos	464	-	ATTTTAAA
212.225	G14398	ERE	Nicotiana glutinos	209	+	ATTTTAAA
212.225	G14398	GT1-motif	Arabidopsis thaliana	29	-	GGTTAA	light responsive element
212.225	G14398	MBSI	Petunia hybrida	60	-	aaaAaaC(G/C)GTTA	MYB binding site involved in flavonoid biosynthetic genes regulation
212.225	G14398	MYB	Arabidopsis thaliana	265	+	CAACCA
212.225	G14398	MYB	Arabidopsis thaliana	483	-	TAACCA
212.225	G14398	MYB	Arabidopsis thaliana	60	+	TAACCA
212.225	G14398	MYB	Arabidopsis thaliana	236	-	TAACCA
212.225	G14398	MYB-like sequence	Arabidopsis thaliana	483	-	TAACCA
212.225	G14398	MYB-like sequence	Arabidopsis thaliana	236	-	TAACCA
212.225	G14398	MYB-like sequence	Arabidopsis thaliana	60	+	TAACCA
212.225	G14398	MYC	Arabidopsis thaliana	407	+	CATTTG
212.225	G14398	MYC	Arabidopsis thaliana	1	+	CATGTG
212.225	G14398	TATA-box	Oryza sativa	144	-	TACAAAA	core promoter element around -30 of transcription start
212.225	G14398	TATA-box	Arabidopsis thaliana	320	-	TATAA	core promoter element around -30 of transcription start
212.225	G14398	TATA-box	Arabidopsis thaliana	321	-	TATA	core promoter element around -30 of transcription start
212.225	G14398	TC-rich repeats	Nicotiana tabacum	6	+	GTTTTCTTAC	cis-acting element involved in defense and stress responsiveness
212.225	G14398	TCA	Pisum sativum	417	-	TCATCTTCAT
212.225	G14398	TCA	Pisum sativum	179	-	TCATCTTCAT
212.225	G14398	TCA-element	Nicotiana tabacum	63	+	CCATCTTTTT	cis-acting element involved in salicylic acid responsiveness
212.225	G14398	Unnamed__4	Petroselinum hortense	442	-	CTCC
224	G10467	AAGAA-motif	Avena sativa	509	-	gGTAAAGAAA
224	G10467	ABRE	Arabidopsis thaliana	837	+	ACGTG	cis-acting element involved in the abscisic acid responsiveness
224	G10467	AE-box	Arabidopsis thaliana	506	-	AGAAACTT	part of a module for light response
224	G10467	AuxRR-core	Nicotiana tabacum	73	+	GGTCCAT	cis-acting regulatory element involved in auxin responsiveness
224	G10467	CAAT-box	Nicotiana glutinosa	165	+	CAAT
224	G10467	CAAT-box	Nicotiana glutinosa	905	+	CAAT
224	G10467	CAAT-box	Nicotiana glutinosa	428	+	CAAT
224	G10467	CCAAT-box	Arabidopsis thaliana	91	-	CCAAT	common cis-acting element in promoter and enhancer regions
224	G10467	CAAT-box	Pisum sativum	179	-	CAAAT	common cis-acting element in promoter and enhancer regions
224	G10467	CAAT-box	Nicotiana glutinosa	62	+	CAAT
224	G10467	CCAAT-box	Arabidopsis thaliana	280	-	CCAAT	common cis-acting element in promoter and enhancer regions
224	G10467	CAAT-box	Nicotiana glutinosa	526	-	CAAT
224	G10467	CARE	Oryza sativa	793	-	CAACTCCC
224	G10467	CCAAT-box	Hordeum vulgare	964	-	CAACGG	MYBHv1 binding site
224	G10467	CCAAT-box	Hordeum vulgare	347	+	CAACGG	MYBHv1 binding site
224	G10467	CGTCA-motif	Hordeum vulgare	823	-	CGTCA	cis-acting regulatory element involved in the MeJA-responsiveness
224	G10467	CGTCA-motif	Hordeum vulgare	106	+	CGTCA	cis-acting regulatory element involved in the MeJA-responsiveness
224	G10467	CGTCA-motif	Hordeum vulgare	655	+	CGTCA	cis-acting regulatory element involved in the MeJA-responsiveness
224	G10467	G-box	Zea mays	727	+	CACGAC	cis-acting regulatory element involved in light responsiveness
224	G10467	G-box	Zea mays	836	-	CACGTC	cis-acting regulatory element involved in light responsiveness
224	G10467	GC-motif	Zea mays	595	-	CCCCCG	enhancer-like element involved in anoxic specific inducibility
224	G10467	GC-motif	Zea mays	790	-	CCCCCG	enhancer-like element involved in anoxic specific inducibility
224	G10467	MYB	Arabidopsis thaliana	672	+	CAACCA
224	G10467	MYB recognition site	Arabidopsis thaliana	347	-	CCGTTG
224	G10467	MYB recognition site	Arabidopsis thaliana	964	+	CCGTTG
224	G10467	STRE	Arabidopsis thaliana	492	+	AGGGG
224	G10467	STRE	Arabidopsis thaliana	374	-	AGGGG
224	G10467	STRE	Arabidopsis thaliana	382	+	AGGGG
224	G10467	Sp1	Oryza sativa	273	-	GGGCGG	light responsive element
224	G10467	Sp1	Oryza sativa	787	+	GGGCGG	light responsive element
224	G10467	TGA-element	Brassica oleracea	976	-	AACGAC	auxin-responsive element
224	G10467	TGACG-motif	Hordeum vulgare	106	-	TGACG	cis-acting regulatory element involved in the MeJA-responsiveness
224	G10467	TGACG-motif	Hordeum vulgare	655	-	TGACG	cis-acting regulatory element involved in the MeJA-responsiveness
224	G10467	TGACG-motif	Hordeum vulgare	823	+	TGACG	cis-acting regulatory element involved in the MeJA-responsiveness
224	G10467	Unnamed__1	Zea mays	628	+	CGTGG
224	G10467	Unnamed__1	Zea mays	23	-	CGTGG
224	G10467	Unnamed__1	Zea mays	324	+	CGTGG
224	G10467	Unnamed__4	Petroselinum hortense	794	-	CTCC
224	G10467	Unnamed__4	Petroselinum hortense	21	+	CTCC
224	G10467	Unnamed__4	Petroselinum hortense	609	-	CTCC
224	G10467	Unnamed__4	Petroselinum hortense	857	+	CTCC
224	G10467	Unnamed__4	Petroselinum hortense	158	+	CTCC
224	G10467	Unnamed__4	Petroselinum hortense	631	-	CTCC
224	G10467	Unnamed__4	Petroselinum hortense	622	-	CTCC
224	G10467	Unnamed__4	Petroselinum hortense	418	+	CTCC
224	G10467	Unnamed__4	Petroselinum hortense	518	+	CTCC
224	G10467	as-1	Arabidopsis thaliana	655	-	TGACG
224	G10467	as-1	Arabidopsis thaliana	106	-	TGACG
224	G10467	as-1	Arabidopsis thaliana	823	+	TGACG
224	G10686	ABRE	Arabidopsis thaliana	135	+	ACGTG	cis-acting element involved in the abscisic acid responsiveness
224	G10686	ABRE	Arabidopsis thaliana	150	+	ACGTG	cis-acting element involved in the abscisic acid responsiveness
224	G10686	Box 4	Petroselinum crispum	116	+	ATTAAT	part of a conserved DNA module involved in light responsiveness
224	G10686	CAAT-box	Nicotiana glutinosa	219	-	CAAT
224	G10686	CAAT-box	Pisum sativum	216	+	CAAAT	common cis-acting element in promoter and enhancer regions
224	G10686	CAAT-box	Nicotiana glutinosa	177	-	CAAT
224	G10686	CAAT-box	Petunia hybrida	221	+	TGCCAAC	common cis-acting element in promoter and enhancer regions
224	G10686	CAAT-box	Nicotiana glutinosa	170	-	CAAT
224	G10686	CAAT-box	Nicotiana glutinosa	453	+	CAAT
224	G10686	CCAAT-box	Arabidopsis thaliana	20	+	CCAAT	common cis-acting element in promoter and enhancer regions
224	G10686	CAAT-box	Nicotiana glutinosa	162	+	CAAT
224	G10686	CAAT-box	Nicotiana glutinosa	21	+	CAAT
224	G10686	CAAT-box	Nicotiana glutinosa	369	-	CAAT
224	G10686	CCAAT-box	Arabidopsis thaliana	120	-	CCAAT	common cis-acting element in promoter and enhancer regions
224	G10686	CAAT-box	Pisum sativum	377	+	CAAAT	common cis-acting element in promoter and enhancer regions
224	G10686	CAAT-box	Nicotiana glutinosa	434	+	CAAT
224	G10686	CAAT-box	Pisum sativum	103	+	CAAAT	common cis-acting element in promoter and enhancer regions
224	G10686	CAAT-box	Nicotiana glutinosa	49	-	CAAT
224	G10686	CAAT-box	Nicotiana glutinosa	382	+	CAAT
224	G10686	CAAT-box	Pisum sativum	294	-	CAAAT	common cis-acting element in promoter and enhancer regions
224	G10686	CAAT-box	Nicotiana glutinosa	436	-	CAAT
224	G10686	G-Box	Pisum sativum	134	-	CACGTT	cis-acting regulatory element involved in light responsiveness
224	G10686	G-Box	Pisum sativum	149	-	CACGTT	cis-acting regulatory element involved in light responsiveness
224	G10686	G-box	Brassica oleracea	192	-	TAACACGTAG	cis-acting regulatory element involved in light responsiveness
224	G10686	GATA-motif	Arabidopsis thaliana	419	-	AAGATAAGATT	part of a light responsive element
224	G10686	GCN4_motif	Oryza sativa	153	+	TGAGTCA	cis-regulatory element involved in endosperm expression
224	G10686	GT1-motif	Avena sativa	326	+	GGTTAAT	light responsive element
224	G10686	Gap-box	Arabidopsis thaliana	289	-	CAAATGAA(A/G)A	part of a light responsive element
224	G10686	MBSI	Petunia hybrida	319	+	aaaAaaC(G/C)GTTA	MYB binding site involved in flavonoid biosynthetic genes regulation
224	G10686	MRE	Petroselinum crispum	406	+	AACCTAA	MYB binding site involved in light responsiveness
224	G10686	MYB	Arabidopsis thaliana	99	+	TAACCA
224	G10686	MYB	Arabidopsis thaliana	349	+	CAACAG
224	G10686	MYB-like sequence	Arabidopsis thaliana	99	+	TAACCA
224	G10686	MYC	Arabidopsis thaliana	434	-	CAATTG
224	G10686	MYC	Arabidopsis thaliana	293	+	CATTTG
224	G10686	Myb-binding site	Nicotiana tabacum	349	+	CAACAG
224	G10686	TATA-box	Arabidopsis thaliana	55	+	TATA	core promoter element around -30 of transcription start
224	G10686	TATA-box	Arabidopsis thaliana	332	-	TATA	core promoter element around -30 of transcription start
224	G10686	TATA-box	Brassica oleracea	331	+	ATATAA	core promoter element around -30 of transcription start
224	G10686	TATA-box	Arabidopsis thaliana	344	-	TATA	core promoter element around -30 of transcription start
224	G10686	TCT-motif	Arabidopsis thaliana	273	-	TCTTAC	part of a light responsive element
224	G10686	Unnamed__2	Petroselinum hortense	406	+	AACCTAACCT
224	G10813	CAAT-box	Pisum sativum	225	+	CAAAT	common cis-acting element in promoter and enhancer regions
224	G10813	CAAT-box	Pisum sativum	328	-	CAAAT	common cis-acting element in promoter and enhancer regions
224	G10813	CAAT-box	Pisum sativum	125	+	CAAAT	common cis-acting element in promoter and enhancer regions
224	G10813	CAAT-box	Nicotiana glutinosa	448	-	CAAT
224	G10813	CAAT-box	Nicotiana glutinosa	128	-	CAAT
224	G10813	CAAT-box	Nicotiana glutinosa	396	+	CAAT
224	G10813	CAAT-box	Nicotiana glutinosa	284	-	CAAT
224	G10813	CGTCA-motif	Hordeum vulgare	171	-	CGTCA	cis-acting regulatory element involved in the MeJA-responsiveness
224	G10813	DRE core	Arabidopsis thaliana	22	+	GCCGAC
224	G10813	MBS	Arabidopsis thaliana	214	+	CAACTG	MYB binding site involved in drought-inducibility
224	G10813	MYC	Arabidopsis thaliana	225	-	CATTTG
224	G10813	Myb	Arabidopsis thaliana	214	+	CAACTG
224	G10813	Myc	Arabidopsis thaliana	432	-	TCTCTTA
224	G10813	TATA-box	Arabidopsis thaliana	200	+	TATA	core promoter element around -30 of transcription start
224	G10813	TATA-box	Arabidopsis thaliana	300	-	TATA	core promoter element around -30 of transcription start
224	G10813	TATA-box	Helianthus annuus	298	-	TATACA	core promoter element around -30 of transcription start
224	G10813	TATA-box	Arabidopsis thaliana	478	-	TATA	core promoter element around -30 of transcription start
224	G10813	TATA-box	Helianthus annuus	198	-	TATAAA	core promoter element around -30 of transcription start
224	G10813	TATA-box	Arabidopsis thaliana	199	-	TATAA	core promoter element around -30 of transcription start
224	G10813	TCA-element	Nicotiana tabacum	397	-	CCATCTTTTT	cis-acting element involved in salicylic acid responsiveness
224	G10813	TCT-motif	Arabidopsis thaliana	455	-	TCTTAC	part of a light responsive element
224	G10813	TGACG-motif	Hordeum vulgare	171	+	TGACG	cis-acting regulatory element involved in the MeJA-responsiveness
224	G10813	Unnamed__4	Petroselinum hortense	48	+	CTCC
224	G10813	Unnamed__4	Petroselinum hortense	386	+	CTCC
224	G10813	Unnamed__4	Petroselinum hortense	93	+	CTCC
224	G10813	Unnamed__4	Petroselinum hortense	85	+	CTCC
224	G10813	Unnamed__4	Petroselinum hortense	363	-	CTCC
224	G10813	as-1	Arabidopsis thaliana	171	+	TGACG
224	G10813	box S	Arabidopsis thaliana	441	+	AGCCACC
224	G11114	AAGAA-motif	Avena sativa	344	-	GAAAGAA
224	G11114	AAGAA-motif	Avena sativa	143	+	gGTAAAGAAA
224	G11114	Box 4	Petroselinum crispum	268	-	ATTAAT	part of a conserved DNA module involved in light responsiveness
224	G11114	Box 4	Petroselinum crispum	305	-	ATTAAT	part of a conserved DNA module involved in light responsiveness
224	G11114	Box 4	Petroselinum crispum	179	+	ATTAAT	part of a conserved DNA module involved in light responsiveness
224	G11114	CAAT-box	Nicotiana glutinosa	7	+	CAAT
224	G11114	CCAAT-box	Arabidopsis thaliana	375	+	CCAAT	common cis-acting element in promoter and enhancer regions
224	G11114	CAAT-box	Nicotiana glutinosa	190	+	CAAT
224	G11114	CAAT-box	Nicotiana glutinosa	399	+	CAAT
224	G11114	CCAAT-box	Arabidopsis thaliana	6	+	CCAAT	common cis-acting element in promoter and enhancer regions
224	G11114	CAAT-box	Nicotiana glutinosa	385	-	CAAT
224	G11114	CAAT-box	Nicotiana glutinosa	336	-	CAAT
224	G11114	CAAT-box	Nicotiana glutinosa	455	+	CAAT
224	G11114	CAAT-box	Nicotiana glutinosa	137	-	CAAT
224	G11114	CAAT-box	Nicotiana glutinosa	376	+	CAAT
224	G11114	CAAT-box	Pisum sativum	299	+	CAAAT	common cis-acting element in promoter and enhancer regions
224	G11114	CAAT-box	Pisum sativum	439	+	CAAAT	common cis-acting element in promoter and enhancer regions
224	G11114	CAAT-box	Nicotiana glutinosa	155	-	CAAT
224	G11114	CAAT-box	Nicotiana glutinosa	393	-	CAAT
224	G11114	CAAT-box	Pisum sativum	363	-	CAAAT	common cis-acting element in promoter and enhancer regions
224	G11114	CAAT-box	Nicotiana glutinosa	490	+	CAAT
224	G11114	CGTCA-motif	Hordeum vulgare	405	+	CGTCA	cis-acting regulatory element involved in the MeJA-responsiveness
224	G11114	GARE-motif	Brassica oleracea	350	-	TCTGTTG	gibberellin-responsive element
224	G11114	MYB	Arabidopsis thaliana	350	+	CAACAG
224	G11114	Myb-binding site	Nicotiana tabacum	350	+	CAACAG
224	G11114	TATA-box	Brassica napus	418	-	ATATAT	core promoter element around -30 of transcription start
224	G11114	TATA-box	Arabidopsis thaliana	419	-	TATA	core promoter element around -30 of transcription start
224	G11114	TATA-box	Arabidopsis thaliana	6	+	ccTATAAAaa	core promoter element around -30 of transcription start
224	G11114	TCCC-motif	Spinacia oleracea	315	-	TCTCCCT	part of a light responsive element
224	G11114	TGACG-motif	Hordeum vulgare	405	-	TGACG	cis-acting regulatory element involved in the MeJA-responsiveness
224	G11114	Unnamed__4	Petroselinum hortense	317	-	CTCC
224	G11114	Unnamed__4	Petroselinum hortense	465	-	CTCC
224	G11114	Unnamed__4	Petroselinum hortense	451	-	CTCC
224	G11114	W box	Arabidopsis thaliana	119	-	TTGACC
224	G11114	as-1	Arabidopsis thaliana	405	-	TGACG
224	G1149	ABRE	Arabidopsis thaliana	44	-	ACGTG	cis-acting element involved in the abscisic acid responsiveness
224	G1149	ARE	Zea mays	736	+	AAACCA	cis-acting regulatory element essential for the anaerobic induction
224	G1149	ARE	Zea mays	724	+	AAACCA	cis-acting regulatory element essential for the anaerobic induction
224	G1149	AT~TATA-box	Arabidopsis thaliana	849	-	TATATA
224	G1149	AT~TATA-box	Arabidopsis thaliana	847	-	TATATA
224	G1149	Box 4	Petroselinum crispum	557	-	ATTAAT	part of a conserved DNA module involved in light responsiveness
224	G1149	Box 4	Petroselinum crispum	523	-	ATTAAT	part of a conserved DNA module involved in light responsiveness
224	G1149	CAAT-box	Nicotiana glutinosa	8	-	CAAT
224	G1149	CCAAT-box	Arabidopsis thaliana	727	+	CCAAT	common cis-acting element in promoter and enhancer regions
224	G1149	CAAT-box	Nicotiana glutinosa	371	+	CAAT
224	G1149	CCAAT-box	Arabidopsis thaliana	929	-	CCAAT	common cis-acting element in promoter and enhancer regions
224	G1149	CAAT-box	Pisum sativum	301	+	CAAAT	common cis-acting element in promoter and enhancer regions
224	G1149	CAAT-box	Nicotiana glutinosa	740	+	CAAT
224	G1149	CAAT-box	Pisum sativum	527	-	CAAAT	common cis-acting element in promoter and enhancer regions
224	G1149	CAAT-box	Nicotiana glutinosa	995	-	CAAT
224	G1149	CAAT-box	Nicotiana glutinosa	81	-	CAAT
224	G1149	CCAAT-box	Arabidopsis thaliana	739	+	CCAAT	common cis-acting element in promoter and enhancer regions
224	G1149	CAAT-box	Pisum sativum	399	+	CAAAT	common cis-acting element in promoter and enhancer regions
224	G1149	CAAT-box	Nicotiana glutinosa	947	-	CAAT
224	G1149	CAAT-box	Pisum sativum	361	+	CAAAT	common cis-acting element in promoter and enhancer regions
224	G1149	CAAT-box	Nicotiana glutinosa	642	+	CAAT
224	G1149	CAAT-box	Pisum sativum	576	-	CAAAT	common cis-acting element in promoter and enhancer regions
224	G1149	CCAAT-box	Arabidopsis thaliana	961	-	CCAAT	common cis-acting element in promoter and enhancer regions
224	G1149	CAAT-box	Nicotiana glutinosa	113	-	CAAT
224	G1149	CAAT-box	Nicotiana glutinosa	665	-	CAAT
224	G1149	CAAT-box	Pisum sativum	378	+	CAAAT	common cis-acting element in promoter and enhancer regions
224	G1149	CAAT-box	Nicotiana glutinosa	864	-	CAAT
224	G1149	CAAT-box	Nicotiana glutinosa	289	+	CAAT
224	G1149	CAAT-box	Nicotiana glutinosa	819	+	CAAT
224	G1149	CAAT-box	Pisum sativum	516	+	CAAAT	common cis-acting element in promoter and enhancer regions
224	G1149	CAAT-box	Nicotiana glutinosa	935	+	CAAT
224	G1149	CAAT-box	Pisum sativum	180	+	CAAAT	common cis-acting element in promoter and enhancer regions
224	G1149	CAAT-box	Nicotiana glutinosa	728	+	CAAT
224	G1149	CAAT-box	Nicotiana glutinosa	364	-	CAAT
224	G1149	CAAT-box	Nicotiana glutinosa	837	+	CAAT
224	G1149	CCAAT-box	Hordeum vulgare	547	+	CAACGG	MYBHv1 binding site
224	G1149	CGTCA-motif	Hordeum vulgare	22	+	CGTCA	cis-acting regulatory element involved in the MeJA-responsiveness
224	G1149	ERE	Nicotiana glutinos	350	-	ATTTTAAA
224	G1149	ERE	Nicotiana glutinos	839	+	ATTTTAAA
224	G1149	G-Box	Pisum sativum	44	+	CACGTT	cis-acting regulatory element involved in light responsiveness
224	G1149	G-box	Zea mays	242	-	CACGAC	cis-acting regulatory element involved in light responsiveness
224	G1149	GT1-motif	Avena sativa	203	+	GGTTAAT	light responsive element
224	G1149	MBS	Arabidopsis thaliana	974	-	CAACTG	MYB binding site involved in drought-inducibility
224	G1149	MBS	Arabidopsis thaliana	502	+	CAACTG	MYB binding site involved in drought-inducibility
224	G1149	MYB recognition site	Arabidopsis thaliana	547	-	CCGTTG
224	G1149	Myb	Arabidopsis thaliana	502	+	CAACTG
224	G1149	Myb	Arabidopsis thaliana	974	-	CAACTG
224	G1149	TATA	Arabidopsis thaliana	319	-	TATAAAAT
224	G1149	TATA-box	Brassica juncea	491	-	TATAAAT	core promoter element around -30 of transcription start
224	G1149	TATA-box	Arabidopsis thaliana	494	+	TATA	core promoter element around -30 of transcription start
224	G1149	TATA-box	Arabidopsis thaliana	323	+	TATA	core promoter element around -30 of transcription start
224	G1149	TATA-box	Brassica napus	846	-	ATATAT	core promoter element around -30 of transcription start
224	G1149	TATA-box	Arabidopsis thaliana	228	+	TATA	core promoter element around -30 of transcription start
224	G1149	TATA-box	Arabidopsis thaliana	798	-	TATA	core promoter element around -30 of transcription start
224	G1149	TATA-box	Arabidopsis thaliana	169	+	TATA	core promoter element around -30 of transcription start
224	G1149	TATA-box	Brassica oleracea	850	+	ATATAA	core promoter element around -30 of transcription start
224	G1149	TATA-box	Arabidopsis thaliana	493	-	TATAA	core promoter element around -30 of transcription start
224	G1149	TATA-box	Arabidopsis thaliana	750	-	TATA	core promoter element around -30 of transcription start
224	G1149	TATA-box	Arabidopsis thaliana	102	+	TATA	core promoter element around -30 of transcription start
224	G1149	TATA-box	Brassica napus	848	-	ATATAT	core promoter element around -30 of transcription start
224	G1149	TATA-box	Arabidopsis thaliana	146	+	TATA	core promoter element around -30 of transcription start
224	G1149	TATA-box	Pisum sativum	795	-	TATAAAA	core promoter element around -30 of transcription start
224	G1149	TATA-box	Helianthus annuus	321	-	TATAAA	core promoter element around -30 of transcription start
224	G1149	TATA-box	Arabidopsis thaliana	851	-	TATA	core promoter element around -30 of transcription start
224	G1149	TATA-box	Arabidopsis thaliana	226	+	ccTATAAAaa	core promoter element around -30 of transcription start
224	G1149	TATA-box	Arabidopsis thaliana	598	-	TATAA	core promoter element around -30 of transcription start
224	G1149	TATA-box	Arabidopsis thaliana	348	+	TATTTAAA	core promoter element around -30 of transcription start
224	G1149	TATA-box	Arabidopsis thaliana	841	-	TATTTAAA	core promoter element around -30 of transcription start
224	G1149	TATA-box	Arabidopsis thaliana	168	-	TATAA	core promoter element around -30 of transcription start
224	G1149	TATA-box	Helianthus annuus	796	-	TATAAA	core promoter element around -30 of transcription start
224	G1149	TATA-box	Brassica napus	101	+	ATATAT	core promoter element around -30 of transcription start
224	G1149	TATA-box	Arabidopsis thaliana	849	-	TATATA	core promoter element around -30 of transcription start
224	G1149	TATA-box	Oryza sativa	456	-	TACAAAA	core promoter element around -30 of transcription start
224	G1149	TATA-box	Arabidopsis thaliana	599	-	TATA	core promoter element around -30 of transcription start
224	G1149	TATA-box	Arabidopsis thaliana	93	-	TATTTAAA	core promoter element around -30 of transcription start
224	G1149	TATA-box	Arabidopsis thaliana	847	-	TATATA	core promoter element around -30 of transcription start
224	G1149	TATA-box	Arabidopsis thaliana	322	-	TATAA	core promoter element around -30 of transcription start
224	G1149	TATA-box	Arabidopsis thaliana	797	-	TATAA	core promoter element around -30 of transcription start
224	G1149	TATA-box	Pisum sativum	320	-	TATAAAA	core promoter element around -30 of transcription start
224	G1149	TATA-box	Pisum sativum	596	-	TATAAAA	core promoter element around -30 of transcription start
224	G1149	TATA-box	Arabidopsis thaliana	89	-	TAAAGATT	core promoter element around -30 of transcription start
224	G1149	TATA-box	Helianthus annuus	597	-	TATAAA	core promoter element around -30 of transcription start
224	G1149	TATA-box	Helianthus annuus	492	-	TATAAA	core promoter element around -30 of transcription start
224	G1149	TCT-motif	Arabidopsis thaliana	671	-	TCTTAC	part of a light responsive element
224	G1149	TGACG-motif	Hordeum vulgare	22	-	TGACG	cis-acting regulatory element involved in the MeJA-responsiveness
224	G1149	Unnamed__4	Petroselinum hortense	157	+	CTCC
224	G1149	Unnamed__4	Petroselinum hortense	513	+	CTCC
224	G1149	Unnamed__4	Petroselinum hortense	200	-	CTCC
224	G1149	W box	Arabidopsis thaliana	932	-	TTGACC
224	G1149	WUN-motif	Nicotiana glutinosa	714	-	AAATTTCTT
224	G1149	as-1	Arabidopsis thaliana	22	-	TGACG
224	G12174	AE-box	Arabidopsis thaliana	375	-	AGAAACAA	part of a module for light response
224	G12174	AT~TATA-box	Arabidopsis thaliana	89	+	TATATA
224	G12174	AT~TATA-box	Arabidopsis thaliana	295	-	TATATA
224	G12174	Box 4	Petroselinum crispum	123	+	ATTAAT	part of a conserved DNA module involved in light responsiveness
224	G12174	CAAT-box	Nicotiana glutinosa	392	-	CAAT
224	G12174	CAAT-box	Nicotiana glutinosa	423	-	CAAT
224	G12174	CAAT-box	Nicotiana glutinosa	251	-	CAAT
224	G12174	CAAT-box	Pisum sativum	336	+	CAAAT	common cis-acting element in promoter and enhancer regions
224	G12174	CAAT-box	Nicotiana glutinosa	284	+	CAAT
224	G12174	CAAT-box	Nicotiana glutinosa	367	+	CAAT
224	G12174	TATA-box	Arabidopsis thaliana	111	+	TATA	core promoter element around -30 of transcription start
224	G12174	TATA-box	Arabidopsis thaliana	324	-	TATA	core promoter element around -30 of transcription start
224	G12174	TATA-box	Arabidopsis thaliana	294	-	TATATAA	core promoter element around -30 of transcription start
224	G12174	TATA-box	Arabidopsis thaliana	91	+	TATA	core promoter element around -30 of transcription start
224	G12174	TATA-box	Arabidopsis thaliana	295	-	TATATA	core promoter element around -30 of transcription start
224	G12174	TATA-box	Helianthus annuus	116	-	TATAAA	core promoter element around -30 of transcription start
224	G12174	TATA-box	Arabidopsis thaliana	118	+	TATA	core promoter element around -30 of transcription start
224	G12174	TATA-box	Arabidopsis thaliana	117	-	TATAA	core promoter element around -30 of transcription start
224	G12174	TATA-box	Brassica juncea	115	-	TATAAAT	core promoter element around -30 of transcription start
224	G12174	TATA-box	Brassica napus	296	-	ATATAT	core promoter element around -30 of transcription start
224	G12174	TATA-box	Arabidopsis thaliana	323	-	TATAA	core promoter element around -30 of transcription start
224	G12174	TATA-box	Arabidopsis thaliana	316	-	TATA	core promoter element around -30 of transcription start
224	G12174	TATA-box	Arabidopsis thaliana	297	-	TATA	core promoter element around -30 of transcription start
224	G12174	TATA-box	Helianthus annuus	66	-	TATAAA	core promoter element around -30 of transcription start
224	G12174	TATA-box	Arabidopsis thaliana	55	+	ccTATAAAaa	core promoter element around -30 of transcription start
224	G12174	TATA-box	Arabidopsis thaliana	57	+	TATA	core promoter element around -30 of transcription start
224	G12174	TATA-box	Arabidopsis thaliana	89	+	TATATA	core promoter element around -30 of transcription start
224	G12174	TATA-box	Arabidopsis thaliana	67	-	TATAA	core promoter element around -30 of transcription start
224	G12174	TATA-box	Arabidopsis thaliana	68	+	TATA	core promoter element around -30 of transcription start
224	G12174	TATA-box	Brassica oleracea	56	+	ATATAA	core promoter element around -30 of transcription start
224	G12174	TATA-box	Brassica napus	87	+	ATTATA	core promoter element around -30 of transcription start
224	G12174	TATA-box	Brassica juncea	65	-	TATAAAT	core promoter element around -30 of transcription start
224	G12174	TATA-box	Arabidopsis thaliana	88	-	TATATAA	core promoter element around -30 of transcription start
224	G12174	Unnamed__4	Petroselinum hortense	46	-	CTCC
224	G12174	circadian	Lycopersicon esculentum	80	+	CAAAGATATC	cis-acting regulatory element involved in circadian control
224	G12174	circadian	Lycopersicon esculentum	216	-	CAAAGATATC	cis-acting regulatory element involved in circadian control
224	G12465	ABRE	Arabidopsis thaliana	945	-	ACGTG	cis-acting element involved in the abscisic acid responsiveness
224	G12465	ACE	Petroselinum crispum	516	-	CTAACGTATT	cis-acting element involved in light responsiveness
224	G12465	ARE	Zea mays	556	+	AAACCA	cis-acting regulatory element essential for the anaerobic induction
224	G12465	AT~TATA-box	Arabidopsis thaliana	391	+	TATATA
224	G12465	AT~TATA-box	Arabidopsis thaliana	205	+	TATATA
224	G12465	Box 4	Petroselinum crispum	315	+	ATTAAT	part of a conserved DNA module involved in light responsiveness
224	G12465	CAAT-box	Pisum sativum	738	-	CAAAT	common cis-acting element in promoter and enhancer regions
224	G12465	CAAT-box	Nicotiana glutinosa	161	-	CAAT
224	G12465	CAAT-box	Nicotiana glutinosa	319	-	CAAT
224	G12465	CAAT-box	Pisum sativum	813	-	CAAAT	common cis-acting element in promoter and enhancer regions
224	G12465	CAAT-box	Nicotiana glutinosa	284	+	CAAT
224	G12465	CAAT-box	Nicotiana glutinosa	593	-	CAAT
224	G12465	CAAT-box	Nicotiana glutinosa	515	+	CAAT
224	G12465	CCAAT-box	Arabidopsis thaliana	873	-	CCAAT	common cis-acting element in promoter and enhancer regions
224	G12465	CAAT-box	Nicotiana glutinosa	55	-	CAAT
224	G12465	CAAT-box	Pisum sativum	639	+	CAAAT	common cis-acting element in promoter and enhancer regions
224	G12465	CAAT-box	Pisum sativum	386	-	CAAAT	common cis-acting element in promoter and enhancer regions
224	G12465	CAAT-box	Nicotiana glutinosa	871	+	CAAT
224	G12465	CCAAT-box	Arabidopsis thaliana	283	+	CCAAT	common cis-acting element in promoter and enhancer regions
224	G12465	CAAT-box	Nicotiana glutinosa	765	-	CAAT
224	G12465	CCAAT-box	Arabidopsis thaliana	458	-	CCAAT	common cis-acting element in promoter and enhancer regions
224	G12465	CAAT-box	Nicotiana glutinosa	531	+	CAAT
224	G12465	CAAT-box	Nicotiana glutinosa	76	+	CAAT
224	G12465	CAAT-box	Nicotiana glutinosa	669	+	CAAT
224	G12465	CAAT-box	Nicotiana glutinosa	235	-	CAAT
224	G12465	ERE	Nicotiana glutinos	79	-	ATTTTAAA
224	G12465	ERE	Nicotiana glutinos	971	+	ATTTTAAA
224	G12465	G-Box	Pisum sativum	945	+	CACGTT	cis-acting regulatory element involved in light responsiveness
224	G12465	MRE	Petroselinum crispum	352	-	AACCTAA	MYB binding site involved in light responsiveness
224	G12465	MYC	Arabidopsis thaliana	405	+	CATGTG
224	G12465	MYC	Arabidopsis thaliana	737	+	CATTTG
224	G12465	MYC	Arabidopsis thaliana	639	-	CATTTG
224	G12465	MYC	Arabidopsis thaliana	871	-	CAATTG
224	G12465	Myb	Arabidopsis thaliana	490	+	TAACTG
224	G12465	TATA-box	Pisum sativum	583	-	TATAAAA	core promoter element around -30 of transcription start
224	G12465	TATA-box	Brassica napus	107	+	ATTATA	core promoter element around -30 of transcription start
224	G12465	TATA-box	Brassica napus	289	+	ATATAT	core promoter element around -30 of transcription start
224	G12465	TATA-box	Arabidopsis thaliana	586	-	TATA	core promoter element around -30 of transcription start
224	G12465	TATA-box	Helianthus annuus	118	-	TATAAA	core promoter element around -30 of transcription start
224	G12465	TATA-box	Arabidopsis thaliana	391	+	TATATA	core promoter element around -30 of transcription start
224	G12465	TATA-box	Brassica oleracea	369	+	ATATAA	core promoter element around -30 of transcription start
224	G12465	TATA-box	Helianthus annuus	854	-	TATAAA	core promoter element around -30 of transcription start
224	G12465	TATA-box	Arabidopsis thaliana	116	-	taTATAAAtc	core promoter element around -30 of transcription start
224	G12465	TATA-box	Helianthus annuus	575	-	TATAAA	core promoter element around -30 of transcription start
224	G12465	TATA-box	Arabidopsis thaliana	358	+	TATA	core promoter element around -30 of transcription start
224	G12465	TATA-box	Arabidopsis thaliana	761	-	TATAA	core promoter element around -30 of transcription start
224	G12465	TATA-box	Arabidopsis thaliana	204	-	TATATAA	core promoter element around -30 of transcription start
224	G12465	TATA-box	Helianthus annuus	584	-	TATAAA	core promoter element around -30 of transcription start
224	G12465	TATA-box	Arabidopsis thaliana	370	+	TATA	core promoter element around -30 of transcription start
224	G12465	TATA-box	Arabidopsis thaliana	856	-	TATA	core promoter element around -30 of transcription start
224	G12465	TATA-box	Arabidopsis thaliana	108	-	TATAA	core promoter element around -30 of transcription start
224	G12465	TATA-box	Arabidopsis thaliana	545	-	TATA	core promoter element around -30 of transcription start
224	G12465	TATA-box	Arabidopsis thaliana	290	+	TATA	core promoter element around -30 of transcription start
224	G12465	TATA-box	Arabidopsis thaliana	700	-	TATAA	core promoter element around -30 of transcription start
224	G12465	TATA-box	Arabidopsis thaliana	120	+	TATA	core promoter element around -30 of transcription start
224	G12465	TATA-box	Arabidopsis thaliana	577	-	TATA	core promoter element around -30 of transcription start
224	G12465	TATA-box	Arabidopsis thaliana	365	+	TATA	core promoter element around -30 of transcription start
224	G12465	TATA-box	Arabidopsis thaliana	855	-	TATAA	core promoter element around -30 of transcription start
224	G12465	TATA-box	Brassica juncea	117	-	TATAAAT	core promoter element around -30 of transcription start
224	G12465	TATA-box	Arabidopsis thaliana	576	-	TATAA	core promoter element around -30 of transcription start
224	G12465	TATA-box	Arabidopsis thaliana	364	-	TATAA	core promoter element around -30 of transcription start
224	G12465	TATA-box	Arabidopsis thaliana	762	-	TATA	core promoter element around -30 of transcription start
224	G12465	TATA-box	Arabidopsis thaliana	205	+	TATATA	core promoter element around -30 of transcription start
224	G12465	TATA-box	Arabidopsis thaliana	585	-	TATAA	core promoter element around -30 of transcription start
224	G12465	TATA-box	Helianthus annuus	389	-	TATACA	core promoter element around -30 of transcription start
224	G12465	TATA-box	Helianthus annuus	699	-	TATAAA	core promoter element around -30 of transcription start
224	G12465	TATA-box	Arabidopsis thaliana	26	+	TATA	core promoter element around -30 of transcription start
224	G12465	TATA-box	Arabidopsis thaliana	393	+	TATA	core promoter element around -30 of transcription start
224	G12465	TATA-box	Arabidopsis thaliana	207	+	TATA	core promoter element around -30 of transcription start
224	G12465	TATA-box	Arabidopsis thaliana	701	-	TATA	core promoter element around -30 of transcription start
224	G12465	TATA-box	Arabidopsis thaliana	119	-	TATAA	core promoter element around -30 of transcription start
224	G12465	TATA-box	Pisum sativum	574	-	TATAAAA	core promoter element around -30 of transcription start
224	G12465	TATA-box	Arabidopsis thaliana	357	-	TATAA	core promoter element around -30 of transcription start
224	G12465	TATA-box	Arabidopsis thaliana	109	+	TATA	core promoter element around -30 of transcription start
224	G12465	TATA-box	Brassica napus	203	+	ATTATA	core promoter element around -30 of transcription start
224	G12465	TGA-element	Brassica oleracea	611	-	AACGAC	auxin-responsive element
224	G12465	Unnamed__4	Petroselinum hortense	965	-	CTCC
224	G12465	Unnamed__4	Petroselinum hortense	622	-	CTCC
224	G12465	Unnamed__6	Zea mays	382	-	taTAAATATct
224	G12465	WUN-motif	Nicotiana glutinosa	984	+	AAATTTCTT
224	G12465	chs-CMA1a	Daucus carota	481	-	TTACTTAA	part of a light responsive element
224	G12598	ABRE	Arabidopsis thaliana	444	-	ACGTG	cis-acting element involved in the abscisic acid responsiveness
224	G12598	CCAAT-box	Arabidopsis thaliana	475	-	CCAAT	common cis-acting element in promoter and enhancer regions
224	G12598	CCAAT-box	Arabidopsis thaliana	405	-	CCAAT	common cis-acting element in promoter and enhancer regions
224	G12598	CAAT-box	Pisum sativum	316	-	CAAAT	common cis-acting element in promoter and enhancer regions
224	G12598	CCAAT-box	Arabidopsis thaliana	182	-	CCAAT	common cis-acting element in promoter and enhancer regions
224	G12598	CAAT-box	Nicotiana glutinosa	180	+	CAAT
224	G12598	CAAT-box	Nicotiana glutinosa	295	-	CAAT
224	G12598	CAAT-box	Pisum sativum	214	-	CAAAT	common cis-acting element in promoter and enhancer regions
224	G12598	CGTCA-motif	Hordeum vulgare	446	+	CGTCA	cis-acting regulatory element involved in the MeJA-responsiveness
224	G12598	G-box	Zea mays	444	+	CACGTC	cis-acting regulatory element involved in light responsiveness
224	G12598	GATA-motif	Pisum sativum	366	+	GATAGGG	part of a light responsive element
224	G12598	I-box	Flaveria trinervia	475	-	cCATATCCAAT	part of a light responsive element
224	G12598	I-box	Zea mays	478	+	gGATAAGGTG	part of a light responsive element
224	G12598	LAMP-element	Spinacia oleracea	477	-	CCTTATCCA	part of a light responsive element
224	G12598	MYB	Arabidopsis thaliana	217	-	CAACCA
224	G12598	MYB	Arabidopsis thaliana	184	-	CAACCA
224	G12598	MYC	Arabidopsis thaliana	315	+	CATTTG
224	G12598	MYC	Arabidopsis thaliana	180	+	CAATTG
224	G12598	STRE	Arabidopsis thaliana	330	+	AGGGG
224	G12598	TCA	Pisum sativum	4	+	TCATCTTCAT
224	G12598	TGACG-motif	Hordeum vulgare	446	-	TGACG	cis-acting regulatory element involved in the MeJA-responsiveness
224	G12598	Unnamed__1	Zea mays	443	-	CGTGG
224	G12598	Unnamed__4	Petroselinum hortense	256	-	CTCC
224	G12598	Unnamed__4	Petroselinum hortense	126	-	CTCC
224	G12598	Unnamed__4	Petroselinum hortense	386	+	CTCC
224	G12598	Unnamed__4	Petroselinum hortense	196	-	CTCC
224	G12598	Unnamed__4	Petroselinum hortense	110	-	CTCC
224	G12598	Unnamed__4	Petroselinum hortense	97	-	CTCC
224	G12598	Unnamed__4	Petroselinum hortense	72	-	CTCC
224	G12598	as-1	Arabidopsis thaliana	446	-	TGACG
224	G12648	3-AF1 binding site	Solanum tuberosum	210	-	TAAGAGAGGAA	light responsive element
224	G12648	AAGAA-motif	Avena sativa	248	-	GAAAGAA
224	G12648	AT~TATA-box	Arabidopsis thaliana	232	-	TATATAAA
224	G12648	AT~TATA-box	Arabidopsis thaliana	234	+	TATATA
224	G12648	CAAT-box	Nicotiana glutinosa	381	+	CAAT
224	G12648	CAAT-box	Nicotiana glutinosa	192	+	CAAT
224	G12648	CAAT-box	Pisum sativum	275	-	CAAAT	common cis-acting element in promoter and enhancer regions
224	G12648	CAAT-box	Nicotiana glutinosa	375	+	CAAT
224	G12648	CAAT-box	Nicotiana glutinosa	339	+	CAAT
224	G12648	CAAT-box	Nicotiana glutinosa	41	+	CAAT
224	G12648	CAAT-box	Nicotiana glutinosa	9	+	CAAT
224	G12648	CAAT-box	Nicotiana glutinosa	302	-	CAAT
224	G12648	CAAT-box	Nicotiana glutinosa	201	-	CAAT
224	G12648	CCAAT-box	Hordeum vulgare	400	+	CAACGG	MYBHv1 binding site
224	G12648	G-box	Zea mays	494	-	CACGAC	cis-acting regulatory element involved in light responsiveness
224	G12648	G-box	Zea mays	488	-	CACGAC	cis-acting regulatory element involved in light responsiveness
224	G12648	G-box	Zea mays	464	-	CACGAC	cis-acting regulatory element involved in light responsiveness
224	G12648	GCN4_motif	Oryza sativa	61	-	TGAGTCA	cis-regulatory element involved in endosperm expression
224	G12648	GT1-motif	Arabidopsis thaliana	443	-	GGTTAA	light responsive element
224	G12648	MBS	Arabidopsis thaliana	13	+	CAACTG	MYB binding site involved in drought-inducibility
224	G12648	MYB	Arabidopsis thaliana	66	+	CAACCA
224	G12648	MYB recognition site	Arabidopsis thaliana	400	-	CCGTTG
224	G12648	MYC	Arabidopsis thaliana	274	+	CATTTG
224	G12648	Myb	Arabidopsis thaliana	13	+	CAACTG
224	G12648	NON	Nicotiana tabacum	478	-	CAACGGCCACG
224	G12648	NON	Nicotiana tabacum	466	-	CAACGGCCACG
224	G12648	NON	Nicotiana tabacum	472	-	CAACGGCCACG
224	G12648	P-box	Oryza sativa	347	+	CCTTTTG	gibberellin-responsive element
224	G12648	TATA-box	Arabidopsis thaliana	92	+	TATA	core promoter element around -30 of transcription start
224	G12648	TATA-box	Arabidopsis thaliana	308	-	TATA	core promoter element around -30 of transcription start
224	G12648	TATA-box	Lycopersicon esculentum	231	-	taTATAAAg	core promoter element around -30 of transcription start
224	G12648	TATA-box	Arabidopsis thaliana	91	-	TATAA	core promoter element around -30 of transcription start
224	G12648	TATA-box	Arabidopsis thaliana	140	+	TATA	core promoter element around -30 of transcription start
224	G12648	TATA-box	Helianthus annuus	90	-	TATAAA	core promoter element around -30 of transcription start
224	G12648	TATA-box	Arabidopsis thaliana	307	-	TATAA	core promoter element around -30 of transcription start
224	G12648	TATA-box	Arabidopsis thaliana	236	+	TATA	core promoter element around -30 of transcription start
224	G12648	TATA-box	Brassica juncea	89	-	TATAAAT	core promoter element around -30 of transcription start
224	G12648	TATA-box	Arabidopsis thaliana	234	+	TATATA	core promoter element around -30 of transcription start
224	G12648	TATA-box	Helianthus annuus	232	-	TATAAA	core promoter element around -30 of transcription start
224	G12648	TATA-box	Arabidopsis thaliana	233	-	TATATAA	core promoter element around -30 of transcription start
224	G12648	Unnamed__1	Zea mays	490	+	CGTGG
224	G12648	Unnamed__1	Zea mays	478	+	CGTGG
224	G12648	Unnamed__1	Zea mays	484	+	CGTGG
224	G12648	Unnamed__1	Zea mays	466	+	CGTGG
224	G12648	Unnamed__1	Zea mays	472	+	CGTGG
224	G12648	Unnamed__4	Petroselinum hortense	416	-	CTCC
224	G12648	Unnamed__4	Petroselinum hortense	385	-	CTCC
224	G12648	Unnamed__4	Petroselinum hortense	153	+	CTCC
224	G12648	W box	Arabidopsis thaliana	451	-	TTGACC
224	G13243	AAGAA-motif	Avena sativa	734	+	GAAAGAA
224	G13243	AAGAA-motif	Avena sativa	237	-	GAAAGAA
224	G13243	ACA-motif	Arabidopsis thaliana	166	+	AATCACAACCATA	part of gapA in (gapA-CMA1) involved with light responsiveness
224	G13243	AE-box	Arabidopsis thaliana	897	-	AGAAACAA	part of a module for light response
224	G13243	AT~TATA-box	Arabidopsis thaliana	857	-	TATATA
224	G13243	AT~TATA-box	Arabidopsis thaliana	96	-	TATATAAA
224	G13243	AT~TATA-box	Arabidopsis thaliana	603	-	TATATA
224	G13243	AT~TATA-box	Arabidopsis thaliana	766	-	TATATA
224	G13243	AT~TATA-box	Arabidopsis thaliana	98	+	TATATA
224	G13243	Box 4	Petroselinum crispum	792	-	ATTAAT	part of a conserved DNA module involved in light responsiveness
224	G13243	Box 4	Petroselinum crispum	456	+	ATTAAT	part of a conserved DNA module involved in light responsiveness
224	G13243	CAAT-box	Pisum sativum	392	+	CAAAT	common cis-acting element in promoter and enhancer regions
224	G13243	CAAT-box	Nicotiana glutinosa	342	-	CAAT
224	G13243	CAAT-box	Pisum sativum	540	+	CAAAT	common cis-acting element in promoter and enhancer regions
224	G13243	CAAT-box	Nicotiana glutinosa	835	-	CAAT
224	G13243	CAAT-box	Pisum sativum	572	+	CAAAT	common cis-acting element in promoter and enhancer regions
224	G13243	CAAT-box	Nicotiana glutinosa	896	-	CAAT
224	G13243	CAAT-box	Nicotiana glutinosa	359	-	CAAT
224	G13243	CAAT-box	Nicotiana glutinosa	87	-	CAAT
224	G13243	CAAT-box	Nicotiana glutinosa	441	-	CAAT
224	G13243	CAAT-box	Pisum sativum	761	+	CAAAT	common cis-acting element in promoter and enhancer regions
224	G13243	CAAT-box	Nicotiana glutinosa	70	+	CAAT
224	G13243	CAAT-box	Pisum sativum	796	-	CAAAT	common cis-acting element in promoter and enhancer regions
224	G13243	CAAT-box	Nicotiana glutinosa	608	-	CAAT
224	G13243	CAAT-box	Nicotiana glutinosa	878	-	CAAT
224	G13243	CAAT-box	Pisum sativum	743	+	CAAAT	common cis-acting element in promoter and enhancer regions
224	G13243	CAAT-box	Nicotiana glutinosa	716	+	CAAT
224	G13243	CAAT-box	Nicotiana glutinosa	430	-	CAAT
224	G13243	CAAT-box	Pisum sativum	19	+	CAAAT	common cis-acting element in promoter and enhancer regions
224	G13243	CAAT-box	Pisum sativum	80	-	CAAAT	common cis-acting element in promoter and enhancer regions
224	G13243	CAAT-box	Pisum sativum	664	+	CAAAT	common cis-acting element in promoter and enhancer regions
224	G13243	CAAT-box	Nicotiana glutinosa	711	-	CAAT
224	G13243	CAG-motif	Arabidopsis thaliana	958	-	GAAAGGCAGAC	part of a light response element
224	G13243	ERE	Nicotiana glutinos	684	-	ATTTTAAA
224	G13243	ERE	Nicotiana glutinos	617	+	ATTTTAAA
224	G13243	ERE	Nicotiana glutinos	188	+	ATTTTAAA
224	G13243	ERE	Nicotiana glutinos	619	-	ATTTTAAA
224	G13243	GATA-motif	Arabidopsis thaliana	465	+	GATAGGA	part of a light responsive element
224	G13243	MYB	Arabidopsis thaliana	171	+	TAACCA
224	G13243	MYB-like sequence	Arabidopsis thaliana	171	+	TAACCA
224	G13243	MYC	Arabidopsis thaliana	540	-	CATTTG
224	G13243	MYC	Arabidopsis thaliana	79	+	CATTTG
224	G13243	O2-site	Zea mays	7	-	GATGATGTGG	cis-acting regulatory element involved in zein metabolism regulation
224	G13243	TATA	Arabidopsis thaliana	94	-	TATAAAAT
224	G13243	TATA-box	Brassica napus	858	-	ATATAT	core promoter element around -30 of transcription start
224	G13243	TATA-box	Arabidopsis thaliana	461	-	ccTATAAAaa	core promoter element around -30 of transcription start
224	G13243	TATA-box	Oryza sativa	691	-	TACAAAA	core promoter element around -30 of transcription start
224	G13243	TATA-box	Oryza sativa	668	-	TACAAAA	core promoter element around -30 of transcription start
224	G13243	TATA-box	Arabidopsis thaliana	904	-	TATTTAAA	core promoter element around -30 of transcription start
224	G13243	TATA-box	Brassica oleracea	746	+	ATATAA	core promoter element around -30 of transcription start
224	G13243	TATA-box	Arabidopsis thaliana	605	-	TATA	core promoter element around -30 of transcription start
224	G13243	TATA-box	Arabidopsis thaliana	768	-	TATA	core promoter element around -30 of transcription start
224	G13243	TATA-box	Brassica oleracea	767	+	ATATAA	core promoter element around -30 of transcription start
224	G13243	TATA-box	Arabidopsis thaliana	766	-	TATATA	core promoter element around -30 of transcription start
224	G13243	TATA-box	Brassica oleracea	120	+	ATATAA	core promoter element around -30 of transcription start
224	G13243	TATA-box	Arabidopsis thaliana	104	-	TATAA	core promoter element around -30 of transcription start
224	G13243	TATA-box	Arabidopsis thaliana	98	+	TATATA	core promoter element around -30 of transcription start
224	G13243	TATA-box	Pisum sativum	95	-	TATAAAA	core promoter element around -30 of transcription start
224	G13243	TATA-box	Brassica napus	764	+	ATTATA	core promoter element around -30 of transcription start
224	G13243	TATA-box	Arabidopsis thaliana	765	-	TATATAA	core promoter element around -30 of transcription start
224	G13243	TATA-box	Brassica oleracea	482	+	ATATAA	core promoter element around -30 of transcription start
224	G13243	TATA-box	Arabidopsis thaliana	105	+	TATA	core promoter element around -30 of transcription start
224	G13243	TATA-box	Avena sativa	859	+	TATATTTATATTT	core promoter element around -30 of transcription start
224	G13243	TATA-box	Arabidopsis thaliana	121	+	TATA	core promoter element around -30 of transcription start
224	G13243	TATA-box	Brassica oleracea	625	+	ATATAA	core promoter element around -30 of transcription start
224	G13243	TATA-box	Arabidopsis thaliana	483	+	TATA	core promoter element around -30 of transcription start
224	G13243	TATA-box	Arabidopsis thaliana	319	+	taTATAAAtc	core promoter element around -30 of transcription start
224	G13243	TATA-box	Arabidopsis thaliana	857	-	TATATA	core promoter element around -30 of transcription start
224	G13243	TATA-box	Brassica napus	99	+	ATATAT	core promoter element around -30 of transcription start
224	G13243	TATA-box	Brassica napus	604	-	ATATAT	core promoter element around -30 of transcription start
224	G13243	TATA-box	Arabidopsis thaliana	111	+	TATA	core promoter element around -30 of transcription start
224	G13243	TATA-box	Brassica napus	855	+	ATTATA	core promoter element around -30 of transcription start
224	G13243	TATA-box	Brassica napus	602	-	ATATAT	core promoter element around -30 of transcription start
224	G13243	TATA-box	Arabidopsis thaliana	603	-	TATATA	core promoter element around -30 of transcription start
224	G13243	TATA-box	Arabidopsis thaliana	747	-	TATA	core promoter element around -30 of transcription start
224	G13243	TATA-box	Arabidopsis thaliana	856	-	TATATAA	core promoter element around -30 of transcription start
224	G13243	TATA-box	Arabidopsis thaliana	382	+	TATA	core promoter element around -30 of transcription start
224	G13243	TATA-box	Arabidopsis thaliana	100	+	TATA	core promoter element around -30 of transcription start
224	G13243	TATA-box	Arabidopsis thaliana	626	-	TATA	core promoter element around -30 of transcription start
224	G13243	TATA-box	Brassica napus	103	+	ATTATA	core promoter element around -30 of transcription start
224	G13243	TATA-box	Arabidopsis thaliana	317	-	TATTTAAA	core promoter element around -30 of transcription start
224	G13243	TATA-box	Helianthus annuus	96	-	TATAAA	core promoter element around -30 of transcription start
224	G13243	TATA-box	Arabidopsis thaliana	97	-	TATATAA	core promoter element around -30 of transcription start
224	G13243	Unnamed__1	Glycine max	314	+	GAATTTAATTAA	60K protein binding site
224	G13243	Unnamed__4	Petroselinum hortense	57	+	CTCC
224	G13243	Unnamed__4	Petroselinum hortense	44	+	CTCC
224	G13243	Unnamed__4	Petroselinum hortense	784	-	CTCC
224	G13243	Unnamed__4	Petroselinum hortense	985	+	CTCC
224	G13243	Unnamed__4	Petroselinum hortense	16	+	CTCC
224	G13243	Unnamed__4	Petroselinum hortense	47	+	CTCC
224	G13243	WRE3	Pisum sativum	60	+	CCACCT
224	G13243	WUN-motif	Nicotiana glutinosa	848	+	TTATTACAT
224	G13243	WUN-motif	Nicotiana glutinosa	679	-	AAATTACT
224	G13243	WUN-motif	Nicotiana glutinosa	20	+	AAATTACTA
224	G13243	WUN-motif	Nicotiana glutinosa	678	-	AAATTACTA
224	G13243	circadian	Lycopersicon esculentum	752	+	CAAAGATATC	cis-acting regulatory element involved in circadian control
224	G14363	AAGAA-motif	Avena sativa	311	+	GAAAGAA
224	G14363	AT~TATA-box	Arabidopsis thaliana	350	-	TATATA
224	G14363	AuxRE	Glycine max	370	+	TGTCTCAATAAG	part of an auxin-responsive element
224	G14363	Box 4	Petroselinum crispum	42	+	ATTAAT	part of a conserved DNA module involved in light responsiveness
224	G14363	CAAT-box	Nicotiana glutinosa	466	-	CAAT
224	G14363	CAAT-box	Nicotiana glutinosa	458	-	CAAT
224	G14363	CAAT-box	Nicotiana glutinosa	388	+	CAAT
224	G14363	CAAT-box	Nicotiana glutinosa	269	+	CAAT
224	G14363	CAAT-box	Nicotiana glutinosa	265	+	CAAT
224	G14363	CAAT-box	Nicotiana glutinosa	78	+	CAAT
224	G14363	CAAT-box	Nicotiana glutinosa	103	+	CAAT
224	G14363	CAAT-box	Nicotiana glutinosa	158	-	CAAT
224	G14363	CAAT-box	Pisum sativum	301	+	CAAAT	common cis-acting element in promoter and enhancer regions
224	G14363	CAAT-box	Nicotiana glutinosa	122	+	CAAT
224	G14363	CAAT-box	Nicotiana glutinosa	124	-	CAAT
224	G14363	GT1-motif	Avena sativa	46	-	GGTTAAT	light responsive element
224	G14363	GT1-motif	Arabidopsis thaliana	47	-	GGTTAA	light responsive element
224	G14363	MRE	Petroselinum crispum	49	+	AACCTAA	MYB binding site involved in light responsiveness
224	G14363	MRE	Petroselinum crispum	111	-	AACCTAA	MYB binding site involved in light responsiveness
224	G14363	MYC	Arabidopsis thaliana	122	+	CAATTG
224	G14363	STRE	Arabidopsis thaliana	141	-	AGGGG
224	G14363	TATA-box	Arabidopsis thaliana	349	-	TATATAA	core promoter element around -30 of transcription start
224	G14363	TATA-box	Brassica napus	348	+	ATTATA	core promoter element around -30 of transcription start
224	G14363	TATA-box	Arabidopsis thaliana	74	+	TATA	core promoter element around -30 of transcription start
224	G14363	TATA-box	Brassica oleracea	304	+	ATATAA	core promoter element around -30 of transcription start
224	G14363	TATA-box	Arabidopsis thaliana	352	-	TATA	core promoter element around -30 of transcription start
224	G14363	TATA-box	Arabidopsis thaliana	305	-	TATA	core promoter element around -30 of transcription start
224	G14363	TATA-box	Arabidopsis thaliana	350	-	TATATA	core promoter element around -30 of transcription start
224	G14363	TATA-box	Arabidopsis thaliana	99	+	TATA	core promoter element around -30 of transcription start
224	G14363	TATA-box	Arabidopsis thaliana	284	-	TATA	core promoter element around -30 of transcription start
224	G14363	Unnamed__1	Zea mays	34	+	CGTGG
224	G14363	Unnamed__2	Petroselinum hortense	49	+	AACCTAACCT
224	G14363	Unnamed__4	Petroselinum hortense	491	+	CTCC
224	G14363	WRE3	Pisum sativum	134	+	CCACCT
224.225	G7760	AAGAA-motif	Avena sativa	930	-	GAAAGAA
224.225	G7760	AAGAA-motif	Avena sativa	596	+	GAAAGAA
224.225	G7760	AAGAA-motif	Avena sativa	418	-	GAAAGAA
224.225	G7760	AAGAA-motif	Avena sativa	411	+	GAAAGAA
224.225	G7760	ABRE	Arabidopsis thaliana	820	-	ACGTG	cis-acting element involved in the abscisic acid responsiveness
224.225	G7760	ABRE	Triticum aestivum	342	-	GACACGTGGC	cis-acting element involved in the abscisic acid responsiveness
224.225	G7760	AT~TATA-box	Arabidopsis thaliana	992	-	TATATA
224.225	G7760	AT~TATA-box	Arabidopsis thaliana	255	+	TATATA
224.225	G7760	AT~TATA-box	Arabidopsis thaliana	791	-	TATATA
224.225	G7760	CAAT-box	Nicotiana glutinosa	900	-	CAAT
224.225	G7760	CAAT-box	Pisum sativum	143	+	CAAAT	common cis-acting element in promoter and enhancer regions
224.225	G7760	CAAT-box	Nicotiana glutinosa	66	-	CAAT
224.225	G7760	CAAT-box	Pisum sativum	905	-	CAAAT	common cis-acting element in promoter and enhancer regions
224.225	G7760	CAAT-box	Nicotiana glutinosa	297	+	CAAT
224.225	G7760	CAAT-box	Nicotiana glutinosa	941	-	CAAT
224.225	G7760	CAAT-box	Nicotiana glutinosa	131	+	CAAT
224.225	G7760	CAAT-box	Nicotiana glutinosa	696	-	CAAT
224.225	G7760	CAAT-box	Nicotiana glutinosa	210	-	CAAT
224.225	G7760	CAAT-box	Nicotiana glutinosa	951	-	CAAT
224.225	G7760	CAAT-box	Nicotiana glutinosa	157	-	CAAT
224.225	G7760	CAAT-box	Nicotiana glutinosa	636	-	CAAT
224.225	G7760	CAAT-box	Nicotiana glutinosa	753	-	CAAT
224.225	G7760	CAAT-box	Nicotiana glutinosa	432	-	CAAT
224.225	G7760	CAAT-box	Nicotiana glutinosa	118	-	CAAT
224.225	G7760	CAAT-box	Pisum sativum	916	-	CAAAT	common cis-acting element in promoter and enhancer regions
224.225	G7760	CAAT-box	Nicotiana glutinosa	264	+	CAAT
224.225	G7760	CAAT-box	Pisum sativum	555	-	CAAAT	common cis-acting element in promoter and enhancer regions
224.225	G7760	CAAT-box	Nicotiana glutinosa	133	-	CAAT
224.225	G7760	CAAT-box	Nicotiana glutinosa	573	-	CAAT
224.225	G7760	CAAT-box	Nicotiana glutinosa	165	+	CAAT
224.225	G7760	CAAT-box	Pisum sativum	922	+	CAAAT	common cis-acting element in promoter and enhancer regions
224.225	G7760	CAAT-box	Nicotiana glutinosa	496	+	CAAT
224.225	G7760	CAAT-box	Nicotiana glutinosa	325	+	CAAT
224.225	G7760	CAAT-box	Nicotiana glutinosa	363	-	CAAT
224.225	G7760	CAT-box	Arabidopsis thaliana	449	-	GCCACT	cis-acting regulatory element related to meristem expression
224.225	G7760	CGTCA-motif	Hordeum vulgare	322	+	CGTCA	cis-acting regulatory element involved in the MeJA-responsiveness
224.225	G7760	DRE1	Zea mays	455	+	ACCGAGA
224.225	G7760	DRE1	Zea mays	578	+	ACCGAGA
224.225	G7760	G-Box	Pisum sativum	820	+	CACGTT	cis-acting regulatory element involved in light responsiveness
224.225	G7760	GC-motif	Zea mays	318	+	CCCCCG	enhancer-like element involved in anoxic specific inducibility
224.225	G7760	MYB	Arabidopsis thaliana	180	-	TAACCA
224.225	G7760	MYB-like sequence	Arabidopsis thaliana	180	-	TAACCA
224.225	G7760	MYC	Arabidopsis thaliana	344	-	CATGTG
224.225	G7760	MYC	Arabidopsis thaliana	131	+	CAATTG
224.225	G7760	Myb	Arabidopsis thaliana	234	+	TAACTG
224.225	G7760	STRE	Arabidopsis thaliana	826	+	AGGGG
224.225	G7760	TATA-box	Arabidopsis thaliana	994	-	TATA	core promoter element around -30 of transcription start
224.225	G7760	TATA-box	Arabidopsis thaliana	232	+	TATA	core promoter element around -30 of transcription start
224.225	G7760	TATA-box	Helianthus annuus	200	-	TATAAA	core promoter element around -30 of transcription start
224.225	G7760	TATA-box	Brassica juncea	199	-	TATAAAT	core promoter element around -30 of transcription start
224.225	G7760	TATA-box	Brassica napus	991	-	ATATAT	core promoter element around -30 of transcription start
224.225	G7760	TATA-box	Arabidopsis thaliana	255	+	TATATA	core promoter element around -30 of transcription start
224.225	G7760	TATA-box	Brassica napus	911	+	ATTATA	core promoter element around -30 of transcription start
224.225	G7760	TATA-box	Arabidopsis thaliana	793	-	TATA	core promoter element around -30 of transcription start
224.225	G7760	TATA-box	Arabidopsis thaliana	791	-	TATATA	core promoter element around -30 of transcription start
224.225	G7760	TATA-box	Arabidopsis thaliana	29	+	TATA	core promoter element around -30 of transcription start
224.225	G7760	TATA-box	Brassica oleracea	231	+	ATATAA	core promoter element around -30 of transcription start
224.225	G7760	TATA-box	Arabidopsis thaliana	202	+	TATA	core promoter element around -30 of transcription start
224.225	G7760	TATA-box	Arabidopsis thaliana	913	-	TATA	core promoter element around -30 of transcription start
224.225	G7760	TATA-box	Arabidopsis thaliana	257	+	TATA	core promoter element around -30 of transcription start
224.225	G7760	TATA-box	Arabidopsis thaliana	912	-	TATAA	core promoter element around -30 of transcription start
224.225	G7760	TATA-box	Arabidopsis thaliana	201	-	TATAA	core promoter element around -30 of transcription start
224.225	G7760	TATA-box	Arabidopsis thaliana	992	-	TATATA	core promoter element around -30 of transcription start
224.225	G7760	TATA-box	Daucus carota	198	-	TATAAATA	core promoter element around -30 of transcription start
224.225	G7760	TATA-box	Brassica napus	792	-	ATATAT	core promoter element around -30 of transcription start
224.225	G7760	TATA-box	Brassica oleracea	28	+	ATATAA	core promoter element around -30 of transcription start
224.225	G7760	TATA-box	Oryza sativa	881	-	TACATAAA	core promoter element around -30 of transcription start
224.225	G7760	TATA-box	Oryza sativa	193	-	TACAAAA	core promoter element around -30 of transcription start
224.225	G7760	TCT-motif	Arabidopsis thaliana	784	-	TCTTAC	part of a light responsive element
224.225	G7760	TGACG-motif	Hordeum vulgare	322	-	TGACG	cis-acting regulatory element involved in the MeJA-responsiveness
224.225	G7760	Unnamed__4	Petroselinum hortense	89	+	CTCC
224.225	G7760	Unnamed__4	Petroselinum hortense	700	+	CTCC
224.225	G7760	W box	Arabidopsis thaliana	158	+	TTGACC
224.225	G7760	WUN-motif	Nicotiana glutinosa	888	+	AAATTACT
224.225	G7760	as-1	Arabidopsis thaliana	322	-	TGACG
225	G10371	CAAT-box	Nicotiana glutinosa	307	+	CAAT
225	G10371	CAAT-box	Pisum sativum	121	-	CAAAT	common cis-acting element in promoter and enhancer regions
225	G10371	CAAT-box	Pisum sativum	111	-	CAAAT	common cis-acting element in promoter and enhancer regions
225	G10371	CAAT-box	Pisum sativum	89	+	CAAAT	common cis-acting element in promoter and enhancer regions
225	G10371	CAAT-box	Nicotiana glutinosa	363	-	CAAT
225	G10371	CAAT-box	Nicotiana glutinosa	18	+	CAAT
225	G10371	CAAT-box	Arabidopsis thaliana	37	-	CCAAT	common cis-acting element in promoter and enhancer regions
225	G10371	CAAT-box	Arabidopsis thaliana	323	-	CCAAT	common cis-acting element in promoter and enhancer regions
225	G10371	CAAT-box	Arabidopsis thaliana	76	-	CCAAT	common cis-acting element in promoter and enhancer regions
225	G10371	CAAT-box	Nicotiana glutinosa	204	-	CAAT
225	G10371	CAAT-box	Nicotiana glutinosa	30	+	CAAT
225	G10371	G-box	Zea mays	251	+	CACGAC	cis-acting regulatory element involved in light responsiveness
225	G10371	LTR	Hordeum vulgare	332	+	CCGAAA	cis-acting element involved in low-temperature responsiveness
225	G10371	MBS	Arabidopsis thaliana	379	-	CAACTG	MYB binding site involved in drought-inducibility
225	G10371	MYB	Arabidopsis thaliana	232	+	CAACCA
225	G10371	Myb	Arabidopsis thaliana	379	-	CAACTG
225	G10371	Myc	Arabidopsis thaliana	457	-	TCTCTTA
225	G10371	STRE	Arabidopsis thaliana	464	+	AGGGG
225	G10371	TATA-box	Arabidopsis thaliana	53	+	TATA	core promoter element around -30 of transcription start
225	G10371	TATA-box	Brassica oleracea	52	+	ATATAA	core promoter element around -30 of transcription start
225	G10371	TATA-box	Zea mays	8	-	TATAAGAA	core promoter element around -30 of transcription start
225	G10371	TATA-box	Arabidopsis thaliana	12	+	TATA	core promoter element around -30 of transcription start
225	G10371	TATA-box	Arabidopsis thaliana	11	-	TATAA	core promoter element around -30 of transcription start
225	G10371	TCA-element	Nicotiana tabacum	413	-	CCATCTTTTT	cis-acting element involved in salicylic acid responsiveness
225	G10371	Unnamed__1	Zea mays	250	-	CGTGG
225	G10371	Unnamed__4	Petroselinum hortense	137	-	CTCC
225	G10371	Unnamed__4	Petroselinum hortense	467	-	CTCC
225	G10371	Unnamed__4	Petroselinum hortense	409	-	CTCC
225	G15468	Box 4	Petroselinum crispum	305	-	ATTAAT	part of a conserved DNA module involved in light responsiveness
225	G15468	CAAT-box	Nicotiana glutinosa	465	-	CAAT
225	G15468	CAAT-box	Nicotiana glutinosa	447	+	CAAT
225	G15468	CAAT-box	Nicotiana glutinosa	426	+	CAAT
225	G15468	CAAT-box	Pisum sativum	416	-	CAAAT	common cis-acting element in promoter and enhancer regions
225	G15468	CAAT-box	Pisum sativum	353	+	CAAAT	common cis-acting element in promoter and enhancer regions
225	G15468	CAAT-box	Nicotiana glutinosa	362	+	CAAT
225	G15468	CAAT-box	Pisum sativum	319	+	CAAAT	common cis-acting element in promoter and enhancer regions
225	G15468	CAAT-box	Nicotiana glutinosa	250	+	CAAT
225	G15468	CAAT-box	Nicotiana glutinosa	303	+	CAAT
225	G15468	CAAT-box	Nicotiana glutinosa	259	+	CAAT
225	G15468	CAAT-box	Nicotiana glutinosa	144	-	CAAT
225	G15468	CAAT-box	Pisum sativum	100	-	CAAAT	common cis-acting element in promoter and enhancer regions
225	G15468	CAAT-box	Pisum sativum	85	+	CAAAT	common cis-acting element in promoter and enhancer regions
225	G15468	CAAT-box	Pisum sativum	54	+	CAAAT	common cis-acting element in promoter and enhancer regions
225	G15468	CAAT-box	Nicotiana glutinosa	160	-	CAAT
225	G15468	CAAT-box	Nicotiana glutinosa	208	-	CAAT
225	G15468	CGTCA-motif	Hordeum vulgare	51	+	CGTCA	cis-acting regulatory element involved in the MeJA-responsiveness
225	G15468	GARE-motif	Brassica oleracea	346	+	TCTGTTG	gibberellin-responsive element
225	G15468	GT1-motif	Arabidopsis thaliana	117	+	GGTTAA	light responsive element
225	G15468	LTR	Hordeum vulgare	289	-	CCGAAA	cis-acting element involved in low-temperature responsiveness
225	G15468	MBS	Arabidopsis thaliana	276	+	CAACTG	MYB binding site involved in drought-inducibility
225	G15468	MYB	Arabidopsis thaliana	347	-	CAACAG
225	G15468	MYC	Arabidopsis thaliana	415	+	CATTTG
225	G15468	MYC	Arabidopsis thaliana	99	+	CATTTG
225	G15468	Myb	Arabidopsis thaliana	276	+	CAACTG
225	G15468	Myb-binding site	Nicotiana tabacum	347	-	CAACAG
225	G15468	TATA	Arabidopsis thaliana	73	-	TATAAAAT
225	G15468	TATA-box	Helianthus annuus	194	-	TATACA	core promoter element around -30 of transcription start
225	G15468	TATA-box	Arabidopsis thaliana	196	+	TATA	core promoter element around -30 of transcription start
225	G15468	TATA-box	Arabidopsis thaliana	243	+	TATA	core promoter element around -30 of transcription start
225	G15468	TATA-box	Oryza sativa	191	-	TACAAAA	core promoter element around -30 of transcription start
225	G15468	TATA-box	Arabidopsis thaliana	77	+	TATA	core promoter element around -30 of transcription start
225	G15468	TATA-box	Arabidopsis thaliana	76	-	TATAA	core promoter element around -30 of transcription start
225	G15468	TATA-box	Pisum sativum	74	-	TATAAAA	core promoter element around -30 of transcription start
225	G15468	TATA-box	Helianthus annuus	75	-	TATAAA	core promoter element around -30 of transcription start
225	G15468	TATA-box	Arabidopsis thaliana	476	-	TATA	core promoter element around -30 of transcription start
225	G15468	TATA-box	Arabidopsis thaliana	459	-	TATA	core promoter element around -30 of transcription start
225	G15468	TATA-box	Arabidopsis thaliana	458	-	TATAA	core promoter element around -30 of transcription start
225	G15468	TATA-box	Helianthus annuus	457	-	TATAAA	core promoter element around -30 of transcription start
225	G15468	TATA-box	Brassica juncea	456	-	TATAAAT	core promoter element around -30 of transcription start
225	G15468	TGA-element	Brassica oleracea	221	+	AACGAC	auxin-responsive element
225	G15468	TGA-element	Brassica oleracea	29	-	AACGAC	auxin-responsive element
225	G15468	TGA-element	Brassica oleracea	111	+	AACGAC	auxin-responsive element
225	G15468	TGA-element	Brassica oleracea	46	+	AACGAC	auxin-responsive element
225	G15468	TGACG-motif	Hordeum vulgare	51	-	TGACG	cis-acting regulatory element involved in the MeJA-responsiveness
225	G15468	Unnamed__4	Petroselinum hortense	387	+	CTCC
225	G15468	Unnamed__4	Petroselinum hortense	397	+	CTCC
225	G15468	as-1	Arabidopsis thaliana	51	-	TGACG
225	G20381	AAGAA-motif	Avena sativa	596	+	GAAAGAA
225	G20381	ARE	Zea mays	423	-	AAACCA	cis-acting regulatory element essential for the anaerobic induction
225	G20381	ARE	Zea mays	752	-	AAACCA	cis-acting regulatory element essential for the anaerobic induction
225	G20381	AT~TATA-box	Arabidopsis thaliana	923	-	TATATA
225	G20381	AT~TATA-box	Arabidopsis thaliana	921	-	TATATA
225	G20381	AT~TATA-box	Arabidopsis thaliana	919	-	TATATA
225	G20381	CAAT-box	Nicotiana glutinosa	794	-	CAAT
225	G20381	CAAT-box	Pisum sativum	662	-	CAAAT	common cis-acting element in promoter and enhancer regions
225	G20381	CAAT-box	Pisum sativum	787	+	CAAAT	common cis-acting element in promoter and enhancer regions
225	G20381	CAAT-box	Arabidopsis thaliana	553	+	CCAAT	common cis-acting element in promoter and enhancer regions
225	G20381	CAAT-box	Nicotiana glutinosa	554	+	CAAT
225	G20381	CAAT-box	Pisum sativum	534	-	CAAAT	common cis-acting element in promoter and enhancer regions
225	G20381	CAAT-box	Nicotiana glutinosa	618	-	CAAT
225	G20381	CAAT-box	Pisum sativum	896	-	CAAAT	common cis-acting element in promoter and enhancer regions
225	G20381	CAAT-box	Arabidopsis thaliana	409	-	CCAAT	common cis-acting element in promoter and enhancer regions
225	G20381	CAAT-box	Nicotiana glutinosa	432	-	CAAT
225	G20381	CAAT-box	Nicotiana glutinosa	22	-	CAAT
225	G20381	CAAT-box	Pisum sativum	843	-	CAAAT	common cis-acting element in promoter and enhancer regions
225	G20381	CAAT-box	Nicotiana glutinosa	841	+	CAAT
225	G20381	CAAT-box	Nicotiana glutinosa	527	-	CAAT
225	G20381	CAAT-box	Nicotiana glutinosa	171	-	CAAT
225	G20381	CAAT-box	Nicotiana glutinosa	580	-	CAAT
225	G20381	CAAT-box	Nicotiana glutinosa	474	-	CAAT
225	G20381	CAAT-box	Nicotiana glutinosa	481	-	CAAT
225	G20381	CAAT-box	Nicotiana glutinosa	606	-	CAAT
225	G20381	CGTCA-motif	Hordeum vulgare	153	-	CGTCA	cis-acting regulatory element involved in the MeJA-responsiveness
225	G20381	G-box	Zea mays	43	-	CACGAC	cis-acting regulatory element involved in light responsiveness
225	G20381	MRE	Petroselinum crispum	640	-	AACCTAA	MYB binding site involved in light responsiveness
225	G20381	MYC	Arabidopsis thaliana	787	-	CATTTG
225	G20381	STRE	Arabidopsis thaliana	881	+	AGGGG
225	G20381	TATA-box	Brassica napus	922	-	ATATAT	core promoter element around -30 of transcription start
225	G20381	TATA-box	Arabidopsis thaliana	934	-	TATAA	core promoter element around -30 of transcription start
225	G20381	TATA-box	Arabidopsis thaliana	913	-	TATA	core promoter element around -30 of transcription start
225	G20381	TATA-box	Brassica oleracea	912	+	ATATAA	core promoter element around -30 of transcription start
225	G20381	TATA-box	Helianthus annuus	767	-	TATACA	core promoter element around -30 of transcription start
225	G20381	TATA-box	Daucus carota	931	-	TATAAATA	core promoter element around -30 of transcription start
225	G20381	TATA-box	Arabidopsis thaliana	958	-	TATTTAAA	core promoter element around -30 of transcription start
225	G20381	TATA-box	Brassica juncea	932	-	TATAAAT	core promoter element around -30 of transcription start
225	G20381	TATA-box	Avena sativa	919	+	TATATTTATATTT	core promoter element around -30 of transcription start
225	G20381	TATA-box	Arabidopsis thaliana	935	-	TATA	core promoter element around -30 of transcription start
225	G20381	TATA-box	Arabidopsis thaliana	923	-	TATATA	core promoter element around -30 of transcription start
225	G20381	TATA-box	Brassica napus	920	-	ATATAT	core promoter element around -30 of transcription start
225	G20381	TATA-box	Brassica napus	924	-	ATATAT	core promoter element around -30 of transcription start
225	G20381	TATA-box	Helianthus annuus	933	-	TATAAA	core promoter element around -30 of transcription start
225	G20381	TATA-box	Arabidopsis thaliana	925	-	TATA	core promoter element around -30 of transcription start
225	G20381	TATA-box	Avena sativa	929	+	TATATTTATATTT	core promoter element around -30 of transcription start
225	G20381	TATA-box	Arabidopsis thaliana	918	-	TATATAA	core promoter element around -30 of transcription start
225	G20381	TATA-box	Brassica napus	917	+	ATTATA	core promoter element around -30 of transcription start
225	G20381	TATA-box	Arabidopsis thaliana	763	-	TATA	core promoter element around -30 of transcription start
225	G20381	TATA-box	Brassica napus	762	-	ATATAT	core promoter element around -30 of transcription start
225	G20381	TATA-box	Arabidopsis thaliana	921	-	TATATA	core promoter element around -30 of transcription start
225	G20381	TATA-box	Arabidopsis thaliana	769	-	TATA	core promoter element around -30 of transcription start
225	G20381	TCT-motif	Arabidopsis thaliana	679	-	TCTTAC	part of a light responsive element
225	G20381	TGACG-motif	Hordeum vulgare	153	+	TGACG	cis-acting regulatory element involved in the MeJA-responsiveness
225	G20381	Unnamed__4	Petroselinum hortense	18	+	CTCC
225	G20381	Unnamed__4	Petroselinum hortense	272	+	CTCC
225	G20381	Unnamed__4	Petroselinum hortense	59	+	CTCC
225	G20381	Unnamed__4	Petroselinum hortense	116	+	CTCC
225	G20381	W box	Arabidopsis thaliana	172	+	TTGACC
225	G20381	as-1	Arabidopsis thaliana	153	+	TGACG
225	G6182	AAGAA-motif	Avena sativa	891	+	GAAAGAA
225	G6182	AAGAA-motif	Avena sativa	408	+	GAAAGAA
225	G6182	AAGAA-motif	Avena sativa	404	+	GAAAGAA
225	G6182	AE-box	Arabidopsis thaliana	868	-	AGAAACTT	part of a module for light response
225	G6182	ARE	Zea mays	432	+	AAACCA	cis-acting regulatory element essential for the anaerobic induction
225	G6182	ARE	Zea mays	93	+	AAACCA	cis-acting regulatory element essential for the anaerobic induction
225	G6182	AT~TATA-box	Arabidopsis thaliana	346	+	TATATA
225	G6182	AT~TATA-box	Arabidopsis thaliana	30	+	TATATA
225	G6182	CAAT-box	Arabidopsis thaliana	598	+	CCAAT	common cis-acting element in promoter and enhancer regions
225	G6182	CAAT-box	Nicotiana glutinosa	975	-	CAAT
225	G6182	CAAT-box	Nicotiana glutinosa	919	+	CAAT
225	G6182	CAAT-box	Nicotiana glutinosa	628	+	CAAT
225	G6182	CAAT-box	Nicotiana glutinosa	933	-	CAAT
225	G6182	CAAT-box	Nicotiana glutinosa	294	-	CAAT
225	G6182	CAAT-box	Arabidopsis thaliana	465	-	CCAAT	common cis-acting element in promoter and enhancer regions
225	G6182	CAAT-box	Nicotiana glutinosa	592	-	CAAT
225	G6182	CAAT-box	Nicotiana glutinosa	436	+	CAAT
225	G6182	CAAT-box	Pisum sativum	638	-	CAAAT	common cis-acting element in promoter and enhancer regions
225	G6182	CAAT-box	Nicotiana glutinosa	649	-	CAAT
225	G6182	CAAT-box	Nicotiana glutinosa	622	-	CAAT
225	G6182	CAAT-box	Arabidopsis thaliana	435	+	CCAAT	common cis-acting element in promoter and enhancer regions
225	G6182	CAAT-box	Nicotiana glutinosa	157	+	CAAT
225	G6182	CAAT-box	Nicotiana glutinosa	752	+	CAAT
225	G6182	CAAT-box	Nicotiana glutinosa	599	+	CAAT
225	G6182	CAAT-box	Pisum sativum	129	-	CAAAT	common cis-acting element in promoter and enhancer regions
225	G6182	CAAT-box	Pisum sativum	487	-	CAAAT	common cis-acting element in promoter and enhancer regions
225	G6182	CAAT-box	Nicotiana glutinosa	13	-	CAAT
225	G6182	CAAT-box	Nicotiana glutinosa	601	-	CAAT
225	G6182	CAAT-box	Pisum sativum	291	+	CAAAT	common cis-acting element in promoter and enhancer regions
225	G6182	CAAT-box	Nicotiana glutinosa	526	+	CAAT
225	G6182	ERE	Nicotiana glutinos	789	-	ATTTCATA
225	G6182	ERE	Nicotiana glutinos	528	+	ATTTTAAA
225	G6182	ERE	Nicotiana glutinos	301	-	ATTTTAAA
225	G6182	ERE	Nicotiana glutinos	47	-	ATTTCATA
225	G6182	GA-motif	Arabidopsis thaliana	310	+	ATAGATAA	part of a light responsive element
225	G6182	MBS	Arabidopsis thaliana	497	+	CAACTG	MYB binding site involved in drought-inducibility
225	G6182	MRE	Petroselinum crispum	257	+	AACCTAA	MYB binding site involved in light responsiveness
225	G6182	MYB	Arabidopsis thaliana	796	+	TAACCA
225	G6182	MYB	Arabidopsis thaliana	132	-	CAACCA
225	G6182	MYB	Arabidopsis thaliana	467	-	CAACCA
225	G6182	MYB-like sequence	Arabidopsis thaliana	796	+	TAACCA
225	G6182	MYC	Arabidopsis thaliana	599	-	CAATTG
225	G6182	Myb	Arabidopsis thaliana	497	+	CAACTG
225	G6182	Myc	Arabidopsis thaliana	631	+	TCTCTTA
225	G6182	P-box	Oryza sativa	800	-	CCTTTTG	gibberellin-responsive element
225	G6182	STRE	Arabidopsis thaliana	694	+	AGGGG
225	G6182	TATA	Arabidopsis thaliana	185	-	TATAAAAT
225	G6182	TATA	Arabidopsis thaliana	775	-	TATAAAAT
225	G6182	TATA-box	Arabidopsis thaliana	779	-	TATA	core promoter element around -30 of transcription start
225	G6182	TATA-box	Arabidopsis thaliana	915	-	TATA	core promoter element around -30 of transcription start
225	G6182	TATA-box	Arabidopsis thaliana	778	-	TATAA	core promoter element around -30 of transcription start
225	G6182	TATA-box	Pisum sativum	776	-	TATAAAA	core promoter element around -30 of transcription start
225	G6182	TATA-box	Zea mays	70	-	TATAAGAA	core promoter element around -30 of transcription start
225	G6182	TATA-box	Helianthus annuus	777	-	TATAAA	core promoter element around -30 of transcription start
225	G6182	TATA-box	Arabidopsis thaliana	74	+	TATA	core promoter element around -30 of transcription start
225	G6182	TATA-box	Arabidopsis thaliana	321	+	TATA	core promoter element around -30 of transcription start
225	G6182	TATA-box	Arabidopsis thaliana	73	-	TATAA	core promoter element around -30 of transcription start
225	G6182	TATA-box	Arabidopsis thaliana	672	+	TATTTAAA	core promoter element around -30 of transcription start
225	G6182	TATA-box	Arabidopsis thaliana	348	+	TATA	core promoter element around -30 of transcription start
225	G6182	TATA-box	Arabidopsis thaliana	32	+	TATA	core promoter element around -30 of transcription start
225	G6182	TATA-box	Brassica napus	29	+	ATATAT	core promoter element around -30 of transcription start
225	G6182	TATA-box	Brassica oleracea	31	+	ATATAA	core promoter element around -30 of transcription start
225	G6182	TATA-box	Arabidopsis thaliana	189	+	TATA	core promoter element around -30 of transcription start
225	G6182	TATA-box	Arabidopsis thaliana	188	-	TATAA	core promoter element around -30 of transcription start
225	G6182	TATA-box	Oryza sativa	210	+	TACATAAA	core promoter element around -30 of transcription start
225	G6182	TATA-box	Arabidopsis thaliana	197	+	TATA	core promoter element around -30 of transcription start
225	G6182	TATA-box	Helianthus annuus	187	-	TATAAA	core promoter element around -30 of transcription start
225	G6182	TATA-box	Arabidopsis thaliana	118	+	TATTTAAA	core promoter element around -30 of transcription start
225	G6182	TATA-box	Arabidopsis thaliana	30	+	TATATA	core promoter element around -30 of transcription start
225	G6182	TATA-box	Arabidopsis thaliana	372	+	TATA	core promoter element around -30 of transcription start
225	G6182	TATA-box	Arabidopsis thaliana	377	+	TATA	core promoter element around -30 of transcription start
225	G6182	TATA-box	Arabidopsis thaliana	72	+	ccTATAAAaa	core promoter element around -30 of transcription start
225	G6182	TATA-box	Pisum sativum	186	-	TATAAAA	core promoter element around -30 of transcription start
225	G6182	TATA-box	Arabidopsis thaliana	346	+	TATATA	core promoter element around -30 of transcription start
225	G6182	TATA-box	Arabidopsis thaliana	108	+	TATA	core promoter element around -30 of transcription start
225	G6182	TATA-box	Brassica oleracea	347	+	ATATAA	core promoter element around -30 of transcription start
225	G6182	TCT-motif	Arabidopsis thaliana	949	+	TCTTAC	part of a light responsive element
225	G6182	Unnamed__4	Petroselinum hortense	971	+	CTCC
225	G6182	Unnamed__4	Petroselinum hortense	277	+	CTCC
225	G6182	Unnamed__4	Petroselinum hortense	697	-	CTCC
225	G6182	Unnamed__4	Petroselinum hortense	854	-	CTCC
224	G14592	AAGAA-motif	Avena sativa	511	+	GAAAGAA
224	G14592	AE-box	Arabidopsis thaliana	859	+	AGAAACAA	part of a module for light response
224	G14592	ARE	Zea mays	922	+	AAACCA	cis-acting regulatory element essential for the anaerobic induction
224	G14592	ARE	Zea mays	663	+	AAACCA	cis-acting regulatory element essential for the anaerobic induction
224	G14592	AT~TATA-box	Arabidopsis thaliana	729	-	TATATA
224	G14592	AT~TATA-box	Arabidopsis thaliana	949	-	TATATA
224	G14592	AT~TATA-box	Arabidopsis thaliana	731	-	TATATA
224	G14592	AT~TATA-box	Arabidopsis thaliana	387	+	TATATA
224	G14592	Box 4	Petroselinum crispum	791	-	ATTAAT	part of a conserved DNA module involved in light responsiveness
224	G14592	CAAT-box	Nicotiana glutinosa	995	+	CAAT
224	G14592	CAAT-box	Nicotiana glutinosa	930	+	CAAT
224	G14592	CAAT-box	Nicotiana glutinosa	740	-	CAAT
224	G14592	CAAT-box	Nicotiana glutinosa	738	+	CAAT
224	G14592	CAAT-box	Nicotiana glutinosa	721	+	CAAT
224	G14592	CAAT-box	Nicotiana glutinosa	709	+	CAAT
224	G14592	CAAT-box	Nicotiana glutinosa	686	+	CAAT
224	G14592	CAAT-box	Nicotiana glutinosa	550	-	CAAT
224	G14592	CAAT-box	Nicotiana glutinosa	406	+	CAAT
224	G14592	CAAT-box	Nicotiana glutinosa	241	-	CAAT
224	G14592	CAAT-box	Nicotiana glutinosa	76	+	CAAT
224	G14592	CAAT-box	Pisum sativum	963	+	CAAAT	common cis-acting element in promoter and enhancer regions
224	G14592	CAAT-box	Pisum sativum	579	-	CAAAT	common cis-acting element in promoter and enhancer regions
224	G14592	CAAT-box	Pisum sativum	966	-	CAAAT	common cis-acting element in promoter and enhancer regions
224	G14592	CAAT-box	Pisum sativum	522	+	CAAAT	common cis-acting element in promoter and enhancer regions
224	G14592	CAAT-box	Pisum sativum	5	-	CAAAT	common cis-acting element in promoter and enhancer regions
224	G14592	CAAT-box	Nicotiana glutinosa	481	+	CAAT
224	G14592	CCAAT-box	Arabidopsis thaliana	994	+	CCAAT	common cis-acting element in promoter and enhancer regions
224	G14592	GATA-motif	Solanum tuberosum	160	-	AAGGATAAGG	part of a light responsive element
224	G14592	GATA-motif	Solanum tuberosum	23	-	AAGGATAAGG	part of a light responsive element
224	G14592	GT1-motif	Arabidopsis thaliana	113	-	GGTTAA	light responsive element
224	G14592	GT1-motif	Avena sativa	112	-	GGTTAAT	light responsive element
224	G14592	MBSI	Petunia hybrida	114	-	aaaAaaC(G/C)GTTA	MYB binding site involved in flavonoid biosynthetic genes regulation
224	G14592	MYC	Arabidopsis thaliana	522	-	CATTTG
224	G14592	MYC	Arabidopsis thaliana	738	-	CAATTG
224	G14592	MYC	Arabidopsis thaliana	578	+	CATTTG
224	G14592	O2-site	Zea mays	746	-	GATGATGTGG	cis-acting regulatory element involved in zein metabolism regulation
224	G14592	STRE	Arabidopsis thaliana	158	-	AGGGG
224	G14592	STRE	Arabidopsis thaliana	867	+	AGGGG
224	G14592	TATA-box	Brassica napus	331	+	ATTATA	core promoter element around -30 of transcription start
224	G14592	TATA-box	Brassica oleracea	950	+	ATATAA	core promoter element around -30 of transcription start
224	G14592	TATA-box	Arabidopsis thaliana	694	-	TATA	core promoter element around -30 of transcription start
224	G14592	TATA-box	Brassica napus	732	-	ATATAT	core promoter element around -30 of transcription start
224	G14592	TATA-box	Brassica napus	728	-	ATATAT	core promoter element around -30 of transcription start
224	G14592	TATA-box	Arabidopsis thaliana	733	-	TATA	core promoter element around -30 of transcription start
224	G14592	TATA-box	Arabidopsis thaliana	389	+	TATA	core promoter element around -30 of transcription start
224	G14592	TATA-box	Arabidopsis thaliana	977	-	TATA	core promoter element around -30 of transcription start
224	G14592	TATA-box	Arabidopsis thaliana	333	+	TATA	core promoter element around -30 of transcription start
224	G14592	TATA-box	Arabidopsis thaliana	731	-	TATATA	core promoter element around -30 of transcription start
224	G14592	TATA-box	Arabidopsis thaliana	729	-	TATATA	core promoter element around -30 of transcription start
224	G14592	TATA-box	Arabidopsis thaliana	951	-	TATA	core promoter element around -30 of transcription start
224	G14592	TATA-box	Brassica napus	730	-	ATATAT	core promoter element around -30 of transcription start
224	G14592	TATA-box	Arabidopsis thaliana	949	-	TATATA	core promoter element around -30 of transcription start
224	G14592	TATA-box	Arabidopsis thaliana	693	-	TATAA	core promoter element around -30 of transcription start
224	G14592	TATA-box	Arabidopsis thaliana	332	-	TATAA	core promoter element around -30 of transcription start
224	G14592	TATA-box	Arabidopsis thaliana	387	+	TATATA	core promoter element around -30 of transcription start
224	G14592	TCCC-motif	Spinacia oleracea	433	-	TCTCCCT	part of a light responsive element
224	G14592	Unnamed__4	Petroselinum hortense	464	-	CTCC
224	G14592	Unnamed__4	Petroselinum hortense	304	-	CTCC
224	G14592	Unnamed__4	Petroselinum hortense	410	-	CTCC
224	G14592	Unnamed__4	Petroselinum hortense	395	-	CTCC
224	G14592	Unnamed__4	Petroselinum hortense	596	+	CTCC
224	G14592	Unnamed__4	Petroselinum hortense	435	-	CTCC
224	G14592	Unnamed__4	Petroselinum hortense	460	-	CTCC
224	G14592	Unnamed__4	Petroselinum hortense	17	+	CTCC
224	G14592	Unnamed__4	Petroselinum hortense	283	-	CTCC
224	G14592	Unnamed__4	Petroselinum hortense	374	-	CTCC
224	G14592	W box	Arabidopsis thaliana	606	-	TTGACC
224	G14592	W box	Arabidopsis thaliana	853	-	TTGACC
224	G14592	circadian	Lycopersicon esculentum	234	+	CAAAGATATC	cis-acting regulatory element involved in circadian control
224	G14791	AP-1	Arabidopsis thaliana	688	+	TGAGTTAG
224	G14791	ARE	Zea mays	342	+	AAACCA	cis-acting regulatory element essential for the anaerobic induction
224	G14791	AT~TATA-box	Arabidopsis thaliana	433	+	TATATA
224	G14791	AT~TATA-box	Arabidopsis thaliana	195	+	TATATA
224	G14791	AT~TATA-box	Arabidopsis thaliana	308	+	TATATA
224	G14791	CAAT-box	Pisum sativum	457	+	CAAAT	common cis-acting element in promoter and enhancer regions
224	G14791	CCAAT-box	Arabidopsis thaliana	188	-	CCAAT	common cis-acting element in promoter and enhancer regions
224	G14791	CAAT-box	Pisum sativum	360	-	CAAAT	common cis-acting element in promoter and enhancer regions
224	G14791	CAAT-box	Nicotiana glutinosa	681	-	CAAT
224	G14791	CAAT-box	Nicotiana glutinosa	283	+	CAAT
224	G14791	CAAT-box	Nicotiana glutinosa	629	-	CAAT
224	G14791	CAAT-box	Pisum sativum	392	-	CAAAT	common cis-acting element in promoter and enhancer regions
224	G14791	CAAT-box	Nicotiana glutinosa	879	+	CAAT
224	G14791	CAAT-box	Nicotiana glutinosa	22	-	CAAT
224	G14791	CAAT-box	Nicotiana glutinosa	390	+	CAAT
224	G14791	CAAT-box	Pisum sativum	104	-	CAAAT	common cis-acting element in promoter and enhancer regions
224	G14791	CAAT-box	Nicotiana glutinosa	400	+	CAAT
224	G14791	CAAT-box	Pisum sativum	602	-	CAAAT	common cis-acting element in promoter and enhancer regions
224	G14791	CAAT-box	Nicotiana glutinosa	180	+	CAAT
224	G14791	CAAT-box	Nicotiana glutinosa	813	-	CAAT
224	G14791	CAAT-box	Nicotiana glutinosa	89	-	CAAT
224	G14791	CAAT-box	Pisum sativum	958	+	CAAAT	common cis-acting element in promoter and enhancer regions
224	G14791	CAAT-box	Nicotiana glutinosa	609	-	CAAT
224	G14791	CAAT-box	Nicotiana glutinosa	594	-	CAAT
224	G14791	CAAT-box	Nicotiana glutinosa	607	+	CAAT
224	G14791	CAT-box	Arabidopsis thaliana	798	-	GCCACT	cis-acting regulatory element related to meristem expression
224	G14791	CCAAT-box	Hordeum vulgare	669	-	CAACGG	MYBHv1 binding site
224	G14791	ERE	Nicotiana glutinos	881	+	ATTTCATA
224	G14791	GT1-motif	Arabidopsis thaliana	859	-	GGTTAA	light responsive element
224	G14791	GT1-motif	Avena sativa	858	-	GGTTAAT	light responsive element
224	G14791	MYB recognition site	Arabidopsis thaliana	669	+	CCGTTG
224	G14791	MYC	Arabidopsis thaliana	607	-	CAATTG
224	G14791	MYC	Arabidopsis thaliana	958	-	CATTTG
224	G14791	STRE	Arabidopsis thaliana	893	+	AGGGG
224	G14791	STRE	Arabidopsis thaliana	2	-	AGGGG
224	G14791	TATA	Arabidopsis thaliana	97	-	TATAAAAT
224	G14791	TATA-box	Arabidopsis thaliana	919	-	TATA	core promoter element around -30 of transcription start
224	G14791	TATA-box	Arabidopsis thaliana	350	+	TATA	core promoter element around -30 of transcription start
224	G14791	TATA-box	Arabidopsis thaliana	435	+	TATA	core promoter element around -30 of transcription start
224	G14791	TATA-box	Arabidopsis thaliana	433	+	TATATA	core promoter element around -30 of transcription start
224	G14791	TATA-box	Arabidopsis thaliana	101	+	TATA	core promoter element around -30 of transcription start
224	G14791	TATA-box	Arabidopsis thaliana	918	-	TATAA	core promoter element around -30 of transcription start
224	G14791	TATA-box	Arabidopsis thaliana	569	-	TATA	core promoter element around -30 of transcription start
224	G14791	TATA-box	Brassica napus	432	+	ATATAT	core promoter element around -30 of transcription start
224	G14791	TATA-box	Arabidopsis thaliana	505	-	TATAA	core promoter element around -30 of transcription start
224	G14791	TATA-box	Arabidopsis thaliana	506	-	TATA	core promoter element around -30 of transcription start
224	G14791	TATA-box	Arabidopsis thaliana	197	+	TATA	core promoter element around -30 of transcription start
224	G14791	TATA-box	Helianthus annuus	917	-	TATAAA	core promoter element around -30 of transcription start
224	G14791	TATA-box	Arabidopsis thaliana	568	-	TATAA	core promoter element around -30 of transcription start
224	G14791	TATA-box	Brassica napus	567	+	ATTATA	core promoter element around -30 of transcription start
224	G14791	TATA-box	Arabidopsis thaliana	121	+	TATA	core promoter element around -30 of transcription start
224	G14791	TATA-box	Pisum sativum	916	-	TATAAAA	core promoter element around -30 of transcription start
224	G14791	TATA-box	Arabidopsis thaliana	195	+	TATATA	core promoter element around -30 of transcription start
224	G14791	TATA-box	Arabidopsis thaliana	308	+	TATATA	core promoter element around -30 of transcription start
224	G14791	TATA-box	Arabidopsis thaliana	310	+	TATA	core promoter element around -30 of transcription start
224	G14791	TATA-box	Arabidopsis thaliana	204	+	TATA	core promoter element around -30 of transcription start
224	G14791	TATA-box	Arabidopsis thaliana	100	-	TATAA	core promoter element around -30 of transcription start
224	G14791	TATA-box	Oryza sativa	148	+	TACAAAA	core promoter element around -30 of transcription start
224	G14791	TATA-box	Oryza sativa	326	+	TACAAAA	core promoter element around -30 of transcription start
224	G14791	TATA-box	Brassica oleracea	309	+	ATATAA	core promoter element around -30 of transcription start
224	G14791	TATA-box	Helianthus annuus	348	-	TATACA	core promoter element around -30 of transcription start
224	G14791	TATA-box	Pisum sativum	98	-	TATAAAA	core promoter element around -30 of transcription start
224	G14791	TATA-box	Brassica napus	194	+	ATATAT	core promoter element around -30 of transcription start
224	G14791	TATA-box	Helianthus annuus	99	-	TATAAA	core promoter element around -30 of transcription start
224	G14791	TATA-box	Arabidopsis thaliana	120	-	TATAA	core promoter element around -30 of transcription start
224	G14791	Unnamed__4	Petroselinum hortense	334	+	CTCC
224	G14791	Unnamed__4	Petroselinum hortense	733	+	CTCC
224	G14791	Unnamed__4	Petroselinum hortense	743	+	CTCC
224	G14791	W box	Arabidopsis thaliana	397	-	TTGACC
224	G15513	AAGAA-motif	Avena sativa	317	+	GAAAGAA
224	G15513	AAGAA-motif	Avena sativa	315	+	gGTAAAGAAA
224	G15513	ABRE	Arabidopsis thaliana	919	-	ACGTG	cis-acting element involved in the abscisic acid responsiveness
224	G15513	AT~TATA-box	Arabidopsis thaliana	988	-	TATATA
224	G15513	AT~TATA-box	Arabidopsis thaliana	986	-	TATATA
224	G15513	Box 4	Petroselinum crispum	5	+	ATTAAT	part of a conserved DNA module involved in light responsiveness
224	G15513	CAAT-box	Pisum sativum	287	+	CAAAT	common cis-acting element in promoter and enhancer regions
224	G15513	CAAT-box	Pisum sativum	593	+	CAAAT	common cis-acting element in promoter and enhancer regions
224	G15513	CAAT-box	Nicotiana glutinosa	361	-	CAAT
224	G15513	CAAT-box	Nicotiana glutinosa	691	-	CAAT
224	G15513	CAAT-box	Nicotiana glutinosa	178	-	CAAT
224	G15513	CAAT-box	Pisum sativum	643	+	CAAAT	common cis-acting element in promoter and enhancer regions
224	G15513	CAAT-box	Nicotiana glutinosa	467	+	CAAT
224	G15513	CAAT-box	Pisum sativum	842	-	CAAAT	common cis-acting element in promoter and enhancer regions
224	G15513	CAAT-box	Pisum sativum	148	+	CAAAT	common cis-acting element in promoter and enhancer regions
224	G15513	CAAT-box	Nicotiana glutinosa	603	-	CAAT
224	G15513	CAAT-box	Nicotiana glutinosa	420	-	CAAT
224	G15513	CAAT-box	Nicotiana glutinosa	722	-	CAAT
224	G15513	CAAT-box	Nicotiana glutinosa	239	+	CAAT
224	G15513	CAAT-box	Nicotiana glutinosa	557	+	CAAT
224	G15513	CAAT-box	Nicotiana glutinosa	636	+	CAAT
224	G15513	CAAT-box	Nicotiana glutinosa	198	+	CAAT
224	G15513	CAAT-box	Nicotiana glutinosa	840	+	CAAT
224	G15513	CAAT-box	Nicotiana glutinosa	200	-	CAAT
224	G15513	G-box	Zea mays	919	+	CACGTC	cis-acting regulatory element involved in light responsiveness
224	G15513	GATA-motif	Arabidopsis thaliana	429	+	GATAGGA	part of a light responsive element
224	G15513	MBSI	Petunia hybrida	117	-	aaaAaaC(G/C)GTTA	MYB binding site involved in flavonoid biosynthetic genes regulation
224	G15513	MYB	Arabidopsis thaliana	302	-	TAACCA
224	G15513	MYB-like sequence	Arabidopsis thaliana	302	-	TAACCA
224	G15513	MYC	Arabidopsis thaliana	198	+	CAATTG
224	G15513	TATA	Arabidopsis thaliana	539	-	TATAAAAT
224	G15513	TATA-box	Arabidopsis thaliana	543	-	TATA	core promoter element around -30 of transcription start
224	G15513	TATA-box	Arabidopsis thaliana	28	+	TATA	core promoter element around -30 of transcription start
224	G15513	TATA-box	Arabidopsis thaliana	853	-	TATA	core promoter element around -30 of transcription start
224	G15513	TATA-box	Arabidopsis thaliana	871	-	TATA	core promoter element around -30 of transcription start
224	G15513	TATA-box	Arabidopsis thaliana	985	-	TATATAA	core promoter element around -30 of transcription start
224	G15513	TATA-box	Arabidopsis thaliana	248	+	TATA	core promoter element around -30 of transcription start
224	G15513	TATA-box	Arabidopsis thaliana	83	+	TATA	core promoter element around -30 of transcription start
224	G15513	TATA-box	Arabidopsis thaliana	816	-	TATA	core promoter element around -30 of transcription start
224	G15513	TATA-box	Helianthus annuus	851	-	TATACA	core promoter element around -30 of transcription start
224	G15513	TATA-box	Arabidopsis thaliana	937	-	TATA	core promoter element around -30 of transcription start
224	G15513	TATA-box	Brassica napus	375	+	ATATAT	core promoter element around -30 of transcription start
224	G15513	TATA-box	Arabidopsis thaliana	639	-	TATA	core promoter element around -30 of transcription start
224	G15513	TATA-box	Brassica napus	936	-	ATATAT	core promoter element around -30 of transcription start
224	G15513	TATA-box	Arabidopsis thaliana	821	-	TATA	core promoter element around -30 of transcription start
224	G15513	TATA-box	Helianthus annuus	81	-	TATAAA	core promoter element around -30 of transcription start
224	G15513	TATA-box	Arabidopsis thaliana	269	+	TATA	core promoter element around -30 of transcription start
224	G15513	TATA-box	Oryza sativa	527	+	TACAAAA	core promoter element around -30 of transcription start
224	G15513	TATA-box	Arabidopsis thaliana	153	+	TATTTAAA	core promoter element around -30 of transcription start
224	G15513	TATA-box	Oryza sativa	848	-	TACAAAA	core promoter element around -30 of transcription start
224	G15513	TATA-box	Brassica napus	819	+	ATTATA	core promoter element around -30 of transcription start
224	G15513	TATA-box	Brassica napus	984	+	ATTATA	core promoter element around -30 of transcription start
224	G15513	TATA-box	Arabidopsis thaliana	542	-	TATAA	core promoter element around -30 of transcription start
224	G15513	TATA-box	Arabidopsis thaliana	376	+	TATA	core promoter element around -30 of transcription start
224	G15513	TATA-box	Arabidopsis thaliana	779	-	TATAA	core promoter element around -30 of transcription start
224	G15513	TATA-box	Arabidopsis thaliana	82	-	TATAA	core promoter element around -30 of transcription start
224	G15513	TATA-box	Brassica napus	267	+	ATTATA	core promoter element around -30 of transcription start
224	G15513	TATA-box	Brassica oleracea	114	+	ATATAA	core promoter element around -30 of transcription start
224	G15513	TATA-box	Arabidopsis thaliana	870	-	TATAA	core promoter element around -30 of transcription start
224	G15513	TATA-box	Arabidopsis thaliana	268	-	TATAA	core promoter element around -30 of transcription start
224	G15513	TATA-box	Arabidopsis thaliana	820	-	TATAA	core promoter element around -30 of transcription start
224	G15513	TATA-box	Arabidopsis thaliana	815	-	TATAA	core promoter element around -30 of transcription start
224	G15513	TATA-box	Helianthus annuus	814	-	TATAAA	core promoter element around -30 of transcription start
224	G15513	TATA-box	Brassica juncea	80	-	TATAAAT	core promoter element around -30 of transcription start
224	G15513	TATA-box	Brassica napus	778	+	ATTATA	core promoter element around -30 of transcription start
224	G15513	TATA-box	Brassica juncea	813	-	TATAAAT	core promoter element around -30 of transcription start
224	G15513	TATA-box	Brassica napus	869	+	ATTATA	core promoter element around -30 of transcription start
224	G15513	TATA-box	Arabidopsis thaliana	115	+	TATA	core promoter element around -30 of transcription start
224	G15513	TATA-box	Pisum sativum	540	-	TATAAAA	core promoter element around -30 of transcription start
224	G15513	TATA-box	Arabidopsis thaliana	780	-	TATA	core promoter element around -30 of transcription start
224	G15513	TATA-box	Daucus carota	812	-	TATAAATA	core promoter element around -30 of transcription start
224	G15513	TATA-box	Arabidopsis thaliana	509	-	TATA	core promoter element around -30 of transcription start
224	G15513	TATA-box	Oryza sativa	743	+	TACAAAA	core promoter element around -30 of transcription start
224	G15513	TATA-box	Brassica napus	989	-	ATATAT	core promoter element around -30 of transcription start
224	G15513	TATA-box	Helianthus annuus	541	-	TATAAA	core promoter element around -30 of transcription start
224	G15513	TATA-box	Brassica napus	987	-	ATATAT	core promoter element around -30 of transcription start
224	G15513	TATA-box	Brassica oleracea	732	+	ATATAA	core promoter element around -30 of transcription start
224	G15513	TATA-box	Arabidopsis thaliana	986	-	TATATA	core promoter element around -30 of transcription start
224	G15513	TATA-box	Arabidopsis thaliana	733	-	TATA	core promoter element around -30 of transcription start
224	G15513	TATA-box	Arabidopsis thaliana	990	-	TATA	core promoter element around -30 of transcription start
224	G15513	TATA-box	Arabidopsis thaliana	988	-	TATATA	core promoter element around -30 of transcription start
224	G15513	Unnamed__2	Zea mays	345	+	CCCCGG
224	G15513	Unnamed__4	Petroselinum hortense	499	-	CTCC
224	G15513	Unnamed__4	Petroselinum hortense	927	-	CTCC
224	G15513	Unnamed__4	Petroselinum hortense	161	+	CTCC
224	G15599	AACA_motif	Oryza sativa	227	-	TAACAAACTCCA	involved in endosperm-specific negative expression
224	G15599	AAGAA-motif	Avena sativa	685	+	GAAAGAA
224	G15599	ABRE	Arabidopsis thaliana	857	-	ACGTG	cis-acting element involved in the abscisic acid responsiveness
224	G15599	ABRE	Hordeum vulgare	848	+	CGCACGTGTC	cis-acting element involved in the abscisic acid responsiveness
224	G15599	ABRE	Arabidopsis thaliana	851	+	ACGTG	cis-acting element involved in the abscisic acid responsiveness
224	G15599	ABRE	Arabidopsis thaliana	850	-	CACGTG	cis-acting element involved in the abscisic acid responsiveness
224	G15599	ABRE3a	Zea mays	857	-	TACGTG
224	G15599	ABRE4	Zea mays	857	+	CACGTA
224	G15599	AE-box	Arabidopsis thaliana	622	+	AGAAACAA	part of a module for light response
224	G15599	ARE	Zea mays	302	+	AAACCA	cis-acting regulatory element essential for the anaerobic induction
224	G15599	AT~TATA-box	Arabidopsis thaliana	828	-	TATATA
224	G15599	AT~TATA-box	Arabidopsis thaliana	576	-	TATATA
224	G15599	AT~TATA-box	Arabidopsis thaliana	578	-	TATATA
224	G15599	AT~TATA-box	Arabidopsis thaliana	574	-	TATATA
224	G15599	AT~TATA-box	Arabidopsis thaliana	740	-	TATATA
224	G15599	Box 4	Petroselinum crispum	833	-	ATTAAT	part of a conserved DNA module involved in light responsiveness
224	G15599	CAAT-box	Nicotiana glutinosa	393	+	CAAT
224	G15599	CAAT-box	Petunia hybrida	365	-	TGCCAAC	common cis-acting element in promoter and enhancer regions
224	G15599	CAAT-box	Pisum sativum	287	-	CAAAT	common cis-acting element in promoter and enhancer regions
224	G15599	CAAT-box	Pisum sativum	892	+	CAAAT	common cis-acting element in promoter and enhancer regions
224	G15599	CCAAT-box	Arabidopsis thaliana	981	+	CCAAT	common cis-acting element in promoter and enhancer regions
224	G15599	CAAT-box	Pisum sativum	947	-	CAAAT	common cis-acting element in promoter and enhancer regions
224	G15599	CAAT-box	Pisum sativum	955	-	CAAAT	common cis-acting element in promoter and enhancer regions
224	G15599	CAAT-box	Nicotiana glutinosa	649	+	CAAT
224	G15599	CAAT-box	Pisum sativum	654	-	CAAAT	common cis-acting element in promoter and enhancer regions
224	G15599	CAAT-box	Nicotiana glutinosa	433	+	CAAT
224	G15599	CAAT-box	Nicotiana glutinosa	996	-	CAAT
224	G15599	CAAT-box	Nicotiana glutinosa	982	+	CAAT
224	G15599	CAAT-box	Nicotiana glutinosa	60	-	CAAT
224	G15599	CAAT-box	Pisum sativum	543	+	CAAAT	common cis-acting element in promoter and enhancer regions
224	G15599	CAAT-box	Nicotiana glutinosa	785	-	CAAT
224	G15599	CAAT-box	Pisum sativum	708	+	CAAAT	common cis-acting element in promoter and enhancer regions
224	G15599	CAAT-box	Nicotiana glutinosa	149	-	CAAT
224	G15599	CAAT-box	Nicotiana glutinosa	271	-	CAAT
224	G15599	CAAT-box	Nicotiana glutinosa	969	+	CAAT
224	G15599	CAAT-box	Nicotiana glutinosa	606	+	CAAT
224	G15599	CAAT-box	Nicotiana glutinosa	89	-	CAAT
224	G15599	CAT-box	Arabidopsis thaliana	338	+	GCCACT	cis-acting regulatory element related to meristem expression
224	G15599	CGTCA-motif	Hordeum vulgare	71	-	CGTCA	cis-acting regulatory element involved in the MeJA-responsiveness
224	G15599	CTAG-motif	Avena sativa	551	+	ACTAGCAGAA
224	G15599	ERE	Nicotiana glutinos	28	-	ATTTCATA
224	G15599	ERE	Nicotiana glutinos	759	-	ATTTTAAA
224	G15599	G-Box	Pisum sativum	850	-	CACGTG	cis-acting regulatory element involved in light responsiveness
224	G15599	G-box	Arabidopsis thaliana	857	-	TACGTG	cis-acting regulatory element involved in light responsiveness
224	G15599	G-box	Arabidopsis thaliana	850	-	CACGTG	cis-acting regulatory element involved in light responsiveness
224	G15599	MYB	Arabidopsis thaliana	723	+	TAACCA
224	G15599	MYB-like sequence	Arabidopsis thaliana	723	+	TAACCA
224	G15599	MYC	Arabidopsis thaliana	708	-	CATTTG
224	G15599	MYC	Arabidopsis thaliana	286	+	CATTTG
224	G15599	MYC	Arabidopsis thaliana	176	+	CATGTG
224	G15599	Myb	Arabidopsis thaliana	975	-	TAACTG
224	G15599	Myb	Arabidopsis thaliana	185	+	TAACTG
224	G15599	STRE	Arabidopsis thaliana	324	+	AGGGG
224	G15599	TATA-box	Brassica napus	829	-	ATATAT	core promoter element around -30 of transcription start
224	G15599	TATA-box	Arabidopsis thaliana	830	-	TATA	core promoter element around -30 of transcription start
224	G15599	TATA-box	Arabidopsis thaliana	828	-	TATATA	core promoter element around -30 of transcription start
224	G15599	TATA-box	Brassica napus	827	-	ATATAT	core promoter element around -30 of transcription start
224	G15599	TATA-box	Brassica napus	960	-	ATATAT	core promoter element around -30 of transcription start
224	G15599	TATA-box	Arabidopsis thaliana	961	-	TATA	core promoter element around -30 of transcription start
224	G15599	TATA-box	Arabidopsis thaliana	919	-	TATA	core promoter element around -30 of transcription start
224	G15599	TATA-box	Brassica napus	918	-	ATATAT	core promoter element around -30 of transcription start
224	G15599	TATA-box	Arabidopsis thaliana	771	-	TATA	core promoter element around -30 of transcription start
224	G15599	TATA-box	Arabidopsis thaliana	770	-	TATAA	core promoter element around -30 of transcription start
224	G15599	TATA-box	Arabidopsis thaliana	742	-	TATA	core promoter element around -30 of transcription start
224	G15599	TATA-box	Brassica napus	769	+	ATTATA	core promoter element around -30 of transcription start
224	G15599	TATA-box	Arabidopsis thaliana	740	-	TATATA	core promoter element around -30 of transcription start
224	G15599	TATA-box	Brassica oleracea	741	+	ATATAA	core promoter element around -30 of transcription start
224	G15599	TATA-box	Arabidopsis thaliana	698	-	TATA	core promoter element around -30 of transcription start
224	G15599	TATA-box	Helianthus annuus	738	-	TATACA	core promoter element around -30 of transcription start
224	G15599	TATA-box	Arabidopsis thaliana	678	-	TATAA	core promoter element around -30 of transcription start
224	G15599	TATA-box	Arabidopsis thaliana	679	-	TATA	core promoter element around -30 of transcription start
224	G15599	TATA-box	Arabidopsis thaliana	697	-	TATAA	core promoter element around -30 of transcription start
224	G15599	TATA-box	Arabidopsis thaliana	645	-	TATA	core promoter element around -30 of transcription start
224	G15599	TATA-box	Arabidopsis thaliana	644	-	TATAA	core promoter element around -30 of transcription start
224	G15599	TATA-box	Arabidopsis thaliana	580	-	TATA	core promoter element around -30 of transcription start
224	G15599	TATA-box	Brassica oleracea	579	+	ATATAA	core promoter element around -30 of transcription start
224	G15599	TATA-box	Brassica napus	577	-	ATATAT	core promoter element around -30 of transcription start
224	G15599	TATA-box	Arabidopsis thaliana	578	-	TATATA	core promoter element around -30 of transcription start
224	G15599	TATA-box	Helianthus annuus	643	-	TATAAA	core promoter element around -30 of transcription start
224	G15599	TATA-box	Arabidopsis thaliana	576	-	TATATA	core promoter element around -30 of transcription start
224	G15599	TATA-box	Brassica napus	575	-	ATATAT	core promoter element around -30 of transcription start
224	G15599	TATA-box	Arabidopsis thaliana	574	-	TATATA	core promoter element around -30 of transcription start
224	G15599	TATA-box	Arabidopsis thaliana	155	+	TATA	core promoter element around -30 of transcription start
224	G15599	TATA-box	Helianthus annuus	572	-	TATACA	core promoter element around -30 of transcription start
224	G15599	TATA-box	Brassica napus	696	+	ATTATA	core promoter element around -30 of transcription start
224	G15599	TGACG-motif	Hordeum vulgare	71	+	TGACG	cis-acting regulatory element involved in the MeJA-responsiveness
224	G15599	Unnamed__1	Zea mays	357	-	CGTGG
224	G15599	Unnamed__4	Petroselinum hortense	491	+	CTCC
224	G15599	Unnamed__4	Petroselinum hortense	352	-	CTCC
224	G15599	Unnamed__4	Petroselinum hortense	327	-	CTCC
224	G15599	Unnamed__4	Petroselinum hortense	228	-	CTCC
224	G15599	Unnamed__4	Petroselinum hortense	65	+	CTCC
224	G15599	Unnamed__6	Zea mays	1	+	taTAAATATct
224	G15599	as-1	Arabidopsis thaliana	71	+	TGACG
224	G16954	ABRE	Triticum aestivum	423	-	GACACGTGGC	cis-acting element involved in the abscisic acid responsiveness
224	G16954	AE-box	Arabidopsis thaliana	154	+	AGAAACAA	part of a module for light response
224	G16954	Box 4	Petroselinum crispum	336	-	ATTAAT	part of a conserved DNA module involved in light responsiveness
224	G16954	Box 4	Petroselinum crispum	22	+	ATTAAT	part of a conserved DNA module involved in light responsiveness
224	G16954	Box 4	Petroselinum crispum	170	+	ATTAAT	part of a conserved DNA module involved in light responsiveness
224	G16954	Box 4	Petroselinum crispum	257	-	ATTAAT	part of a conserved DNA module involved in light responsiveness
224	G16954	CAAT-box	Nicotiana glutinosa	168	+	CAAT
224	G16954	CAAT-box	Nicotiana glutinosa	77	-	CAAT
224	G16954	CAAT-box	Nicotiana glutinosa	217	-	CAAT
224	G16954	CAAT-box	Nicotiana glutinosa	63	-	CAAT
224	G16954	CAAT-box	Nicotiana glutinosa	47	+	CAAT
224	G16954	CAAT-box	Nicotiana glutinosa	488	+	CAAT
224	G16954	CAAT-box	Nicotiana glutinosa	185	-	CAAT
224	G16954	CAAT-box	Pisum sativum	26	-	CAAAT	common cis-acting element in promoter and enhancer regions
224	G16954	CAAT-box	Nicotiana glutinosa	293	+	CAAT
224	G16954	CAAT-box	Nicotiana glutinosa	204	-	CAAT
224	G16954	CAAT-box	Nicotiana glutinosa	465	-	CAAT
224	G16954	CAAT-box	Nicotiana glutinosa	295	-	CAAT
224	G16954	CAAT-box	Nicotiana glutinosa	299	-	CAAT
224	G16954	CAAT-box	Nicotiana glutinosa	11	-	CAAT
224	G16954	CAAT-box	Pisum sativum	475	+	CAAAT	common cis-acting element in promoter and enhancer regions
224	G16954	CAAT-box	Nicotiana glutinosa	266	-	CAAT
224	G16954	G-box	Zea mays	430	-	CACGAC	cis-acting regulatory element involved in light responsiveness
224	G16954	MYB	Arabidopsis thaliana	1	+	CAACCA
224	G16954	MYC	Arabidopsis thaliana	475	-	CATTTG
224	G16954	MYC	Arabidopsis thaliana	293	-	CAATTG
224	G16954	STRE	Arabidopsis thaliana	399	+	AGGGG
224	G16954	TATA-box	Arabidopsis thaliana	353	-	TATA	core promoter element around -30 of transcription start
224	G16954	TATA-box	Arabidopsis thaliana	190	+	TATA	core promoter element around -30 of transcription start
224	G16954	TATA-box	Arabidopsis thaliana	189	-	TATAA	core promoter element around -30 of transcription start
224	G16954	TATA-box	Brassica napus	351	+	ATTATA	core promoter element around -30 of transcription start
224	G16954	TATA-box	Arabidopsis thaliana	352	-	TATAA	core promoter element around -30 of transcription start
224	G16954	TCT-motif	Arabidopsis thaliana	175	+	TCTTAC	part of a light responsive element
224	G16954	Unnamed__4	Petroselinum hortense	378	-	CTCC
224	G16954	Unnamed__4	Petroselinum hortense	17	-	CTCC
224	G16954	WRE3	Pisum sativum	424	+	CCACCT
224	G16954	WRE3	Pisum sativum	390	-	CCACCT
224	G16954	box S	Arabidopsis thaliana	391	-	AGCCACC
224	G17313	AT~TATA-box	Arabidopsis thaliana	993	-	TATATA
224	G17313	AT~TATA-box	Arabidopsis thaliana	353	+	TATATA
224	G17313	AT~TATA-box	Arabidopsis thaliana	725	-	TATATA
224	G17313	AuxRR-core	Nicotiana tabacum	443	+	GGTCCAT	cis-acting regulatory element involved in auxin responsiveness
224	G17313	Box 4	Petroselinum crispum	780	-	ATTAAT	part of a conserved DNA module involved in light responsiveness
224	G17313	Box 4	Petroselinum crispum	72	+	ATTAAT	part of a conserved DNA module involved in light responsiveness
224	G17313	Box 4	Petroselinum crispum	719	-	ATTAAT	part of a conserved DNA module involved in light responsiveness
224	G17313	Box 4	Petroselinum crispum	872	-	ATTAAT	part of a conserved DNA module involved in light responsiveness
224	G17313	Box 4	Petroselinum crispum	329	+	ATTAAT	part of a conserved DNA module involved in light responsiveness
224	G17313	Box 4	Petroselinum crispum	399	+	ATTAAT	part of a conserved DNA module involved in light responsiveness
224	G17313	CCAAT-box	Arabidopsis thaliana	271	-	CCAAT	common cis-acting element in promoter and enhancer regions
224	G17313	CAAT-box	Pisum sativum	467	-	CAAAT	common cis-acting element in promoter and enhancer regions
224	G17313	CAAT-box	Nicotiana glutinosa	405	-	CAAT
224	G17313	CAAT-box	Nicotiana glutinosa	125	-	CAAT
224	G17313	CAAT-box	Pisum sativum	977	+	CAAAT	common cis-acting element in promoter and enhancer regions
224	G17313	CAAT-box	Nicotiana glutinosa	905	-	CAAT
224	G17313	CAAT-box	Pisum sativum	878	-	CAAAT	common cis-acting element in promoter and enhancer regions
224	G17313	CAAT-box	Pisum sativum	793	-	CAAAT	common cis-acting element in promoter and enhancer regions
224	G17313	CAAT-box	Nicotiana glutinosa	259	+	CAAT
224	G17313	CAAT-box	Nicotiana glutinosa	702	-	CAAT
224	G17313	CAAT-box	Nicotiana glutinosa	679	+	CAAT
224	G17313	CAAT-box	Nicotiana glutinosa	688	+	CAAT
224	G17313	CAAT-box	Nicotiana glutinosa	594	+	CAAT
224	G17313	CAAT-box	Nicotiana glutinosa	255	+	CAAT
224	G17313	CAAT-box	Pisum sativum	370	+	CAAAT	common cis-acting element in promoter and enhancer regions
224	G17313	CAAT-box	Nicotiana glutinosa	611	-	CAAT
224	G17313	CAAT-box	Nicotiana glutinosa	45	+	CAAT
224	G17313	CAAT-box	Pisum sativum	227	-	CAAAT	common cis-acting element in promoter and enhancer regions
224	G17313	CAAT-box	Pisum sativum	57	+	CAAAT	common cis-acting element in promoter and enhancer regions
224	G17313	CAAT-box	Pisum sativum	522	+	CAAAT	common cis-acting element in promoter and enhancer regions
224	G17313	CAAT-box	Pisum sativum	538	+	CAAAT	common cis-acting element in promoter and enhancer regions
224	G17313	CGTCA-motif	Hordeum vulgare	102	+	CGTCA	cis-acting regulatory element involved in the MeJA-responsiveness
224	G17313	ERE	Nicotiana glutinos	784	+	ATTTTAAA
224	G17313	GT1-motif	Arabidopsis thaliana	274	+	GGTTAA	light responsive element
224	G17313	GT1-motif	Avena sativa	813	+	GGTTAAT	light responsive element
224	G17313	GT1-motif	Avena sativa	239	+	GGTTAAT	light responsive element
224	G17313	GT1-motif	Avena sativa	757	+	GGTTAAT	light responsive element
224	G17313	MYB	Arabidopsis thaliana	756	-	TAACCA
224	G17313	MYB	Arabidopsis thaliana	273	-	TAACCA
224	G17313	MYB	Arabidopsis thaliana	174	+	TAACCA
224	G17313	MYB	Arabidopsis thaliana	835	-	CAACCA
224	G17313	MYB-like sequence	Arabidopsis thaliana	174	+	TAACCA
224	G17313	MYB-like sequence	Arabidopsis thaliana	756	-	TAACCA
224	G17313	MYB-like sequence	Arabidopsis thaliana	273	-	TAACCA
224	G17313	MYC	Arabidopsis thaliana	977	-	CATTTG
224	G17313	MYC	Arabidopsis thaliana	538	-	CATTTG
224	G17313	Myb	Arabidopsis thaliana	668	-	TAACTG
224	G17313	Myb	Arabidopsis thaliana	82	-	TAACTG
224	G17313	Myc	Arabidopsis thaliana	391	+	TCTCTTA
224	G17313	TATA	Arabidopsis thaliana	197	-	TATAAAAT
224	G17313	TATA-box	Arabidopsis thaliana	672	-	TATA	core promoter element around -30 of transcription start
224	G17313	TATA-box	Arabidopsis thaliana	995	-	TATA	core promoter element around -30 of transcription start
224	G17313	TATA-box	Arabidopsis thaliana	727	-	TATA	core promoter element around -30 of transcription start
224	G17313	TATA-box	Arabidopsis thaliana	577	-	TATA	core promoter element around -30 of transcription start
224	G17313	TATA-box	Brassica napus	575	+	ATTATA	core promoter element around -30 of transcription start
224	G17313	TATA-box	Arabidopsis thaliana	200	-	TATAA	core promoter element around -30 of transcription start
224	G17313	TATA-box	Arabidopsis thaliana	576	-	TATAA	core promoter element around -30 of transcription start
224	G17313	TATA-box	Arabidopsis thaliana	355	+	TATA	core promoter element around -30 of transcription start
224	G17313	TATA-box	Arabidopsis thaliana	353	+	TATATA	core promoter element around -30 of transcription start
224	G17313	TATA-box	Arabidopsis thaliana	695	-	TATAA	core promoter element around -30 of transcription start
224	G17313	TATA-box	Brassica napus	726	-	ATATAT	core promoter element around -30 of transcription start
224	G17313	TATA-box	Arabidopsis thaliana	725	-	TATATA	core promoter element around -30 of transcription start
224	G17313	TATA-box	Arabidopsis thaliana	724	-	TATATAA	core promoter element around -30 of transcription start
224	G17313	TATA-box	Arabidopsis thaliana	234	+	TATA	core promoter element around -30 of transcription start
224	G17313	TATA-box	Helianthus annuus	351	-	TATACA	core promoter element around -30 of transcription start
224	G17313	TATA-box	Arabidopsis thaliana	752	-	TATA	core promoter element around -30 of transcription start
224	G17313	TATA-box	Arabidopsis thaliana	130	-	TATAA	core promoter element around -30 of transcription start
224	G17313	TATA-box	Arabidopsis thaliana	131	+	TATA	core promoter element around -30 of transcription start
224	G17313	TATA-box	Brassica oleracea	76	+	ATATAA	core promoter element around -30 of transcription start
224	G17313	TATA-box	Arabidopsis thaliana	77	+	TATA	core promoter element around -30 of transcription start
224	G17313	TATA-box	Brassica napus	694	+	ATTATA	core promoter element around -30 of transcription start
224	G17313	TATA-box	Brassica napus	723	+	ATTATA	core promoter element around -30 of transcription start
224	G17313	TATA-box	Helianthus annuus	129	-	TATAAA	core promoter element around -30 of transcription start
224	G17313	TATA-box	Brassica napus	994	-	ATATAT	core promoter element around -30 of transcription start
224	G17313	TATA-box	Arabidopsis thaliana	671	-	TATAA	core promoter element around -30 of transcription start
224	G17313	TATA-box	Helianthus annuus	991	-	TATACA	core promoter element around -30 of transcription start
224	G17313	TATA-box	Arabidopsis thaliana	619	-	TATA	core promoter element around -30 of transcription start
224	G17313	TATA-box	Helianthus annuus	199	-	TATAAA	core promoter element around -30 of transcription start
224	G17313	TATA-box	Arabidopsis thaliana	201	+	TATA	core promoter element around -30 of transcription start
224	G17313	TATA-box	Pisum sativum	198	-	TATAAAA	core promoter element around -30 of transcription start
224	G17313	TATA-box	Brassica oleracea	233	+	ATATAA	core promoter element around -30 of transcription start
224	G17313	TATA-box	Brassica napus	750	+	ATTATA	core promoter element around -30 of transcription start
224	G17313	TATA-box	Oryza sativa	13	-	TACAAAA	core promoter element around -30 of transcription start
224	G17313	TATA-box	Arabidopsis thaliana	696	-	TATA	core promoter element around -30 of transcription start
224	G17313	TATA-box	Arabidopsis thaliana	751	-	TATAA	core promoter element around -30 of transcription start
224	G17313	TATA-box	Arabidopsis thaliana	993	-	TATATA	core promoter element around -30 of transcription start
224	G17313	TGACG-motif	Hordeum vulgare	102	-	TGACG	cis-acting regulatory element involved in the MeJA-responsiveness
224	G17313	Unnamed__4	Petroselinum hortense	934	-	CTCC
224	G17313	Unnamed__4	Petroselinum hortense	866	-	CTCC
224	G17313	Unnamed__4	Petroselinum hortense	506	-	CTCC
224	G17313	WUN-motif	Nicotiana glutinosa	880	-	CCATTTCAA
224	G17313	as-1	Arabidopsis thaliana	102	-	TGACG
224	G17428	AC-II	Phaseolus vulgaris	274	+	CCACCAACCCCC
224	G17428	AE-box	Arabidopsis thaliana	185	-	AGAAACAA	part of a module for light response
224	G17428	ARE	Zea mays	95	-	AAACCA	cis-acting regulatory element essential for the anaerobic induction
224	G17428	ARE	Zea mays	340	+	AAACCA	cis-acting regulatory element essential for the anaerobic induction
224	G17428	CAAT-box	Pisum sativum	183	-	CAAAT	common cis-acting element in promoter and enhancer regions
224	G17428	CCAAT-box	Arabidopsis thaliana	471	-	CCAAT	common cis-acting element in promoter and enhancer regions
224	G17428	CAAT-box	Nicotiana glutinosa	55	+	CAAT
224	G17428	CAAT-box	Nicotiana glutinosa	13	+	CAAT
224	G17428	CAAT-box	Nicotiana glutinosa	285	+	CAAT
224	G17428	CAAT-box	Pisum sativum	36	+	CAAAT	common cis-acting element in promoter and enhancer regions
224	G17428	CAAT-box	Pisum sativum	383	-	CAAAT	common cis-acting element in promoter and enhancer regions
224	G17428	CCAAT-box	Arabidopsis thaliana	93	-	CCAAT	common cis-acting element in promoter and enhancer regions
224	G17428	CCAAT-box	Arabidopsis thaliana	284	+	CCAAT	common cis-acting element in promoter and enhancer regions
224	G17428	CCAAT-box	Arabidopsis thaliana	12	+	CCAAT	common cis-acting element in promoter and enhancer regions
224	G17428	CAAT-box	Pisum sativum	377	-	CAAAT	common cis-acting element in promoter and enhancer regions
224	G17428	CCAAT-box	Arabidopsis thaliana	54	+	CCAAT	common cis-acting element in promoter and enhancer regions
224	G17428	CAAT-box	Nicotiana glutinosa	375	+	CAAT
224	G17428	CAAT-box	Pisum sativum	49	+	CAAAT	common cis-acting element in promoter and enhancer regions
224	G17428	CAAT-box	Nicotiana glutinosa	435	-	CAAT
224	G17428	CAAT-box	Nicotiana glutinosa	149	-	CAAT
224	G17428	CARE	Oryza sativa	312	-	CAACTCAC
224	G17428	ERE	Nicotiana glutinos	20	+	ATTTCATA
224	G17428	GT1-motif	Avena sativa	480	+	GGTTAAT	light responsive element
224	G17428	GT1-motif	Avena sativa	415	+	GGTTAAT	light responsive element
224	G17428	MYC	Arabidopsis thaliana	182	+	CATTTG
224	G17428	MYC	Arabidopsis thaliana	382	+	CATTTG
224	G17428	TATC-box	Oryza sativa	8	+	TATCCCA	cis-acting element involved in gibberellin-responsiveness
224	G17428	Unnamed__4	Petroselinum hortense	118	+	CTCC
224	G17428	Unnamed__4	Petroselinum hortense	74	+	CTCC
224	G17428	Unnamed__4	Petroselinum hortense	332	-	CTCC
224	G17428	WRE3	Pisum sativum	76	+	CCACCT
224	G17693	ABRE	Arabidopsis thaliana	245	+	ACGTG	cis-acting element involved in the abscisic acid responsiveness
224	G17693	ABRE	Arabidopsis thaliana	244	+	CACGTG	cis-acting element involved in the abscisic acid responsiveness
224	G17693	ABRE2	Zea mays	243	+	CCACGTGG
224	G17693	ACE	Petroselinum crispum	344	+	GACACGTATG	cis-acting element involved in light responsiveness
224	G17693	AT1-motif	Solanum tuberosum	852	+	AATTATTTTTTATT	part of a light responsive module
224	G17693	AT~TATA-box	Arabidopsis thaliana	425	+	TATATA
224	G17693	Box II	Petroselinum crispum	242	-	CCACGTGGC	part of a light responsive element
224	G17693	Box III	Pisum sativum	329	-	atCATTTTCACt	protein binding site
224	G17693	CAAT-box	Nicotiana glutinosa	551	+	CAAT
224	G17693	CAAT-box	Nicotiana glutinosa	329	-	CAAT
224	G17693	CAAT-box	Nicotiana glutinosa	725	+	CAAT
224	G17693	CAAT-box	Nicotiana glutinosa	61	+	CAAT
224	G17693	CAAT-box	Nicotiana glutinosa	617	-	CAAT
224	G17693	CAAT-box	Nicotiana glutinosa	585	+	CAAT
224	G17693	CCAAT-box	Arabidopsis thaliana	695	+	CCAAT	common cis-acting element in promoter and enhancer regions
224	G17693	CAAT-box	Nicotiana glutinosa	474	-	CAAT
224	G17693	CAAT-box	Nicotiana glutinosa	969	+	CAAT
224	G17693	CAAT-box	Nicotiana glutinosa	539	-	CAAT
224	G17693	CAAT-box	Pisum sativum	838	+	CAAAT	common cis-acting element in promoter and enhancer regions
224	G17693	CAAT-box	Nicotiana glutinosa	432	+	CAAT
224	G17693	CAAT-box	Nicotiana glutinosa	779	+	CAAT
224	G17693	CAAT-box	Pisum sativum	737	-	CAAAT	common cis-acting element in promoter and enhancer regions
224	G17693	CCAAT-box	Arabidopsis thaliana	391	-	CCAAT	common cis-acting element in promoter and enhancer regions
224	G17693	CAAT-box	Nicotiana glutinosa	104	+	CAAT
224	G17693	CAAT-box	Nicotiana glutinosa	696	+	CAAT
224	G17693	CCAAT-box	Arabidopsis thaliana	374	-	CCAAT	common cis-acting element in promoter and enhancer regions
224	G17693	CAAT-box	Nicotiana glutinosa	841	-	CAAT
224	G17693	CAAT-box	Nicotiana glutinosa	52	+	CAAT
224	G17693	CAAT-box	Nicotiana glutinosa	973	-	CAAT
224	G17693	CCAAT-box	Arabidopsis thaliana	7	-	CCAAT	common cis-acting element in promoter and enhancer regions
224	G17693	CAAT-box	Nicotiana glutinosa	903	-	CAAT
224	G17693	CAAT-box	Nicotiana glutinosa	88	+	CAAT
224	G17693	CAAT-box	Nicotiana glutinosa	833	+	CAAT
224	G17693	CAAT-box	Nicotiana glutinosa	165	+	CAAT
224	G17693	CGTCA-motif	Hordeum vulgare	291	-	CGTCA	cis-acting regulatory element involved in the MeJA-responsiveness
224	G17693	F-box	Lycopersicon esculentum	199	+	CTATTCTCATT
224	G17693	G-Box	Pisum sativum	244	+	CACGTG	cis-acting regulatory element involved in light responsiveness
224	G17693	G-box	Arabidopsis thaliana	244	+	CACGTG	cis-acting regulatory element involved in light responsiveness
224	G17693	G-box	Arabidopsis thaliana	242	+	GCCACGTGGA	cis-acting regulatory element involved in light responsiveness
224	G17693	GATA-motif	Arabidopsis thaliana	253	-	GATAGGA	part of a light responsive element
224	G17693	GATA-motif	Arabidopsis thaliana	166	-	AAGATAAGATT	part of a light responsive element
224	G17693	GT1-motif	Avena sativa	511	-	GGTTAAT	light responsive element
224	G17693	GT1-motif	Arabidopsis thaliana	512	-	GGTTAA	light responsive element
224	G17693	MRE	Petroselinum crispum	911	+	AACCTAA	MYB binding site involved in light responsiveness
224	G17693	MRE	Petroselinum crispum	701	-	AACCTAA	MYB binding site involved in light responsiveness
224	G17693	MRE	Petroselinum crispum	14	-	AACCTAA	MYB binding site involved in light responsiveness
224	G17693	MYC	Arabidopsis thaliana	135	+	CATGTG
224	G17693	STRE	Arabidopsis thaliana	408	-	AGGGG
224	G17693	TATA-box	Arabidopsis thaliana	671	-	TATA	core promoter element around -30 of transcription start
224	G17693	TATA-box	Pisum sativum	460	-	TATAAAA	core promoter element around -30 of transcription start
224	G17693	TATA-box	Helianthus annuus	461	-	TATAAA	core promoter element around -30 of transcription start
224	G17693	TATA-box	Arabidopsis thaliana	364	+	TATA	core promoter element around -30 of transcription start
224	G17693	TATA-box	Arabidopsis thaliana	427	+	TATA	core promoter element around -30 of transcription start
224	G17693	TATA-box	Arabidopsis thaliana	363	-	TATAA	core promoter element around -30 of transcription start
224	G17693	TATA-box	Arabidopsis thaliana	170	-	TATAA	core promoter element around -30 of transcription start
224	G17693	TATA-box	Arabidopsis thaliana	228	+	TATA	core promoter element around -30 of transcription start
224	G17693	TATA-box	Brassica oleracea	426	+	ATATAA	core promoter element around -30 of transcription start
224	G17693	TATA-box	Brassica napus	362	+	ATTATA	core promoter element around -30 of transcription start
224	G17693	TATA-box	Arabidopsis thaliana	603	-	TATA	core promoter element around -30 of transcription start
224	G17693	TATA-box	Arabidopsis thaliana	621	-	TATA	core promoter element around -30 of transcription start
224	G17693	TATA-box	Arabidopsis thaliana	425	+	TATATA	core promoter element around -30 of transcription start
224	G17693	TATA-box	Brassica oleracea	192	+	ATATAA	core promoter element around -30 of transcription start
224	G17693	TATA-box	Arabidopsis thaliana	462	-	TATAA	core promoter element around -30 of transcription start
224	G17693	TATA-box	Brassica napus	424	+	ATATAT	core promoter element around -30 of transcription start
224	G17693	TATA-box	Helianthus annuus	619	-	TATACA	core promoter element around -30 of transcription start
224	G17693	TATA-box	Arabidopsis thaliana	193	+	TATA	core promoter element around -30 of transcription start
224	G17693	TATA-box	Arabidopsis thaliana	171	+	TATA	core promoter element around -30 of transcription start
224	G17693	TATA-box	Arabidopsis thaliana	95	-	TATAA	core promoter element around -30 of transcription start
224	G17693	TATA-box	Arabidopsis thaliana	96	+	TATA	core promoter element around -30 of transcription start
224	G17693	TATA-box	Arabidopsis thaliana	40	+	TATA	core promoter element around -30 of transcription start
224	G17693	TATA-box	Brassica oleracea	39	+	ATATAA	core promoter element around -30 of transcription start
224	G17693	TATA-box	Arabidopsis thaliana	463	+	TATA	core promoter element around -30 of transcription start
224	G17693	TATA-box	Arabidopsis thaliana	47	+	TATA	core promoter element around -30 of transcription start
224	G17693	TATA-box	Brassica napus	94	+	ATTATA	core promoter element around -30 of transcription start
224	G17693	TCA	Pisum sativum	743	-	TCATCTTCAT
224	G17693	TCA	Pisum sativum	842	-	TCATCTTCAT
224	G17693	TCT-motif	Arabidopsis thaliana	497	-	TCTTAC	part of a light responsive element
224	G17693	TGACG-motif	Hordeum vulgare	291	+	TGACG	cis-acting regulatory element involved in the MeJA-responsiveness
224	G17693	Unnamed__1	Petunia sp.	242	+	GCCACGTGGC
224	G17693	Unnamed__1	Zea mays	991	+	CGTGG
224	G17693	Unnamed__1	Zea mays	246	+	CGTGG
224	G17693	Unnamed__1	Zea mays	243	-	CGTGG
224	G17693	Unnamed__1	Zea mays	438	+	CGTGG
224	G17693	Unnamed__4	Petroselinum hortense	978	-	CTCC
224	G17693	Unnamed__4	Petroselinum hortense	286	+	CTCC
224	G17693	Unnamed__4	Petroselinum hortense	981	-	CTCC
224	G17693	Unnamed__4	Petroselinum hortense	954	-	CTCC
224	G17693	Unnamed__4	Petroselinum hortense	957	-	CTCC
224	G17693	WUN-motif	Nicotiana glutinosa	659	-	AAATTACT
224	G17693	as-1	Arabidopsis thaliana	291	+	TGACG
224	G1817	ABRE	Arabidopsis thaliana	119	+	TACGGTC	cis-acting element involved in the abscisic acid responsiveness
224	G1817	ABRE	Arabidopsis thaliana	257	+	ACGTG	cis-acting element involved in the abscisic acid responsiveness
224	G1817	AT~TATA-box	Arabidopsis thaliana	35	+	TATATA
224	G1817	CAAT-box	Nicotiana glutinosa	172	+	CAAT
224	G1817	CAAT-box	Nicotiana glutinosa	145	-	CAAT
224	G1817	CAAT-box	Nicotiana glutinosa	116	+	CAAT
224	G1817	CAAT-box	Nicotiana glutinosa	66	-	CAAT
224	G1817	CAAT-box	Nicotiana glutinosa	76	+	CAAT
224	G1817	CCAAT-box	Arabidopsis thaliana	2	-	CCAAT	common cis-acting element in promoter and enhancer regions
224	G1817	CAAT-box	Nicotiana glutinosa	266	-	CAAT
224	G1817	CAAT-box	Pisum sativum	263	+	CAAAT	common cis-acting element in promoter and enhancer regions
224	G1817	CCAAT-box	Arabidopsis thaliana	456	-	CCAAT	common cis-acting element in promoter and enhancer regions
224	G1817	CCAAT-box	Arabidopsis thaliana	402	-	CCAAT	common cis-acting element in promoter and enhancer regions
224	G1817	CAAT-box	Nicotiana glutinosa	428	-	CAAT
224	G1817	G-Box	Pisum sativum	256	-	CACGTT	cis-acting regulatory element involved in light responsiveness
224	G1817	GATA-motif	Solanum tuberosum	416	+	AAGGATAAGG	part of a light responsive element
224	G1817	MBS	Arabidopsis thaliana	333	+	CAACTG	MYB binding site involved in drought-inducibility
224	G1817	MYB	Arabidopsis thaliana	458	-	TAACCA
224	G1817	MYB-like sequence	Arabidopsis thaliana	458	-	TAACCA
224	G1817	MYC	Arabidopsis thaliana	153	-	CATGTG
224	G1817	Myb	Arabidopsis thaliana	333	+	CAACTG
224	G1817	Myb	Arabidopsis thaliana	199	+	TAACTG
224	G1817	TATA-box	Arabidopsis thaliana	305	-	TATA	core promoter element around -30 of transcription start
224	G1817	TATA-box	Arabidopsis thaliana	37	+	TATA	core promoter element around -30 of transcription start
224	G1817	TATA-box	Arabidopsis thaliana	35	+	TATATA	core promoter element around -30 of transcription start
224	G1817	Unnamed__1	Zea mays	258	+	CGTGG
224	G1817	Unnamed__4	Petroselinum hortense	328	+	CTCC
224	G1817	Unnamed__4	Petroselinum hortense	158	-	CTCC
224	G1817	Unnamed__4	Petroselinum hortense	89	+	CTCC
224	G18456	AAGAA-motif	Avena sativa	942	-	GAAAGAA
224	G18456	ABRE	Hordeum vulgare	846	+	CGTACGTGCA	cis-acting element involved in the abscisic acid responsiveness
224	G18456	ARE	Zea mays	245	+	AAACCA	cis-acting regulatory element essential for the anaerobic induction
224	G18456	CAAT-box	Nicotiana glutinosa	996	+	CAAT
224	G18456	CAAT-box	Nicotiana glutinosa	762	-	CAAT
224	G18456	CAAT-box	Nicotiana glutinosa	964	+	CAAT
224	G18456	CAAT-box	Nicotiana glutinosa	903	+	CAAT
224	G18456	CCAAT-box	Arabidopsis thaliana	228	-	CCAAT	common cis-acting element in promoter and enhancer regions
224	G18456	CAAT-box	Pisum sativum	158	-	CAAAT	common cis-acting element in promoter and enhancer regions
224	G18456	CAAT-box	Nicotiana glutinosa	199	-	CAAT
224	G18456	CAAT-box	Pisum sativum	249	+	CAAAT	common cis-acting element in promoter and enhancer regions
224	G18456	CAAT-box	Nicotiana glutinosa	51	+	CAAT
224	G18456	CAAT-box	Pisum sativum	275	-	CAAAT	common cis-acting element in promoter and enhancer regions
224	G18456	CAAT-box	Nicotiana glutinosa	366	+	CAAT
224	G18456	CAAT-box	Nicotiana glutinosa	111	+	CAAT
224	G18456	CAAT-box	Pisum sativum	893	-	CAAAT	common cis-acting element in promoter and enhancer regions
224	G18456	CCAAT-box	Arabidopsis thaliana	221	-	CCAAT	common cis-acting element in promoter and enhancer regions
224	G18456	CAAT-box	Nicotiana glutinosa	282	-	CAAT
224	G18456	CAAT-box	Pisum sativum	260	-	CAAAT	common cis-acting element in promoter and enhancer regions
224	G18456	CAAT-box	Pisum sativum	82	-	CAAAT	common cis-acting element in promoter and enhancer regions
224	G18456	CAAT-box	Pisum sativum	775	-	CAAAT	common cis-acting element in promoter and enhancer regions
224	G18456	CAAT-box	Pisum sativum	399	+	CAAAT	common cis-acting element in promoter and enhancer regions
224	G18456	CAAT-box	Pisum sativum	155	+	CAAAT	common cis-acting element in promoter and enhancer regions
224	G18456	CAAT-box	Pisum sativum	886	-	CAAAT	common cis-acting element in promoter and enhancer regions
224	G18456	CAAT-box	Pisum sativum	829	+	CAAAT	common cis-acting element in promoter and enhancer regions
224	G18456	CAAT-box	Nicotiana glutinosa	760	+	CAAT
224	G18456	CAAT-box	Pisum sativum	753	-	CAAAT	common cis-acting element in promoter and enhancer regions
224	G18456	CAAT-box	Nicotiana glutinosa	510	+	CAAT
224	G18456	CAAT-box	Pisum sativum	462	-	CAAAT	common cis-acting element in promoter and enhancer regions
224	G18456	CGTCA-motif	Hordeum vulgare	370	+	CGTCA	cis-acting regulatory element involved in the MeJA-responsiveness
224	G18456	ERE	Nicotiana glutinos	65	-	ATTTCATA
224	G18456	GA-motif	Arabidopsis thaliana	699	-	ATAGATAA	part of a light responsive element
224	G18456	GT1-motif	Arabidopsis thaliana	921	-	GGTTAA	light responsive element
224	G18456	LAMP-element	Pisum sativum	355	+	CTTTATCA	part of a light responsive element
224	G18456	MYB	Arabidopsis thaliana	263	-	TAACCA
224	G18456	MYB	Arabidopsis thaliana	684	-	CAACCA
224	G18456	MYB-like sequence	Arabidopsis thaliana	263	-	TAACCA
224	G18456	MYC	Arabidopsis thaliana	259	+	CATTTG
224	G18456	MYC	Arabidopsis thaliana	274	+	CATTTG
224	G18456	MYC	Arabidopsis thaliana	331	-	CATGTG
224	G18456	MYC	Arabidopsis thaliana	760	-	CAATTG
224	G18456	TATA	Arabidopsis thaliana	745	+	TATAAAAT
224	G18456	TATA-box	Brassica napus	672	+	ATTATA	core promoter element around -30 of transcription start
224	G18456	TATA-box	Arabidopsis thaliana	673	-	TATAA	core promoter element around -30 of transcription start
224	G18456	TATA-box	Arabidopsis thaliana	542	-	TATA	core promoter element around -30 of transcription start
224	G18456	TATA-box	Arabidopsis thaliana	710	-	TATA	core promoter element around -30 of transcription start
224	G18456	TATA-box	Arabidopsis thaliana	709	-	TATAA	core promoter element around -30 of transcription start
224	G18456	TATA-box	Arabidopsis thaliana	432	+	TATA	core promoter element around -30 of transcription start
224	G18456	TATA-box	Arabidopsis thaliana	444	+	TATA	core promoter element around -30 of transcription start
224	G18456	TATA-box	Oryza sativa	880	-	TACAAAA	core promoter element around -30 of transcription start
224	G18456	TATA-box	Arabidopsis thaliana	745	-	TATA	core promoter element around -30 of transcription start
224	G18456	TATA-box	Arabidopsis thaliana	842	-	TATA	core promoter element around -30 of transcription start
224	G18456	TATA-box	Helianthus annuus	743	-	TATACA	core promoter element around -30 of transcription start
224	G18456	TATA-box	Oryza sativa	739	-	TACATAAA	core promoter element around -30 of transcription start
224	G18456	TATA-box	Brassica napus	430	+	ATTATA	core promoter element around -30 of transcription start
224	G18456	TATA-box	Arabidopsis thaliana	674	-	TATA	core promoter element around -30 of transcription start
224	G18456	TATA-box	Arabidopsis thaliana	393	+	TATA	core promoter element around -30 of transcription start
224	G18456	TATA-box	Helianthus annuus	708	-	TATAAA	core promoter element around -30 of transcription start
224	G18456	TATA-box	Arabidopsis thaliana	541	-	TATAA	core promoter element around -30 of transcription start
224	G18456	TATA-box	Arabidopsis thaliana	343	+	TATA	core promoter element around -30 of transcription start
224	G18456	TATA-box	Helianthus annuus	442	-	TATAAA	core promoter element around -30 of transcription start
224	G18456	TATA-box	Arabidopsis thaliana	443	-	TATAA	core promoter element around -30 of transcription start
224	G18456	TATA-box	Arabidopsis thaliana	42	+	TATA	core promoter element around -30 of transcription start
224	G18456	TATA-box	Brassica napus	540	+	ATTATA	core promoter element around -30 of transcription start
224	G18456	TATA-box	Arabidopsis thaliana	431	-	TATAA	core promoter element around -30 of transcription start
224	G18456	TATA-box	Arabidopsis thaliana	106	+	TATA	core promoter element around -30 of transcription start
224	G18456	TATA-box	Arabidopsis thaliana	121	+	TATA	core promoter element around -30 of transcription start
224	G18456	TATA-box	Arabidopsis thaliana	342	-	TATAA	core promoter element around -30 of transcription start
224	G18456	TATA-box	Arabidopsis thaliana	189	+	TATA	core promoter element around -30 of transcription start
224	G18456	TCCC-motif	Spinacia oleracea	177	+	TCTCCCT	part of a light responsive element
224	G18456	TCT-motif	Arabidopsis thaliana	238	+	TCTTAC	part of a light responsive element
224	G18456	TGACG-motif	Hordeum vulgare	370	-	TGACG	cis-acting regulatory element involved in the MeJA-responsiveness
224	G18456	Unnamed__4	Petroselinum hortense	178	+	CTCC
224	G18456	Unnamed__4	Petroselinum hortense	560	-	CTCC
224	G18456	W box	Arabidopsis thaliana	152	-	TTGACC
224	G18456	WUN-motif	Nicotiana glutinosa	16	-	AAATTACT
224	G18456	WUN-motif	Nicotiana glutinosa	77	-	AAATTACTA
224	G18456	WUN-motif	Nicotiana glutinosa	78	-	AAATTACT
224	G18456	as-1	Arabidopsis thaliana	370	-	TGACG
224	G19558	ABRE	Arabidopsis thaliana	334	+	ACGTG	cis-acting element involved in the abscisic acid responsiveness
224	G19558	ARE	Zea mays	271	+	AAACCA	cis-acting regulatory element essential for the anaerobic induction
224	G19558	AT~TATA-box	Arabidopsis thaliana	292	-	TATATA
224	G19558	AT~TATA-box	Arabidopsis thaliana	294	-	TATATA
224	G19558	Box 4	Petroselinum crispum	68	+	ATTAAT	part of a conserved DNA module involved in light responsiveness
224	G19558	CAAT-box	Pisum sativum	97	+	CAAAT	common cis-acting element in promoter and enhancer regions
224	G19558	CAAT-box	Nicotiana glutinosa	223	+	CAAT
224	G19558	CAAT-box	Pisum sativum	373	+	CAAAT	common cis-acting element in promoter and enhancer regions
224	G19558	CAAT-box	Nicotiana glutinosa	132	-	CAAT
224	G19558	CAAT-box	Nicotiana glutinosa	78	+	CAAT
224	G19558	CAAT-box	Nicotiana glutinosa	74	+	CAAT
224	G19558	CAAT-box	Nicotiana glutinosa	260	+	CAAT
224	G19558	CAAT-box	Nicotiana glutinosa	100	-	CAAT
224	G19558	CAAT-box	Nicotiana glutinosa	473	+	CAAT
224	G19558	CAAT-box	Pisum sativum	444	+	CAAAT	common cis-acting element in promoter and enhancer regions
224	G19558	CAG-motif	Arabidopsis thaliana	428	+	GAAAGGCAGAC	part of a light response element
224	G19558	G-Box	Pisum sativum	333	-	CACGTT	cis-acting regulatory element involved in light responsiveness
224	G19558	MYB	Arabidopsis thaliana	241	+	TAACCA
224	G19558	MYB-like sequence	Arabidopsis thaliana	241	+	TAACCA
224	G19558	Myb	Arabidopsis thaliana	139	-	TAACTG
224	G19558	TATA-box	Brassica oleracea	295	+	ATATAA	core promoter element around -30 of transcription start
224	G19558	TATA-box	Brassica oleracea	146	+	ATATAA	core promoter element around -30 of transcription start
224	G19558	TATA-box	Arabidopsis thaliana	294	-	TATATA	core promoter element around -30 of transcription start
224	G19558	TATA-box	Arabidopsis thaliana	147	+	TATA	core promoter element around -30 of transcription start
224	G19558	TATA-box	Brassica napus	293	-	ATATAT	core promoter element around -30 of transcription start
224	G19558	TATA-box	Arabidopsis thaliana	292	-	TATATA	core promoter element around -30 of transcription start
224	G19558	TATA-box	Arabidopsis thaliana	296	-	TATA	core promoter element around -30 of transcription start
224	G19558	TATA-box	Arabidopsis thaliana	205	+	TATTTAAA	core promoter element around -30 of transcription start
224	G19558	TATA-box	Arabidopsis thaliana	253	-	TATA	core promoter element around -30 of transcription start
224	G19558	Unnamed__4	Petroselinum hortense	380	+	CTCC
224	G19560	A-box	Petroselinum crispum	292	+	CCGTCC	cis-acting regulatory element
224	G19560	A-box	Petroselinum crispum	74	+	CCGTCC	cis-acting regulatory element
224	G19560	Box II	Solanum tuberosum	458	-	TGGTAATAA	part of a light responsive element
224	G19560	CAAT-box	Nicotiana glutinosa	446	+	CAAT
224	G19560	CAAT-box	Pisum sativum	132	-	CAAAT	common cis-acting element in promoter and enhancer regions
224	G19560	CAAT-box	Nicotiana glutinosa	130	+	CAAT
224	G19560	CAAT-box	Nicotiana glutinosa	124	-	CAAT
224	G19560	CAAT-box	Pisum sativum	9	-	CAAAT	common cis-acting element in promoter and enhancer regions
224	G19560	CAAT-box	Pisum sativum	6	+	CAAAT	common cis-acting element in promoter and enhancer regions
224	G19560	CCAAT-box	Arabidopsis thaliana	335	-	CCAAT	common cis-acting element in promoter and enhancer regions
224	G19560	CAAT-box	Nicotiana glutinosa	333	+	CAAT
224	G19560	CAAT-box	Pisum sativum	277	-	CAAAT	common cis-acting element in promoter and enhancer regions
224	G19560	CAAT-box	Nicotiana glutinosa	187	+	CAAT
224	G19560	CAAT-box	Pisum sativum	401	-	CAAAT	common cis-acting element in promoter and enhancer regions
224	G19560	CAAT-box	Pisum sativum	152	-	CAAAT	common cis-acting element in promoter and enhancer regions
224	G19560	CCAAT-box	Arabidopsis thaliana	445	+	CCAAT	common cis-acting element in promoter and enhancer regions
224	G19560	CCGTCC motif	Nicotiana tabacum	292	+	CCGTCC
224	G19560	CCGTCC motif	Nicotiana tabacum	74	+	CCGTCC
224	G19560	CCGTCC-box	Petroselinum hortense	292	+	CCGTCC
224	G19560	CCGTCC-box	Petroselinum hortense	74	+	CCGTCC
224	G19560	GT1-motif	Avena sativa	357	+	GGTTAAT	light responsive element
224	G19560	I-box	Triticum aestivum	78	-	AGATAAGG	part of a light responsive element
224	G19560	LTR	Hordeum vulgare	229	+	CCGAAA	cis-acting element involved in low-temperature responsiveness
224	G19560	MYB	Arabidopsis thaliana	210	+	CAACCA
224	G19560	MYC	Arabidopsis thaliana	276	+	CATTTG
224	G19560	MYC	Arabidopsis thaliana	333	-	CAATTG
224	G19560	TATA-box	Arabidopsis thaliana	190	+	TATA	core promoter element around -30 of transcription start
224	G19560	TATA-box	Arabidopsis thaliana	40	+	TATA	core promoter element around -30 of transcription start
224	G19560	TATC-box	Oryza sativa	92	-	TATCCCA	cis-acting element involved in gibberellin-responsiveness
224	G19560	TCCC-motif	Spinacia oleracea	34	+	TCTCCCT	part of a light responsive element
224	G19560	Unnamed__4	Petroselinum hortense	324	+	CTCC
224	G19560	Unnamed__4	Petroselinum hortense	241	+	CTCC
224	G19560	Unnamed__4	Petroselinum hortense	106	-	CTCC
224	G19560	Unnamed__4	Petroselinum hortense	53	-	CTCC
224	G19560	Unnamed__4	Petroselinum hortense	431	+	CTCC
224	G19560	Unnamed__4	Petroselinum hortense	35	+	CTCC
224	G19560	Unnamed__4	Petroselinum hortense	248	+	CTCC
224	G19560	Unnamed__4	Petroselinum hortense	338	-	CTCC
224	G19560	Unnamed__4	Petroselinum hortense	227	+	CTCC
224	G19560	Unnamed__4	Petroselinum hortense	443	+	CTCC
224	G19560	WRE3	Pisum sativum	327	+	CCACCT
224	G21621	AAGAA-motif	Avena sativa	410	+	gGTAAAGAAA
224	G21621	ABRE	Arabidopsis thaliana	256	-	ACGTG	cis-acting element involved in the abscisic acid responsiveness
224	G21621	ABRE	Arabidopsis thaliana	13	+	ACGTG	cis-acting element involved in the abscisic acid responsiveness
224	G21621	ARE	Zea mays	699	+	AAACCA	cis-acting regulatory element essential for the anaerobic induction
224	G21621	ARE	Zea mays	551	+	AAACCA	cis-acting regulatory element essential for the anaerobic induction
224	G21621	ARE	Zea mays	252	+	AAACCA	cis-acting regulatory element essential for the anaerobic induction
224	G21621	Box 4	Petroselinum crispum	897	-	ATTAAT	part of a conserved DNA module involved in light responsiveness
224	G21621	Box 4	Petroselinum crispum	871	-	ATTAAT	part of a conserved DNA module involved in light responsiveness
224	G21621	CAAT-box	Nicotiana glutinosa	955	+	CAAT
224	G21621	CAAT-box	Pisum sativum	592	+	CAAAT	common cis-acting element in promoter and enhancer regions
224	G21621	CAAT-box	Pisum sativum	784	-	CAAAT	common cis-acting element in promoter and enhancer regions
224	G21621	CAAT-box	Nicotiana glutinosa	492	+	CAAT
224	G21621	CAAT-box	Pisum sativum	885	+	CAAAT	common cis-acting element in promoter and enhancer regions
224	G21621	CAAT-box	Nicotiana glutinosa	22	-	CAAT
224	G21621	CAAT-box	Pisum sativum	261	+	CAAAT	common cis-acting element in promoter and enhancer regions
224	G21621	CAAT-box	Nicotiana glutinosa	30	-	CAAT
224	G21621	CAAT-box	Nicotiana glutinosa	459	+	CAAT
224	G21621	CAAT-box	Nicotiana glutinosa	450	-	CAAT
224	G21621	CAAT-box	Nicotiana glutinosa	454	+	CAAT
224	G21621	CAAT-box	Pisum sativum	438	-	CAAAT	common cis-acting element in promoter and enhancer regions
224	G21621	CAAT-box	Pisum sativum	426	+	CAAAT	common cis-acting element in promoter and enhancer regions
224	G21621	CAAT-box	Nicotiana glutinosa	404	+	CAAT
224	G21621	CAAT-box	Nicotiana glutinosa	358	-	CAAT
224	G21621	CAAT-box	Nicotiana glutinosa	352	-	CAAT
224	G21621	CAAT-box	Nicotiana glutinosa	419	-	CAAT
224	G21621	CAAT-box	Nicotiana glutinosa	20	+	CAAT
224	G21621	CAAT-box	Nicotiana glutinosa	389	-	CAAT
224	G21621	CAAT-box	Nicotiana glutinosa	464	-	CAAT
224	G21621	CAAT-box	Nicotiana glutinosa	666	-	CAAT
224	G21621	CAAT-box	Nicotiana glutinosa	707	+	CAAT
224	G21621	CAAT-box	Pisum sativum	921	-	CAAAT	common cis-acting element in promoter and enhancer regions
224	G21621	CAAT-box	Nicotiana glutinosa	832	-	CAAT
224	G21621	CAAT-box	Nicotiana glutinosa	842	+	CAAT
224	G21621	CGTCA-motif	Hordeum vulgare	258	+	CGTCA	cis-acting regulatory element involved in the MeJA-responsiveness
224	G21621	DRE1	Zea mays	538	+	ACCGAGA
224	G21621	ERE	Nicotiana glutinos	915	-	ATTTTAAA
224	G21621	G-box	Zea mays	256	+	CACGTC	cis-acting regulatory element involved in light responsiveness
224	G21621	G-box	Zea mays	12	-	CACGTC	cis-acting regulatory element involved in light responsiveness
224	G21621	GT1-motif	Arabidopsis thaliana	806	+	GGTTAA	light responsive element
224	G21621	HD-Zip 1	Arabidopsis thaliana	459	+	CAAT(A/T)ATTG	element involved in differentiation of the palisade mesophyll cells
224	G21621	LTR	Hordeum vulgare	994	+	CCGAAA	cis-acting element involved in low-temperature responsiveness
224	G21621	MYB	Arabidopsis thaliana	189	-	TAACCA
224	G21621	MYB	Arabidopsis thaliana	805	-	TAACCA
224	G21621	MYB-like sequence	Arabidopsis thaliana	805	-	TAACCA
224	G21621	MYB-like sequence	Arabidopsis thaliana	189	-	TAACCA
224	G21621	MYC	Arabidopsis thaliana	426	-	CATTTG
224	G21621	MYC	Arabidopsis thaliana	20	+	CAATTG
224	G21621	P-box	Oryza sativa	184	+	CCTTTTG	gibberellin-responsive element
224	G21621	TATA-box	Arabidopsis thaliana	280	-	TATAA	core promoter element around -30 of transcription start
224	G21621	TATA-box	Brassica oleracea	611	+	ATATAA	core promoter element around -30 of transcription start
224	G21621	TATA-box	Brassica oleracea	927	+	ATATAA	core promoter element around -30 of transcription start
224	G21621	TATA-box	Arabidopsis thaliana	612	-	TATA	core promoter element around -30 of transcription start
224	G21621	TATA-box	Arabidopsis thaliana	407	+	TATA	core promoter element around -30 of transcription start
224	G21621	TATA-box	Oryza sativa	246	-	TACAAAA	core promoter element around -30 of transcription start
224	G21621	TATA-box	Arabidopsis thaliana	928	-	TATA	core promoter element around -30 of transcription start
224	G21621	TATA-box	Oryza sativa	432	+	TACAAAA	core promoter element around -30 of transcription start
224	G21621	TATA-box	Arabidopsis thaliana	240	+	TATA	core promoter element around -30 of transcription start
224	G21621	TATA-box	Arabidopsis thaliana	281	+	TATA	core promoter element around -30 of transcription start
224	G21621	TGACG-motif	Hordeum vulgare	258	-	TGACG	cis-acting regulatory element involved in the MeJA-responsiveness
224	G21621	Unnamed__1	Glycine max	890	+	GAATTTAATTAA	60K protein binding site
224	G21621	Unnamed__1	Zea mays	255	-	CGTGG
224	G21621	Unnamed__1	Zea mays	58	-	CGTGG
224	G21621	Unnamed__1	Zea mays	14	+	CGTGG
224	G21621	W box	Arabidopsis thaliana	180	+	TTGACC
224	G21621	as-1	Arabidopsis thaliana	258	-	TGACG
224	G21621	circadian	Lycopersicon esculentum	112	+	CAAAGATATC	cis-acting regulatory element involved in circadian control
224	G3425	3-AF1 binding site	Solanum tuberosum	480	+	TAAGAGAGGAA	light responsive element
224	G3425	AAGAA-motif	Avena sativa	48	+	GAAAGAA
224	G3425	AAGAA-motif	Avena sativa	980	+	gGTAAAGAAA
224	G3425	AAGAA-motif	Avena sativa	943	+	GAAAGAA
224	G3425	AT1-motif	Solanum tuberosum	22	+	AATTATTTTTTATT	part of a light responsive module
224	G3425	AT~TATA-box	Arabidopsis thaliana	543	-	TATATA
224	G3425	AT~TATA-box	Arabidopsis thaliana	85	+	TATATA
224	G3425	AT~TATA-box	Arabidopsis thaliana	193	+	TATATA
224	G3425	AT~TATA-box	Arabidopsis thaliana	318	+	TATATA
224	G3425	AT~TATA-box	Arabidopsis thaliana	541	-	TATATAAA
224	G3425	Box 4	Petroselinum crispum	381	+	ATTAAT	part of a conserved DNA module involved in light responsiveness
224	G3425	Box 4	Petroselinum crispum	763	-	ATTAAT	part of a conserved DNA module involved in light responsiveness
224	G3425	CAAT-box	Nicotiana glutinosa	307	+	CAAT
224	G3425	CAAT-box	Pisum sativum	291	-	CAAAT	common cis-acting element in promoter and enhancer regions
224	G3425	CAAT-box	Nicotiana glutinosa	81	+	CAAT
224	G3425	CAAT-box	Pisum sativum	885	+	CAAAT	common cis-acting element in promoter and enhancer regions
224	G3425	CAAT-box	Nicotiana glutinosa	314	-	CAAT
224	G3425	CAAT-box	Nicotiana glutinosa	303	-	CAAT
224	G3425	CAAT-box	Pisum sativum	38	+	CAAAT	common cis-acting element in promoter and enhancer regions
224	G3425	CAAT-box	Nicotiana glutinosa	717	+	CAAT
224	G3425	CAAT-box	Nicotiana glutinosa	365	+	CAAT
224	G3425	CAAT-box	Pisum sativum	508	+	CAAAT	common cis-acting element in promoter and enhancer regions
224	G3425	CAAT-box	Nicotiana glutinosa	103	-	CAAT
224	G3425	CCAAT-box	Arabidopsis thaliana	672	-	CCAAT	common cis-acting element in promoter and enhancer regions
224	G3425	ERE	Nicotiana glutinos	862	+	ATTTTAAA
224	G3425	ERE	Nicotiana glutinos	842	+	ATTTTAAA
224	G3425	ERE	Nicotiana glutinos	791	-	ATTTTAAA
224	G3425	ERE	Nicotiana glutinos	527	+	ATTTTAAA
224	G3425	ERE	Nicotiana glutinos	371	+	ATTTTAAA
224	G3425	ERE	Nicotiana glutinos	66	+	ATTTTAAA
224	G3425	ERE	Nicotiana glutinos	93	+	ATTTTAAA
224	G3425	MYB	Arabidopsis thaliana	294	-	TAACCA
224	G3425	MYB	Arabidopsis thaliana	875	+	TAACCA
224	G3425	MYB-like sequence	Arabidopsis thaliana	875	+	TAACCA
224	G3425	MYB-like sequence	Arabidopsis thaliana	294	-	TAACCA
224	G3425	MYC	Arabidopsis thaliana	290	+	CATTTG
224	G3425	O2-site	Zea mays	12	+	GATGA(C/T)(A/G)TG(A/G)	cis-acting regulatory element involved in zein metabolism regulation
224	G3425	TATA-box	Brassica napus	657	-	ATATAT	core promoter element around -30 of transcription start
224	G3425	TATA-box	Brassica oleracea	888	+	ATATAA	core promoter element around -30 of transcription start
224	G3425	TATA-box	Brassica oleracea	564	+	ATATAA	core promoter element around -30 of transcription start
224	G3425	TATA-box	Arabidopsis thaliana	542	-	TATATAA	core promoter element around -30 of transcription start
224	G3425	TATA-box	Arabidopsis thaliana	322	+	TATTTAAA	core promoter element around -30 of transcription start
224	G3425	TATA-box	Arabidopsis thaliana	234	-	TATAA	core promoter element around -30 of transcription start
224	G3425	TATA-box	Arabidopsis thaliana	658	-	TATA	core promoter element around -30 of transcription start
224	G3425	TATA-box	Arabidopsis thaliana	638	-	TATA	core promoter element around -30 of transcription start
224	G3425	TATA-box	Arabidopsis thaliana	599	-	TATA	core promoter element around -30 of transcription start
224	G3425	TATA-box	Arabidopsis thaliana	889	-	TATA	core promoter element around -30 of transcription start
224	G3425	TATA-box	Arabidopsis thaliana	565	-	TATA	core promoter element around -30 of transcription start
224	G3425	TATA-box	Arabidopsis thaliana	545	-	TATA	core promoter element around -30 of transcription start
224	G3425	TATA-box	Helianthus annuus	541	-	TATAAA	core promoter element around -30 of transcription start
224	G3425	TATA-box	Arabidopsis thaliana	524	-	TATA	core promoter element around -30 of transcription start
224	G3425	TATA-box	Brassica oleracea	544	+	ATATAA	core promoter element around -30 of transcription start
224	G3425	TATA-box	Arabidopsis thaliana	43	+	TATA	core promoter element around -30 of transcription start
224	G3425	TATA-box	Arabidopsis thaliana	647	-	TAAAGATT	core promoter element around -30 of transcription start
224	G3425	TATA-box	Brassica napus	41	+	ATTATA	core promoter element around -30 of transcription start
224	G3425	TATA-box	Brassica oleracea	637	+	ATATAA	core promoter element around -30 of transcription start
224	G3425	TATA-box	Arabidopsis thaliana	132	+	TATA	core promoter element around -30 of transcription start
224	G3425	TATA-box	Arabidopsis thaliana	195	+	TATA	core promoter element around -30 of transcription start
224	G3425	TATA-box	Arabidopsis thaliana	529	-	TATTTAAA	core promoter element around -30 of transcription start
224	G3425	TATA-box	Arabidopsis thaliana	543	-	TATATA	core promoter element around -30 of transcription start
224	G3425	TATA-box	Arabidopsis thaliana	318	+	TATATA	core promoter element around -30 of transcription start
224	G3425	TATA-box	Brassica napus	86	+	ATATAT	core promoter element around -30 of transcription start
224	G3425	TATA-box	Arabidopsis thaliana	386	+	TATTTAAA	core promoter element around -30 of transcription start
224	G3425	TATA-box	Arabidopsis thaliana	42	-	TATAA	core promoter element around -30 of transcription start
224	G3425	TATA-box	Brassica oleracea	797	+	ATATAA	core promoter element around -30 of transcription start
224	G3425	TATA-box	Arabidopsis thaliana	798	-	TATA	core promoter element around -30 of transcription start
224	G3425	TATA-box	Helianthus annuus	233	-	TATAAA	core promoter element around -30 of transcription start
224	G3425	TATA-box	Arabidopsis thaliana	8	+	TATA	core promoter element around -30 of transcription start
224	G3425	TATA-box	Arabidopsis thaliana	555	-	TATTTAAA	core promoter element around -30 of transcription start
224	G3425	TATA-box	Arabidopsis thaliana	235	+	TATA	core promoter element around -30 of transcription start
224	G3425	TATA-box	Pisum sativum	540	-	TATAAAA	core promoter element around -30 of transcription start
224	G3425	TATA-box	Arabidopsis thaliana	87	+	TATA	core promoter element around -30 of transcription start
224	G3425	TATA-box	Arabidopsis thaliana	827	-	TATA	core promoter element around -30 of transcription start
224	G3425	TATA-box	Arabidopsis thaliana	193	+	TATATA	core promoter element around -30 of transcription start
224	G3425	TATA-box	Brassica oleracea	826	+	ATATAA	core promoter element around -30 of transcription start
224	G3425	TATA-box	Brassica napus	83	+	ATTATA	core promoter element around -30 of transcription start
224	G3425	TATA-box	Arabidopsis thaliana	111	+	TATA	core promoter element around -30 of transcription start
224	G3425	TATA-box	Arabidopsis thaliana	320	+	TATA	core promoter element around -30 of transcription start
224	G3425	TATA-box	Arabidopsis thaliana	84	-	TATATAA	core promoter element around -30 of transcription start
224	G3425	TATA-box	Pisum sativum	232	-	TATAAAA	core promoter element around -30 of transcription start
224	G3425	TATA-box	Helianthus annuus	6	-	TATACA	core promoter element around -30 of transcription start
224	G3425	TATA-box	Helianthus annuus	316	-	TATACA	core promoter element around -30 of transcription start
224	G3425	TATA-box	Arabidopsis thaliana	85	+	TATATA	core promoter element around -30 of transcription start
224	G3425	TATA-box	Brassica napus	319	+	ATATAT	core promoter element around -30 of transcription start
224	G3425	TATA-box	Brassica napus	131	+	ATATAT	core promoter element around -30 of transcription start
224	G3425	Unnamed__4	Petroselinum hortense	250	+	CTCC
224	G3425	Unnamed__4	Petroselinum hortense	258	+	CTCC
224	G3425	W box	Arabidopsis thaliana	495	+	TTGACC
224	G3896	ABRE	Arabidopsis thaliana	762	-	ACGTG	cis-acting element involved in the abscisic acid responsiveness
224	G3896	AE-box	Arabidopsis thaliana	229	+	AGAAACAA	part of a module for light response
224	G3896	AE-box	Arabidopsis thaliana	522	+	AGAAACAA	part of a module for light response
224	G3896	ARE	Zea mays	635	+	AAACCA	cis-acting regulatory element essential for the anaerobic induction
224	G3896	ATCT-motif	Pisum sativum	630	+	AATCTAATCC	part of a conserved DNA module involved in light responsiveness
224	G3896	ATCT-motif	Pisum sativum	443	+	AATCTAATCC	part of a conserved DNA module involved in light responsiveness
224	G3896	ATCT-motif	Pisum sativum	381	+	AATCTAATCC	part of a conserved DNA module involved in light responsiveness
224	G3896	Box 4	Petroselinum crispum	894	-	ATTAAT	part of a conserved DNA module involved in light responsiveness
224	G3896	Box 4	Petroselinum crispum	783	-	ATTAAT	part of a conserved DNA module involved in light responsiveness
224	G3896	Box 4	Petroselinum crispum	607	-	ATTAAT	part of a conserved DNA module involved in light responsiveness
224	G3896	Box 4	Petroselinum crispum	492	+	ATTAAT	part of a conserved DNA module involved in light responsiveness
224	G3896	CAAT-box	Pisum sativum	743	+	CAAAT	common cis-acting element in promoter and enhancer regions
224	G3896	CAAT-box	Pisum sativum	873	+	CAAAT	common cis-acting element in promoter and enhancer regions
224	G3896	CAAT-box	Pisum sativum	527	+	CAAAT	common cis-acting element in promoter and enhancer regions
224	G3896	CAAT-box	Pisum sativum	361	-	CAAAT	common cis-acting element in promoter and enhancer regions
224	G3896	CCAAT-box	Arabidopsis thaliana	943	-	CCAAT	common cis-acting element in promoter and enhancer regions
224	G3896	CAAT-box	Pisum sativum	698	+	CAAAT	common cis-acting element in promoter and enhancer regions
224	G3896	CAAT-box	Nicotiana glutinosa	583	+	CAAT
224	G3896	CAAT-box	Pisum sativum	102	+	CAAAT	common cis-acting element in promoter and enhancer regions
224	G3896	CAAT-box	Pisum sativum	898	-	CAAAT	common cis-acting element in promoter and enhancer regions
224	G3896	CAAT-box	Pisum sativum	677	-	CAAAT	common cis-acting element in promoter and enhancer regions
224	G3896	CAAT-box	Pisum sativum	639	+	CAAAT	common cis-acting element in promoter and enhancer regions
224	G3896	CAAT-box	Pisum sativum	234	+	CAAAT	common cis-acting element in promoter and enhancer regions
224	G3896	CAAT-box	Nicotiana glutinosa	375	-	CAAT
224	G3896	CGTCA-motif	Hordeum vulgare	965	-	CGTCA	cis-acting regulatory element involved in the MeJA-responsiveness
224	G3896	ERE	Nicotiana glutinos	308	-	ATTTCATA
224	G3896	G-Box	Pisum sativum	762	+	CACGTT	cis-acting regulatory element involved in light responsiveness
224	G3896	G-box	Zea mays	268	+	CACGAC	cis-acting regulatory element involved in light responsiveness
224	G3896	GT1-motif	Arabidopsis thaliana	879	-	GGTTAA	light responsive element
224	G3896	GT1-motif	Avena sativa	878	-	GGTTAAT	light responsive element
224	G3896	LAMP-element	Pisum sativum	5	-	CTTTATCA	part of a light responsive element
224	G3896	MBS	Arabidopsis thaliana	905	-	CAACTG	MYB binding site involved in drought-inducibility
224	G3896	MYB	Arabidopsis thaliana	880	+	TAACCA
224	G3896	MYB-like sequence	Arabidopsis thaliana	880	+	TAACCA
224	G3896	Myb	Arabidopsis thaliana	905	-	CAACTG
224	G3896	P-box	Oryza sativa	754	-	CCTTTTG	gibberellin-responsive element
224	G3896	STRE	Arabidopsis thaliana	801	+	AGGGG
224	G3896	TATA-box	Arabidopsis thaliana	977	-	TATA	core promoter element around -30 of transcription start
224	G3896	TATA-box	Arabidopsis thaliana	976	-	TATAA	core promoter element around -30 of transcription start
224	G3896	TATA-box	Helianthus annuus	328	-	TATAAA	core promoter element around -30 of transcription start
224	G3896	TATA-box	Arabidopsis thaliana	349	+	TATA	core promoter element around -30 of transcription start
224	G3896	TATA-box	Arabidopsis thaliana	287	+	TATA	core promoter element around -30 of transcription start
224	G3896	TATA-box	Arabidopsis thaliana	262	-	TATAA	core promoter element around -30 of transcription start
224	G3896	TATA-box	Helianthus annuus	246	-	TATAAA	core promoter element around -30 of transcription start
224	G3896	TATA-box	Arabidopsis thaliana	286	-	TATAA	core promoter element around -30 of transcription start
224	G3896	TATA-box	Helianthus annuus	261	-	TATAAA	core promoter element around -30 of transcription start
224	G3896	TATA-box	Oryza sativa	625	+	TACAAAA	core promoter element around -30 of transcription start
224	G3896	TATA-box	Arabidopsis thaliana	568	+	TATTTAAA	core promoter element around -30 of transcription start
224	G3896	TATA-box	Arabidopsis thaliana	330	+	TATA	core promoter element around -30 of transcription start
224	G3896	TATA-box	Pisum sativum	260	-	TATAAAA	core promoter element around -30 of transcription start
224	G3896	TATA-box	Arabidopsis thaliana	263	+	TATA	core promoter element around -30 of transcription start
224	G3896	TATA-box	Arabidopsis thaliana	329	-	TATAA	core promoter element around -30 of transcription start
224	G3896	TATA-box	Arabidopsis thaliana	247	-	TATAA	core promoter element around -30 of transcription start
[truncated: 497 more rows]
